# Supplementary material for: Cyanophenylcarbazole isomers exhibiting different UV and visible light excitable room temperature phosphorescence
Source: Royal Society of Chemistry journal article supplement (doi:10.1039/c9tc03444g), 2019-01-01
Supplement: c9tc03444g1.pdf [file c9tc03444g1.pdf]

## Supporting Information

# Cyanophenylcarbazole isomers exhibiting different UV and visible light excitable room temperature phosphorescence

Yanhui Wang,[†] Zhenzhen Zhang,[†] Linxi Liu, Shou Yuan, Jie Ma, Danfeng Liu,  
Shanfeng Xue, Qikun Sun,\* Wenjun Yang\*

Key Laboratory of Rubber-plastics of Ministry of Education/Shandong Province  
(QUST), School of Polymer Science & Engineering, Qingdao University of Science &  
Technology, 53-Zhengzhou Road, Qingdao, 266042, P. R. China. E-mail:  
ywjph2004@qust.edu.cn, sunqikun303@163.com.

## Contents

### Measurements

### Experimental section

#### 1.Synthesis

**Scheme S1a** The Synthetic route of PCN.

**Scheme S1b** The Synthetic route of MCN.

**Scheme S1c** The Synthetic route of OCN.

**Scheme S1d** The Synthetic route of 2CN.

**Scheme S1e** The Synthetic route of 3CN.

#### 2. Figures

**Figure S1a** <sup>1</sup>H and <sup>13</sup>C NMR spectra of PCN in CDCl<sub>3</sub>.

**Figure S1b** <sup>1</sup>H and <sup>13</sup>C NMR spectra of MCN in CDCl<sub>3</sub>.

**Figure S1c** <sup>1</sup>H and <sup>13</sup>C NMR spectra of OCN in CDCl<sub>3</sub>.

**Figure S1d** <sup>1</sup>H and <sup>13</sup>C NMR spectra of 2CN in CDCl<sub>3</sub>.

**Figure S1e** <sup>1</sup>H and <sup>13</sup>C NMR spectra of 3CN in CDCl<sub>3</sub>.

**Figure S2** The gas chromatograms of XCN and CZ.

**Figure S3a** The mass spectrum of PCN.

**Figure S3b** The mass spectrum of MCN.

**Figure S3c** The mass spectrum of OCN.

**Figure S3d** The mass spectrum of 2CN.

**Figure S3e** The mass spectrum of 3CN.

**Figure S4** Differential scanning calorimetric (DSC) curves of XCN.

**Figure S5** Thermogravimetric analysis (TGA) curves of XCN.

**Figure S6** Energy level diagrams and possible ISC channels for XCN crystals based on the bottom interacted pair in Figure 5.

**Figure S7** Normalized UV absorption and PL spectra of NPC-XCN in THF ( $1.0 \times 10^{-5}$  M) under ambient conditions.

**Figure S8** Time-resolved emission decay curves of XCN solution fluorescence in THF at 298 K.  $\tau$  is the fluorescence lifetime;  $\Phi$  represents the fluorescence efficiency.

**Figure S9** Time-resolved emission decay curves of XCN crystal powder fluorescence at 298 K.  $\tau$  is the fluorescence lifetime;  $\Phi$  represents the fluorescence efficiency.

**Figure S10** Photoluminescence photos of XCN crystals before and after UV off (365 nm) at room temperature in air, and the corresponding RTP lifetimes ( $\tau$ ) are labeled in the end photos.

**Figure S11** Time-resolved emission decay curves of XCN crystal powder phosphorescence at 78 K.

**Figure S12a** The unit cell of PCN single crystal.

**Figure S12b** The unit cell of MCN single crystal.

**Figure S12c** The unit cell of OCN single crystal.

**Figure S12d** The unit cell of 2CN single crystal.

**Figure S12e** The unit cell of 3CN single crystal.

**Figure S13** The spectra of 400, 420, 440, and 460 nm visible-light detected by CCD spectrometer.

**Figure S14a** RTP spectra of PCN crystalline powder under the excitation of 365-460 nm. (The right side focuses on the curves of 400-460nm excitation.)

**Figure S14b** RTP spectra of MCN crystalline powder under the excitation of 365-460 nm. (The right side focuses on the curves of 400-460nm excitation.)

**Figure S14c** RTP spectra of OCN crystalline powder under the excitation of 365-460 nm. (The right side focuses on the curves of 400-460nm excitation.)

**Figure S14d** RTP spectra of 2CN crystalline powder under the excitation of 365-460 nm. (The right side focuses on the curves of 400-460nm excitation.)

**Figure S14e** RTP spectra of 3CN crystalline powder under the excitation of 365-460 nm. (The right side focuses on the curves of 400-460nm excitation.)

**Figure S15** Photoluminescence photos of XCN crystalline powders upon exciting with

365 nm UV light and removing UV and visible excitation light. The labeled number is the RTP lifetimes ( $\tau$  in ms) under the excitation of different UV and visible light.

### 3. Tables

**Table S1a** Single crystal structural parameters of PCN.

**Table S1b** Single crystal structural parameters of MCN.

**Table S1c** Single crystal structural parameters of OCN.

**Table S1d** Single crystal structural parameters of 2CN.

**Table S1e** Single crystal structural parameters of 3CN.

**Table S2** The NTOs of XCN.

**Table S3a** The singlet and triplet excited state transition configurations of the PCN from single crystal revealed by TD-DFT calculations. The matched excited states that contain the same orbital transition components of  $S_1$  and  $|S_1-T_n| < 0.3$  eV were highlighted in red. (for the upper interacted pair in Figure 5)

**Table S3b** The singlet and triplet excited state transition configurations of the MCN from single crystal revealed by TD-DFT calculations. The matched excited states that contain the same orbital transition components of  $S_1$  and  $|S_1-T_n| < 0.3$  eV were highlighted in red. (for the upper interacted pair in Figure 5)

**Table S3c** The singlet and triplet excited state transition configurations of the OCN from single crystal revealed by TD-DFT calculations. The matched excited states that contain the same orbital transition components of  $S_1$  and  $|S_1-T_n| < 0.3$  eV were highlighted in red. (for the upper interacted pair in Figure 5)

**Table S3d** The singlet and triplet excited state transition configurations of the 2CN from single crystal revealed by TD-DFT calculations. The matched excited states that contain the same orbital transition components of  $S_1$  and  $|S_1-T_n| < 0.3$  eV were highlighted in red. (for the upper interacted pair in Figure 5)

**Table S3e** The singlet and triplet excited state transition configurations of the 3CN from single crystal revealed by TD-DFT calculations. The matched excited states that contain the same orbital transition components of  $S_1$  and  $|S_1-T_n| < 0.3$  eV were highlighted in red. (for the upper interacted pair in Figure 5)

**Table S4a** The singlet and triplet excited state transition configurations of the PCN from single crystal revealed by TD-DFT calculations. The matched excited states that contain the same orbital transition components of  $S_1$  and  $|S_1-T_n| < 0.3$  eV were highlighted in red. (for the bottom interacted pair in Figure 5)

**Table S4b** The singlet and triplet excited state transition configurations of the MCN from single crystal revealed by TD-DFT calculations. The matched excited states that

contain the same orbital transition components of  $S_1$  and  $|S_1-T_n| < 0.3$  eV were highlighted in red. (for the bottom interacted pair in Figure 5)

**Table S4c** The singlet and triplet excited state transition configurations of the OCN from single crystal revealed by TD-DFT calculations. The matched excited states that contain the same orbital transition components of  $S_1$  and  $|S_1-T_n| < 0.3$  eV were highlighted in red. (for the bottom interacted pair in Figure 5)

**Table S4d** The singlet and triplet excited state transition configurations of the 2CN from single crystal revealed by TD-DFT calculations. The matched excited states that contain the same orbital transition components of  $S_1$  and  $|S_1-T_n| < 0.3$  eV were highlighted in red. (for the bottom interacted pair in Figure 5)

**Table S4e** The singlet and triplet excited state transition configurations of the 3CN from single crystal revealed by TD-DFT calculations. The matched excited states that contain the same orbital transition components of  $S_1$  and  $|S_1-T_n| < 0.3$  eV were highlighted in red. (for the bottom interacted pair in Figure 5)

**Table S5** The ellipsoid plot of XCN crystal.

**Table S6a** The bond lengths of PCN in X-ray crystal structure.

**Table S6b** The bond lengths of MCN in X-ray crystal structure.

**Table S6c** The bond lengths of OCN in X-ray crystal structure.

**Table S6d** The bond lengths of 2CN in X-ray crystal structure.

**Table S6e** The bond lengths of 3CN in X-ray crystal structure.

**Table S7a** The bond angles of PCN in X-ray crystal structure.

**Table S7b** The bond angles of MCN in X-ray crystal structure.

**Table S7c** The bond angles of OCN in X-ray crystal structure.

**Table S7d** The bond angles of 2CN in X-ray crystal structure.

**Table S7e** The bond angles of 3CN in X-ray crystal structure.

## Measurements

$^1\text{H}$  and  $^{13}\text{C}$  NMR spectra were recorded on a Bruker AC500 spectrometer at 500 MHz and 125 MHz, respectively, using deuterated chloroform ( $\text{CDCl}_3$ ) as the solvent and tetramethylsilane (TMS) as the internal standard. UV-visible absorption and photofluorescence and phosphorescence emission spectra were recorded on Hitachi U-4100 and Hitachi F-4600 spectrophotometers, respectively. Differential scanning calorimetry (DSC) curves were determined on a Netzsch DSC (204F1) instrument at a heating rate of  $10\text{ }^\circ\text{C min}^{-1}$ . Thermogravimetric analysis (TGA) was performed on a Netzsch (209F1) thermogravimetric analyzer in a nitrogen atmosphere ( $50\text{ mL min}^{-1}$ ) at a heating rate of  $10\text{ }^\circ\text{C min}^{-1}$ . Time-resolved spectra were recorded by a Hamamatsu compact fluorescence lifetime spectrometer (FLS-1000). The gas chromatography and mass spectroscopy were recorded by Agilent Technologic 7890A.

The Gaussian 09 program was utilized to perform the TD-DFT calculations. The ground state ( $S_0$ ) geometry was obtained from the single crystal structure and no further geometry optimization was conducted in order to maintain the specific molecular configuration and corresponding intermolecular locations. The exciton energies of the  $n$ -th singlet ( $S_n$ ) and  $n$ -th triplet states ( $T_n$ ) were obtained on the corresponding ground state structure using TD-B3LYP/6-31G\*. The Kohn–Sham frontier orbital analysis and spin density distributions were obtained in order to elucidate the mechanisms of possible singlet–triplet intersystem crossings (ISC). The possible  $S_1$  to  $T_n$  ISC channels are believed to share part of the same transition orbital compositions, and the energy levels of possible  $T_n$  are considered to lie within the range of  $E_{S_1} \pm 0.3\text{ eV}$ . Especially, the major ISC channels are mainly determined based on two elements. First, the ratio of the same transition configuration in  $S_1$  and  $T_n$  should be large in all the transition orbital compositions. Secondly, the energy gap between  $S_1$  and the specific  $T_n$  state should be small.

## Experimental section

### 1.Synthesis

#### 4-(9H-carbazol-9-yl)benzonitrile (PCN)

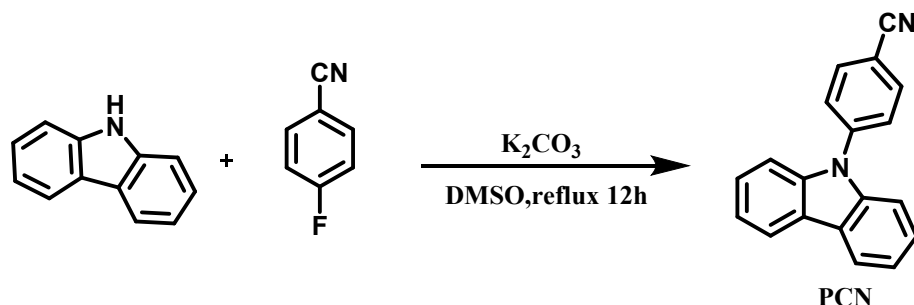

**Scheme S1a** The Synthetic route of PCN.

In a 100 mL bottom, 9H-carbazole (3 g, 17.94 mmol) and  $K_2CO_3$  (8.22 g, 26.91 mmol) in DMSO (30 ml) was stirred at room temperature for 1 h. 4-Fluorobenzonitrile (2.61 g, 21.5 mmol) was added in the mixture and stirred at 150 °C for 12 h. The reaction mixture was poured into a large amount of ice water and stirred for additional 1 h. After the reaction mixture was extracted with ethyl acetate, the combined organic layer dried with anhydrous  $MgSO_4$ , filtered and concentrated in vacuo. The crude product was purified by silica-gel column chromatography using petroleum ether/ethyl acetate (10:1 v/v) as the eluent to give the compound as a white solid (4.09 g, Yield 85 %).

$^1H$  NMR (500 MHz, Chloroform-*d*):  $\delta$  8.14 (d,  $J = 7.7$  Hz, 2H), 7.92–7.86 (m, 2H), 7.75–7.70 (m, 2H), 7.49–7.38 (m, 4H), 7.33 (ddd,  $J = 8.0, 6.2, 1.9$  Hz, 2H).  $^{13}C$  NMR (125MHz, Chloroform-*d*):  $\delta$  142.05, 139.87, 133.89, 127.08, 126.35, 123.98, 120.97, 120.55, 118.33, 110.45, 109.49.

#### 3-(9H-carbazol-9-yl)benzonitrile (MCN)

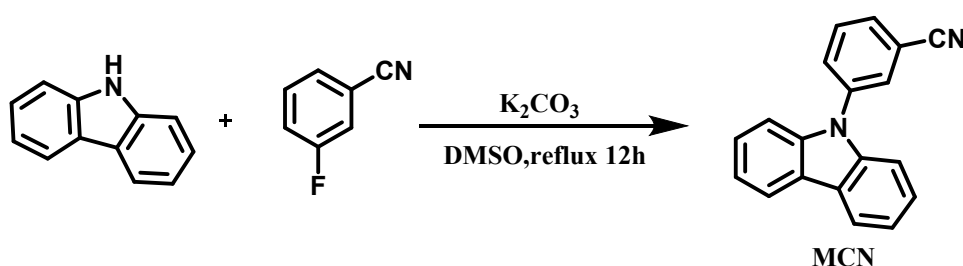

**Scheme S1b** The Synthetic route of MCN.

NPC-mCN was prepared following the same procedure of NPC-pCN by using 3-fluorobenzonitrile. The eluent is petroleum ether/ethyl acetate (20:1 v/v), yielding a white solid (3.66 g, Yield 76 %).

$^1H$  NMR (500 MHz, Chloroform-*d*):  $\delta$  8.16 (ddd,  $J = 7.7, 1.2, 0.7$  Hz, 2H), 7.91 (d,  $J = 3.6$  Hz, 1H), 7.88–7.84 (m, 1H), 7.78–7.72 (m, 2H), 7.45 (ddd,  $J = 8.2, 7.0, 1.2$  Hz, 2H), 7.39 (dt,  $J = 8.3, 0.9$  Hz, 2H), 7.34 (ddd,  $J = 7.9, 7.0, 1.1$  Hz, 2H).  $^{13}C$  NMR (126 MHz, Chloroform-*d*):  $\delta$  140.21, 138.89, 131.47, 130.93, 130.70, 130.30, 126.29, 123.72,

120.74, 120.52, 117.87, 114.20, 109.23.

### 2-(9H-carbazol-9-yl)benzonitrile (OCN)

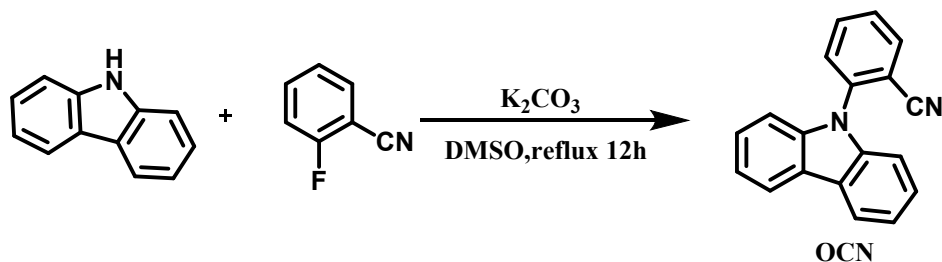

#### Scheme S1c The Synthetic route of OCN.

NPC-oCN was prepared following the same procedure of NPC-pCN by using 2-fluorobenzonitrile. The eluent is petroleum ether/ dichloromethane (5:2 v/v), yielding a white solid (3.85 g, Yield 80%).

$^1H$  NMR (500 MHz, Chloroform-*d*):  $\delta$  8.15 (dt,  $J = 7.7, 1.0$  Hz, 2H), 7.96 (dd,  $J = 8.1, 1.6$  Hz, 1H), 7.84 (td,  $J = 7.8, 1.6$  Hz, 1H), 7.67–7.59 (m, 2H), 7.43 (ddd,  $J = 8.2, 7.1, 1.2$  Hz, 2H), 7.33 (td,  $J = 7.5, 1.0$  Hz, 2H), 7.21 (dd,  $J = 8.1, 0.9$  Hz, 2H).  $^{13}C$  NMR (126 MHz, Chloroform-*d*):  $\delta$  140.70, 140.60, 134.49, 134.26, 129.67, 128.43, 126.17, 123.87, 120.76, 120.52, 115.98, 112.85, 109.65.

### 9-phenyl-9H-carbazole-2-carbonitrile (2CN)

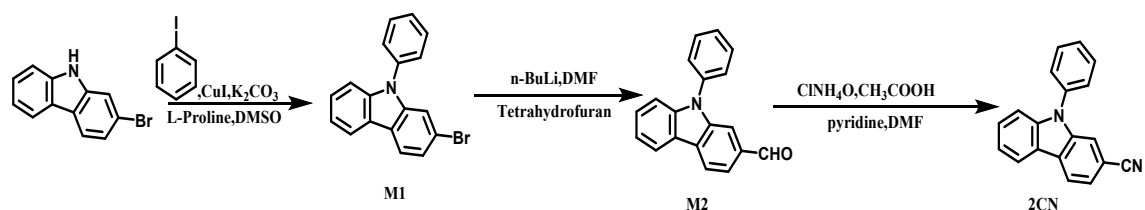

#### Scheme S1d The Synthetic route of 2CN.

A mixture of iodobenzene (3.11 g, 15.25 mmol), 2-bromocarbazole (2.5 g, 10.16 mmol),  $CuI$  (0.94 g, 1.01 mmol), L-proline (0.11 g, 1.01 mmol), and  $K_2CO_3$  (2.20 g, 20.33 mmol) in dimethyl sulfoxide (30 mL) was stirred for 36 hours at 110 °C under nitrogen. After being cooled to room temperature, water was added and extracted with  $CH_2Cl_2$  and dried over anhydrous  $MgSO_4$ . Solvent was removed, and the residue was purified by column chromatography on silica gel using petroleum ether as the eluent. A white solid (1.80 g, Yield 55%) was obtained, which was regarded as 2-bromo-9-phenyl-9H-carbazole (M1).

$n\text{-BuLi}$  (4.52 mL, 11.19 mmol) was added dropwise to a solution of M1 (1.80 g, 5.59 mmol) in anhydrous THF (15 mL) at  $-78$  °C under nitrogen atmosphere. After stirring for 0.5 h, anhydrous DMF (2.61 mL, 33.49 mmol) was added, and the mixture was stirred for an additional 12 h at room temperature. Water and  $CH_2Cl_2$  were added to the mixture, and the organic layer was separated, washed with saturated  $NaHCO_3$ , and dried over  $MgSO_4$ . The solvent was removed, and the residue was purified by silica-gel column chromatography using petroleum ether/ethyl acetate (15:1 v/v) to give 9-phenyl-9H-carbazole-2-carbaldehyde (M2) as a white solid (0.82 g, Yield 54%).

A mixture of M2 (0.82 g, 3.01 mmol), hydroxyamine hydrochloride ( $CINH_4O$ , 0.26

g, 3.68 mmol), acetic acid (CH<sub>3</sub>COOH, 0.62 mL, 10.76 mmol), pyridine (0.41 mL, 5.39 mmol) and DMF (3 mL) was stirred and heated at 140 °C for five hours. The crude product was extracted with dichloromethane and washed with water. The crude product was purified by silica-gel column chromatography using petroleum ether/dichloromethane (3:2 v/v) as the eluent to give the compound as a white solid (0.65 g, Yield 80 %).

<sup>1</sup>H NMR (500 MHz, Chloroform-*d*): δ 8.18 (t, *J* = 8.5 Hz, 2H), 7.65 (dd, *J* = 16.2, 8.4 Hz, 3H), 7.57–7.47 (m, 5H), 7.42 (d, *J* = 8.3 Hz, 1H), 7.35 (t, *J* = 7.4 Hz, 1H). <sup>13</sup>C NMR (126 MHz, Chloroform-*d*): δ 142.07, 139.84, 136.46, 130.20, 128.32, 127.92, 127.01, 126.68, 122.99, 122.10, 121.13, 120.95, 120.84, 120.00, 114.09, 110.28, 108.32.

### 9-phenyl-9H-carbazole-3-carbonitrile (3CN)

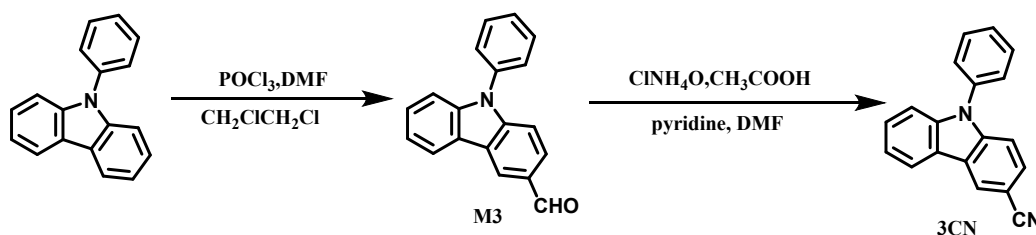

**Scheme S1e** The Synthetic route of 3CN.

A mixture of phosphoryl chloride (0.42 mL, 4.5 mmol) and anhydrous DMF (1.04 mL, 13.50 mmol) was stirred at 0 °C for 1 h, and then 9-phenyl-9H-carbazole (1.00 g, 4.10 mmol, in 20 mL sym-dichloroethane) was added. The reaction temperature was raised to 90 °C and stirred for 8 h. After cooling, the mixture was poured into ice water and extracted with dichloromethane. The solvent was evaporated, and the crude product was purified by a column chromatography on silica gel using petroleum ether/ethyl acetate (1/3) as the eluent to give the compound as a white solid (0.88 g, Yield 79%).

NPC-3CN was prepared following the same procedure of NPC-2CN by using M3. A white solid was obtained (0.71 g, Yield 82%).

<sup>1</sup>H NMR (500 MHz, Chloroform-*d*): δ 8.45 (d, *J* = 1.5 Hz, 1H), 8.16 (d, *J* = 7.8 Hz, 1H), 7.68–7.61 (m, 3H), 7.56–7.46 (m, 4H), 7.43–7.34 (m, 3H). <sup>13</sup>C NMR (125 MHz, Chloroform-*d*): δ 142.54, 141.61, 136.40, 130.14, 129.14, 128.40, 127.35, 127.09, 125.23, 123.44, 122.14, 121.20, 120.61, 120.37, 110.47, 110.34, 102.62.

## 2. Figures

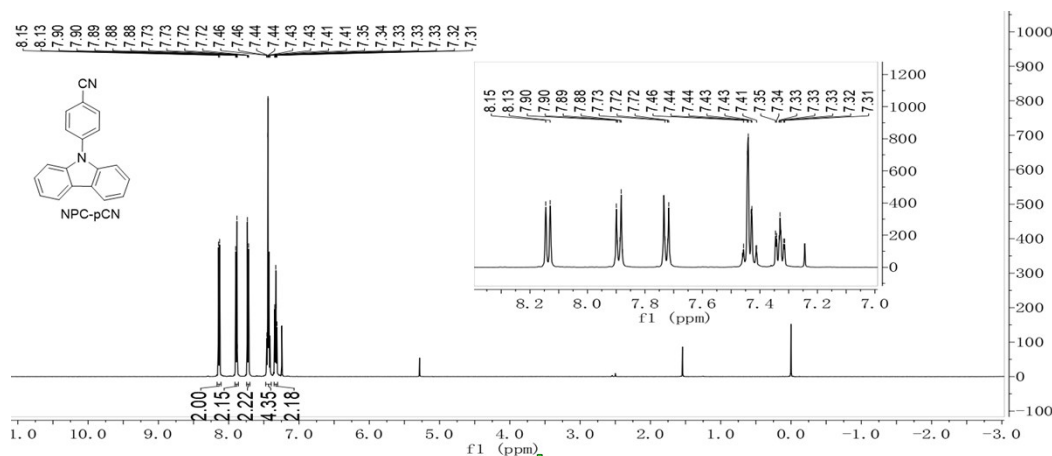



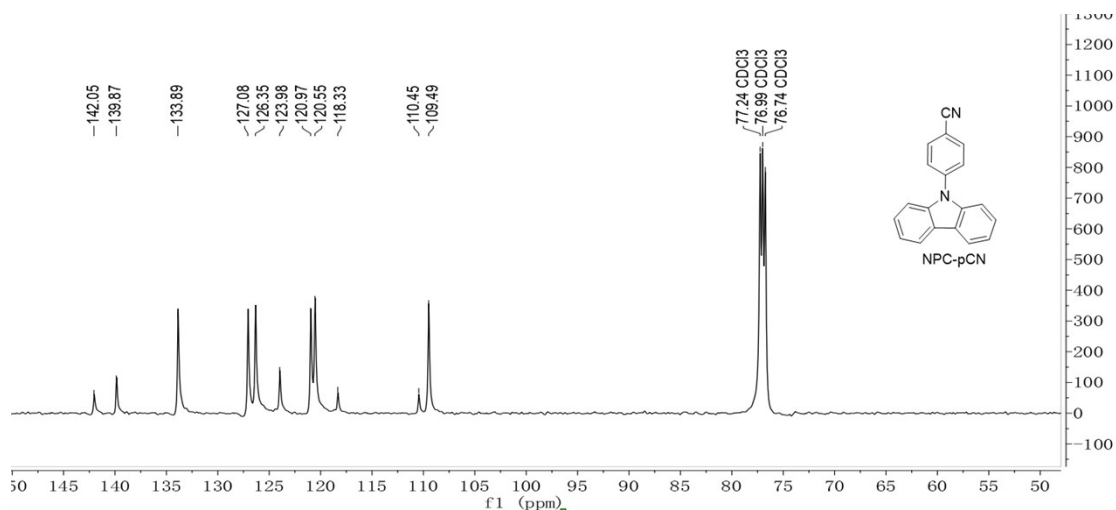

Figure S1a  $^1\text{H}$  and  $^{13}\text{C}$  NMR spectra of PCN in  $\text{CDCl}_3$ .

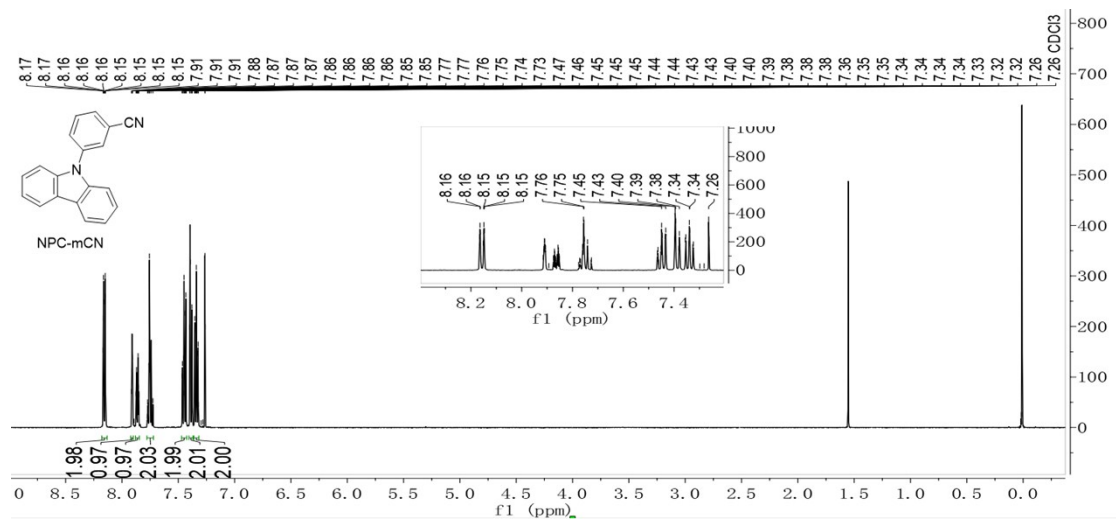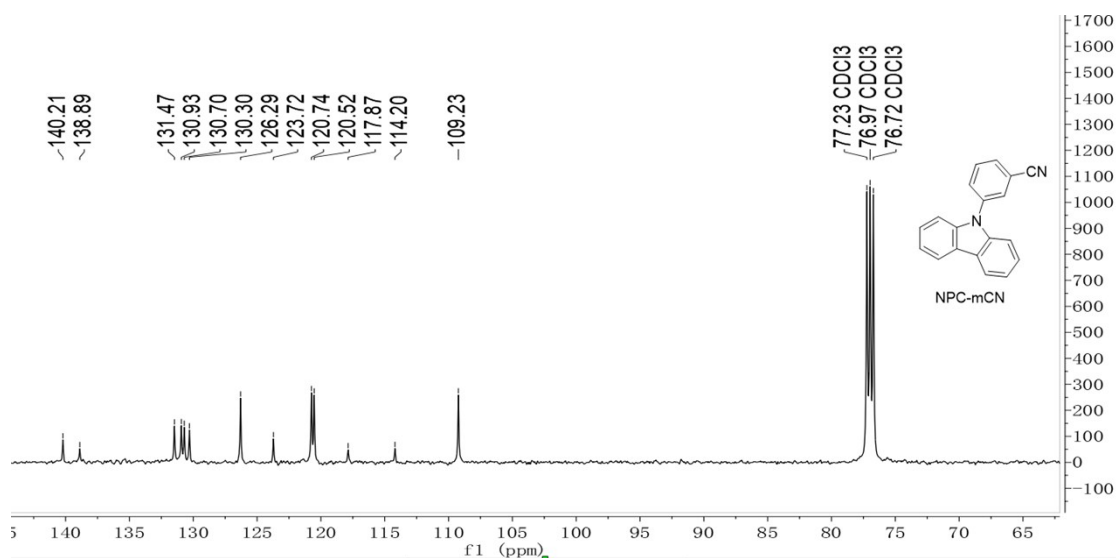

Figure S1b  $^1\text{H}$  and  $^{13}\text{C}$  NMR spectra of MCN in  $\text{CDCl}_3$ .

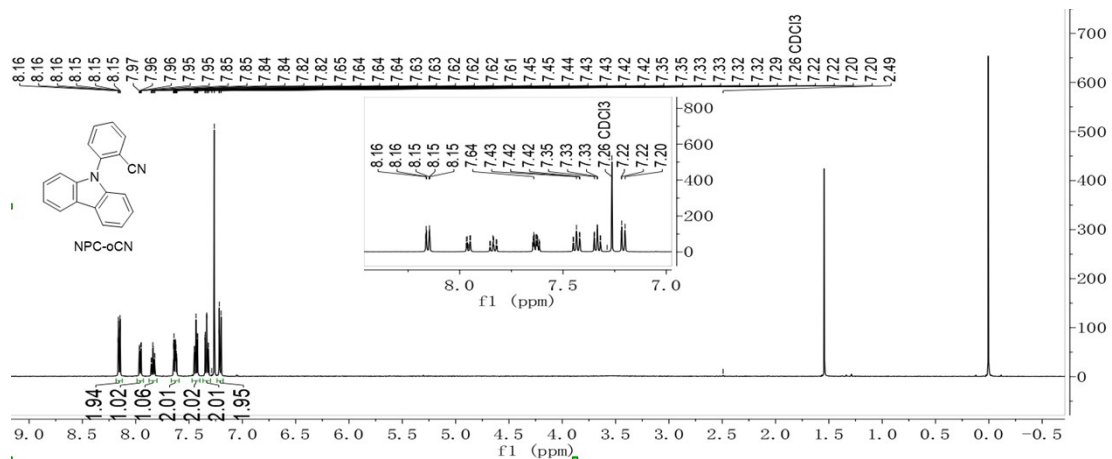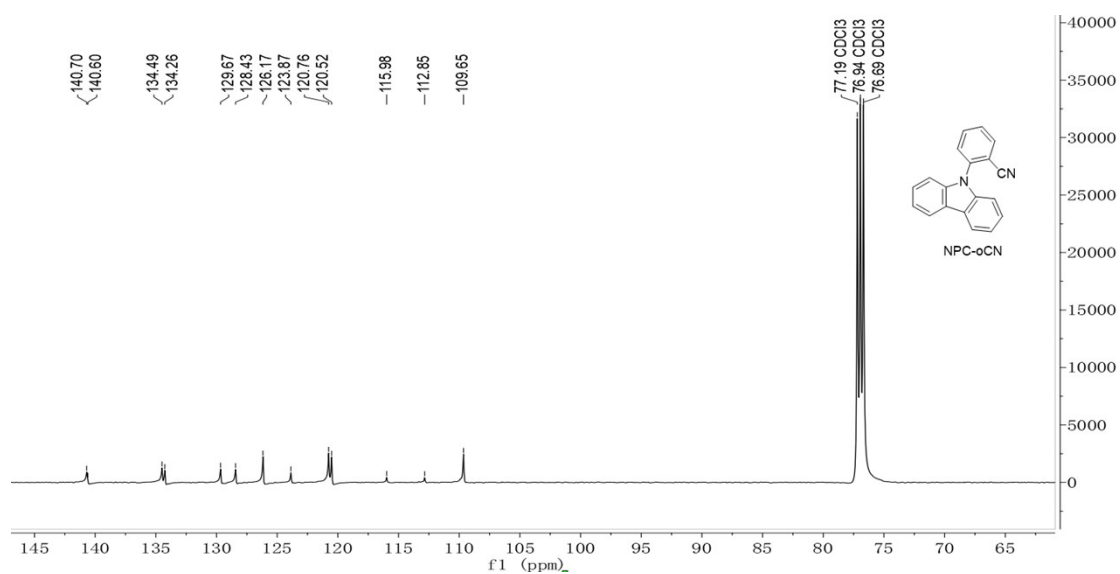

**Figure S1c** <sup>1</sup>H and <sup>13</sup>C NMR spectra of OCN in CDCl<sub>3</sub>.

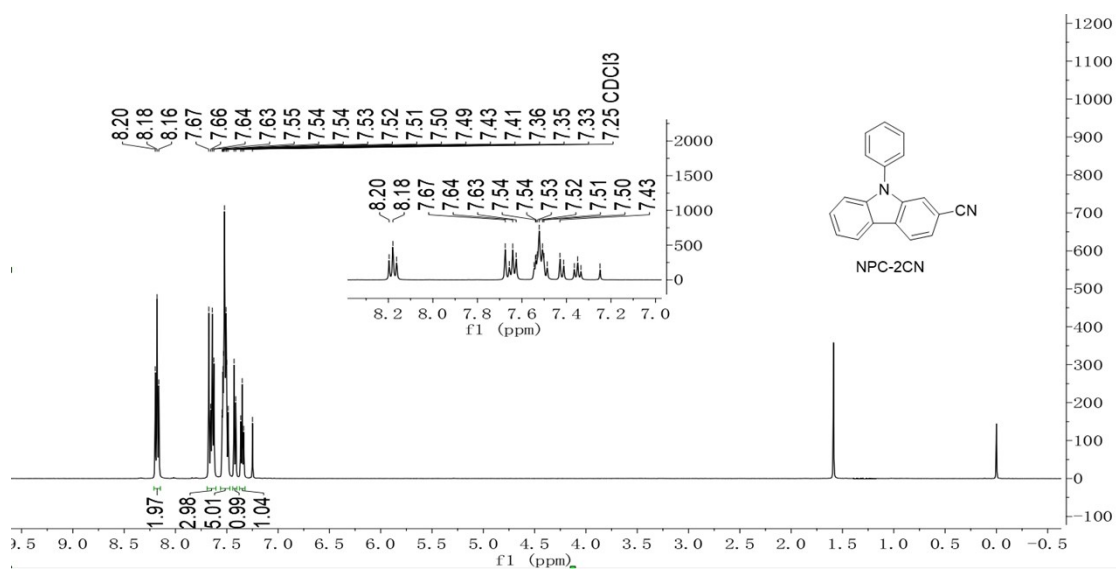

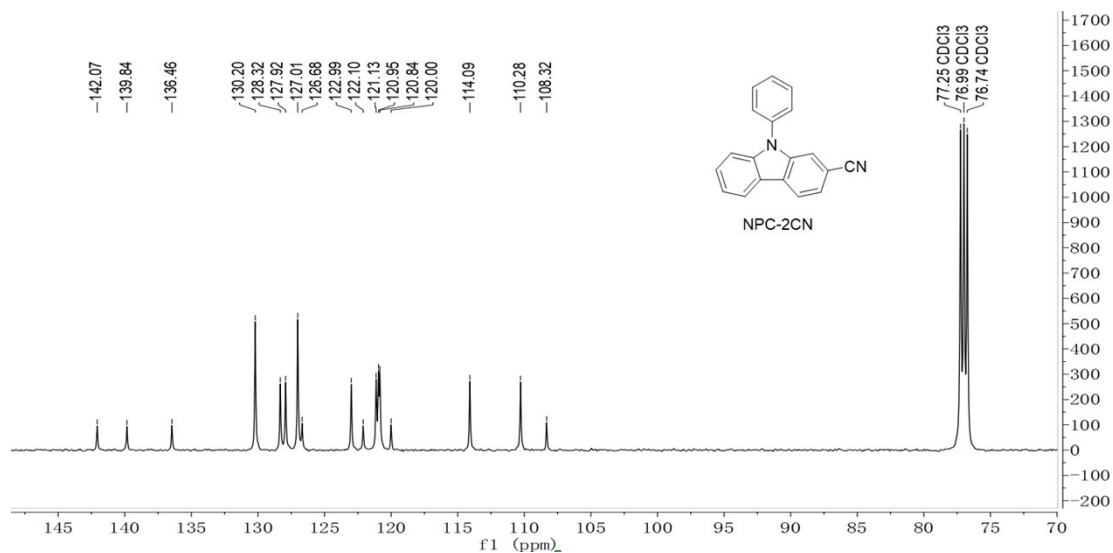

Figure S1d  $^1\text{H}$  and  $^{13}\text{C}$  NMR spectra of 2CN in  $\text{CDCl}_3$ .

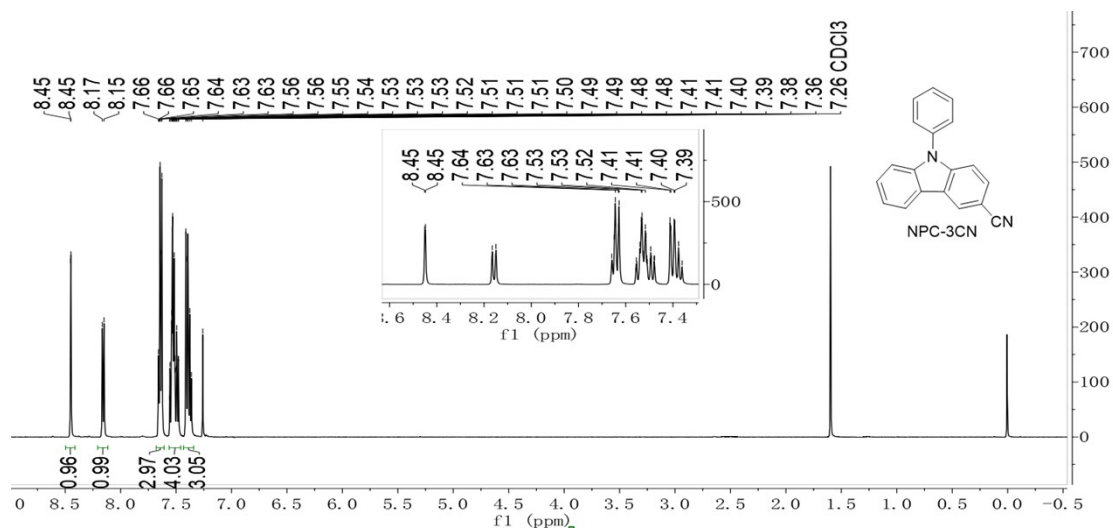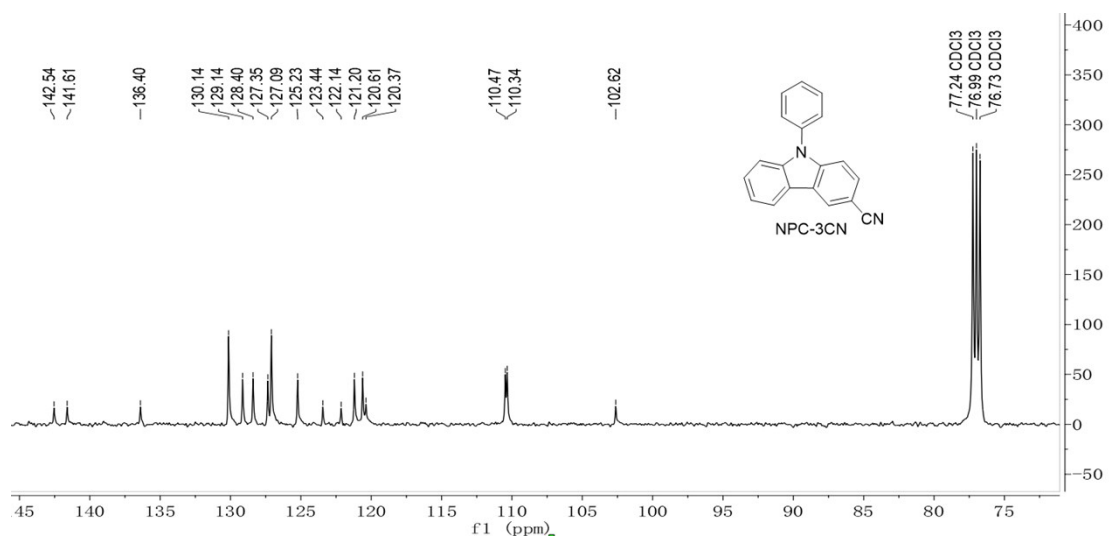

Figure S1e  $^1\text{H}$  and  $^{13}\text{C}$  NMR spectra of 3CN in  $\text{CDCl}_3$ .

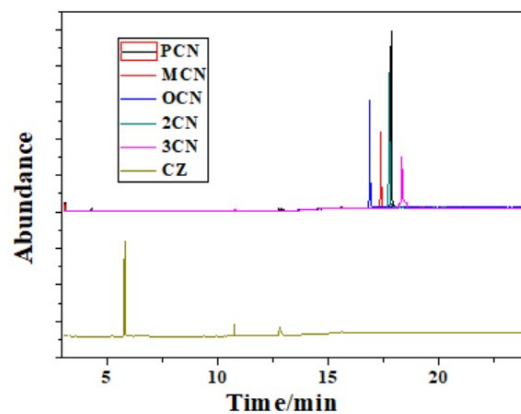

**Figure S2** The gas chromatograms of XCN and CZ.

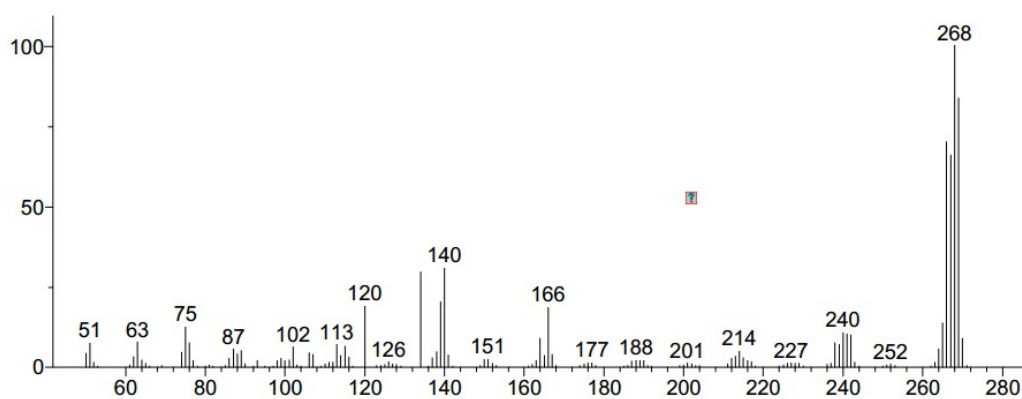

Hit 1 : 7H-Dibenzo(a,g)carbazole, 12,13-dihydro-  
C<sub>20</sub>H<sub>15</sub>N; MF: 759; RMF: 766; Prob 55.6%; CAS: 63077-00-9; Lib: mainlib; ID: 190454.

**Figure S3a** The mass spectrum of PCN.

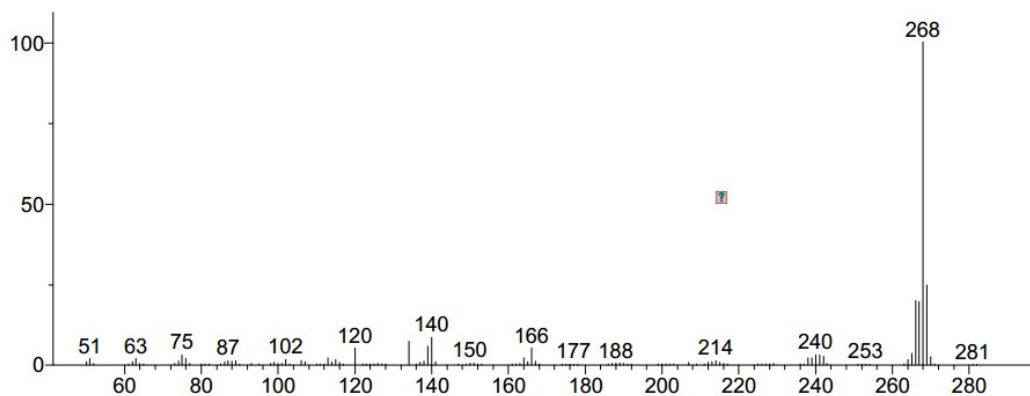

Hit 1 : 7H-Dibenzo(a,g)carbazole, 12,13-dihydro-  
C<sub>20</sub>H<sub>15</sub>N; MF: 766; RMF: 771; Prob 60.9%; CAS: 63077-00-9; Lib: mainlib; ID: 190454.

**Figure S3b** The mass spectrum of MCN.

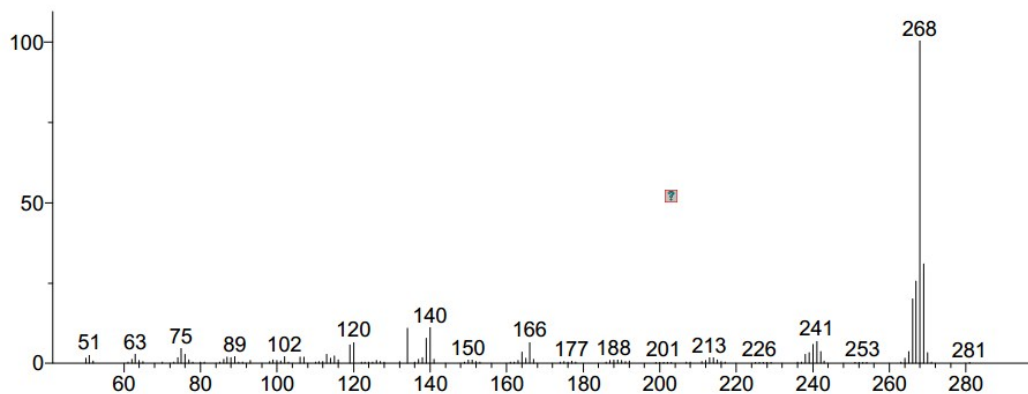

Hit 1 : 7H-Dibenzo(a,g)carbazole, 12,13-dihydro-  
 C<sub>20</sub>H<sub>15</sub>N; MF: 774; RMF: 777; Prob 63.7%; CAS: 63077-00-9; Lib: mainlib; ID: 190454.

**Figure S3c** The mass spectrum of OCN.

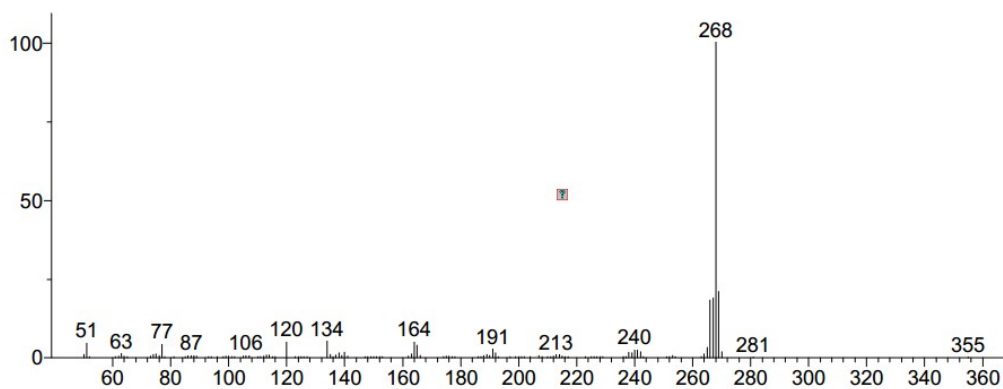

Hit 1 : 7H-Dibenzo(a,g)carbazole, 12,13-dihydro-  
 C<sub>20</sub>H<sub>15</sub>N; MF: 754; RMF: 758; Prob 41.9%; CAS: 63077-00-9; Lib: mainlib; ID: 190454.

**Figure S3d** The mass spectrum of 2CN.

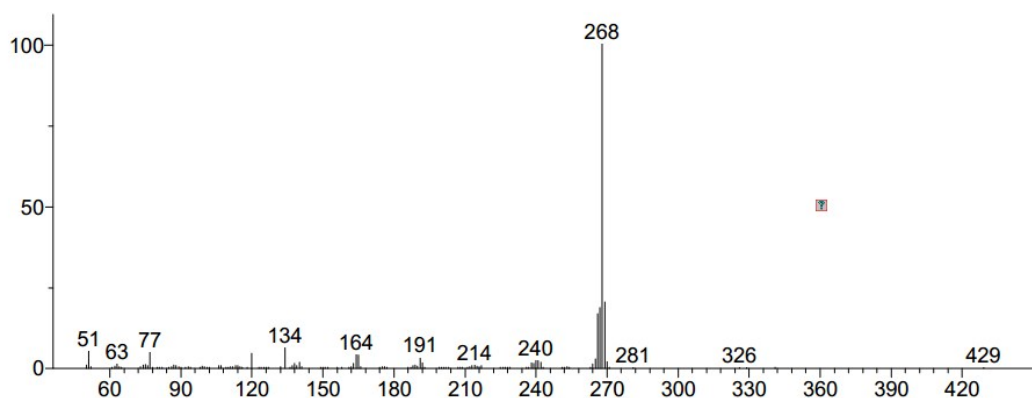

Hit 1 : 7H-Dibenzo(a,g)carbazole, 12,13-dihydro-  
 C<sub>20</sub>H<sub>15</sub>N; MF: 757; RMF: 761; Prob 40.1%; CAS: 63077-00-9; Lib: mainlib; ID: 190454.

**Figure S3e** The mass spectrum of 3CN.

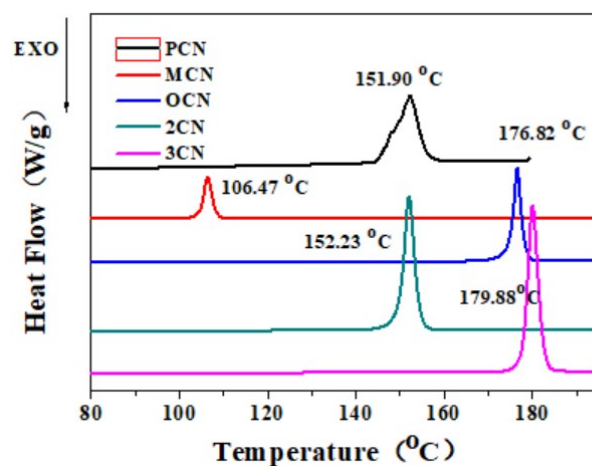

**Figure S4** Differential scanning calorimetric (DSC) curves of XCN.

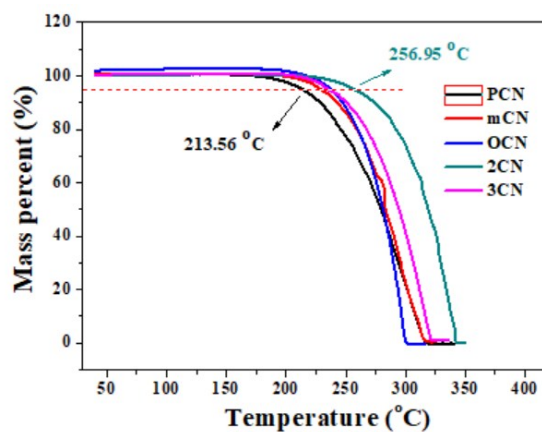

**Figure S5** Thermogravimetric analysis (TGA) curves of XCN.

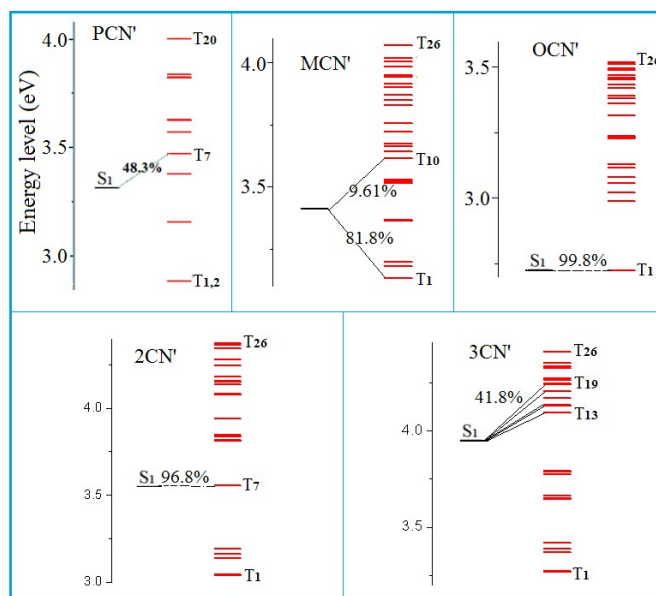

**Figure S6** Energy level diagrams and possible ISC channels for XCN crystals based on the bottom interacted pair in Figure 5.

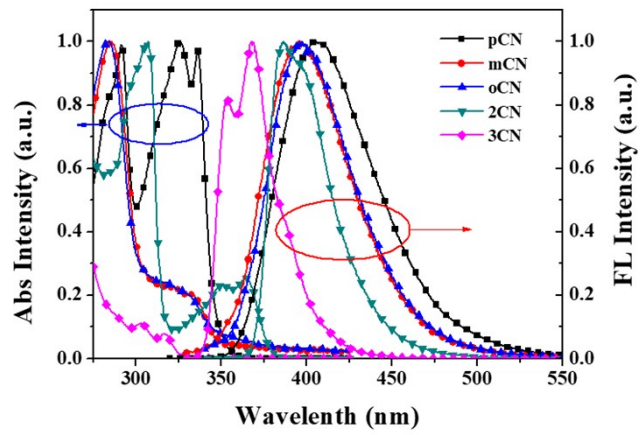

**Figure S7** Normalized UV absorption and PL spectra of NPC-XCN in THF ( $1.0 \times 10^{-5}$  M) under ambient conditions.

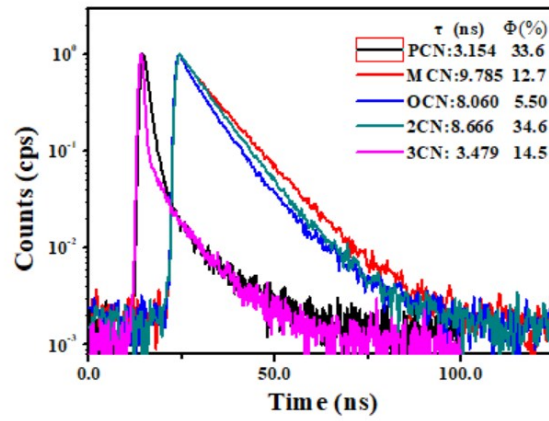

**Figure S8** Time-resolved emission decay curves of XCN solution in THF at 298 K.  $\tau$  is the fluorescence lifetime;  $\Phi$  represents the fluorescence efficiency.

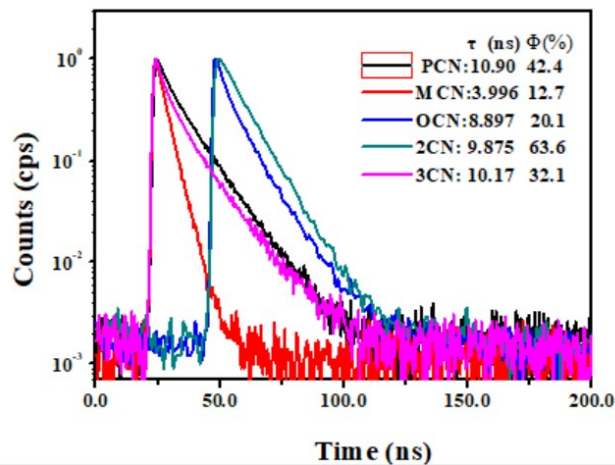

**Figure S9** Time-resolved emission decay curves of XCN crystal powder fluorescence at 298 K.  $\tau$  is the fluorescence lifetime;  $\Phi$  represents the fluorescence efficiency.

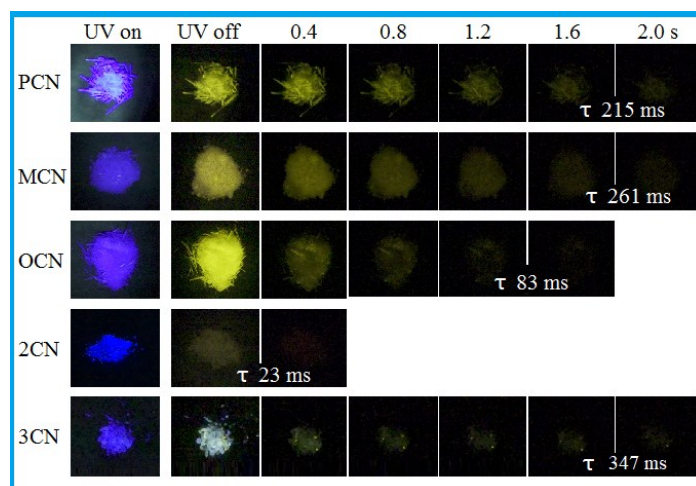

**Figure S10** Photoluminescence photos of XCN crystals before and after UV off (365 nm) at room temperature in air, and the corresponding RTP lifetimes ( $\tau$ ) are labeled in the end photos.

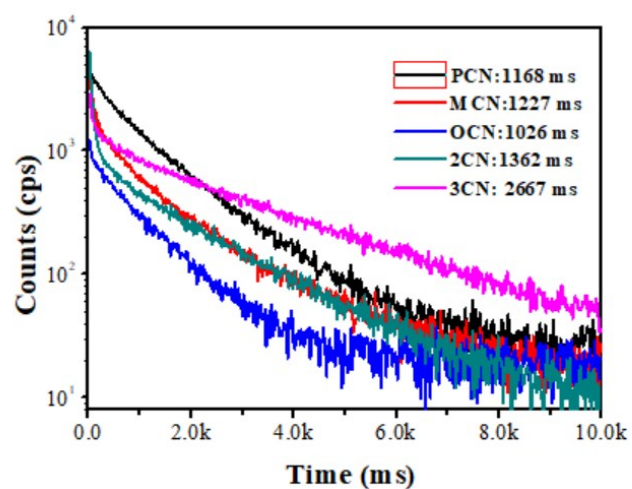

**Figure S11** Time-resolved emission decay curves of XCN crystal powder phosphorescence at 78 K.

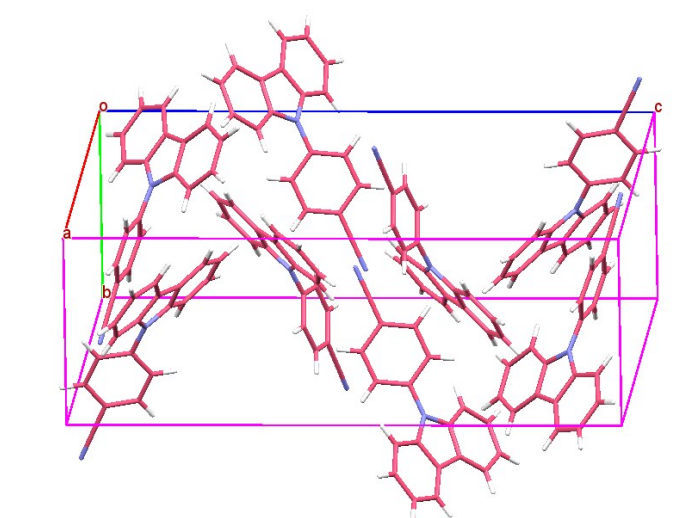

**Figure S12a** The unit cell of PCN single crystal.



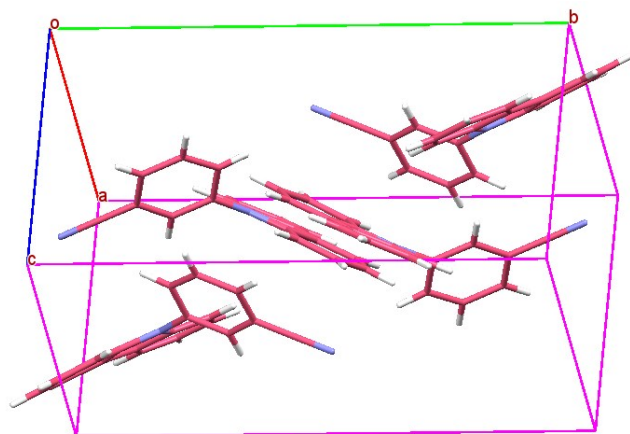

**Figure S12b** The unit cell of MCN single crystal.

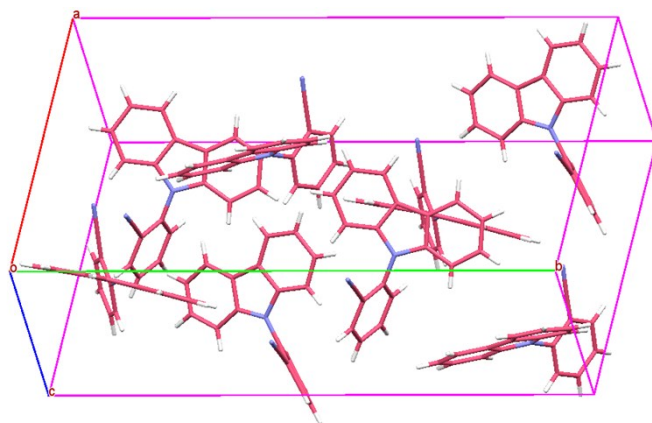

**Figure S12c** The unit cell of OCN single crystal.

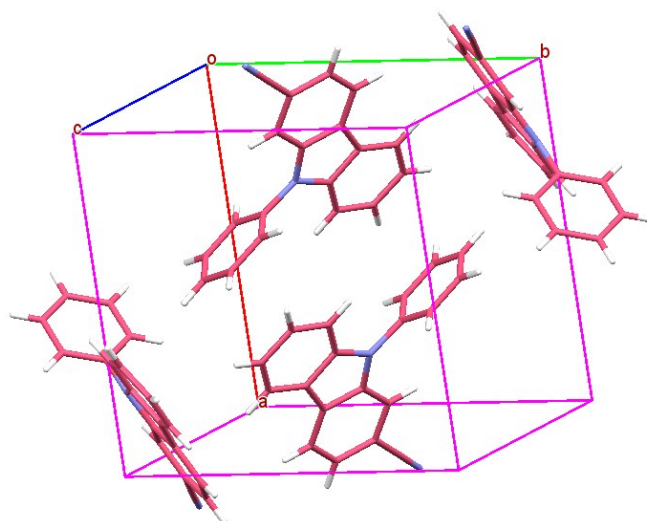

**Figure S12d** The unit cell of 2CN single crystal.

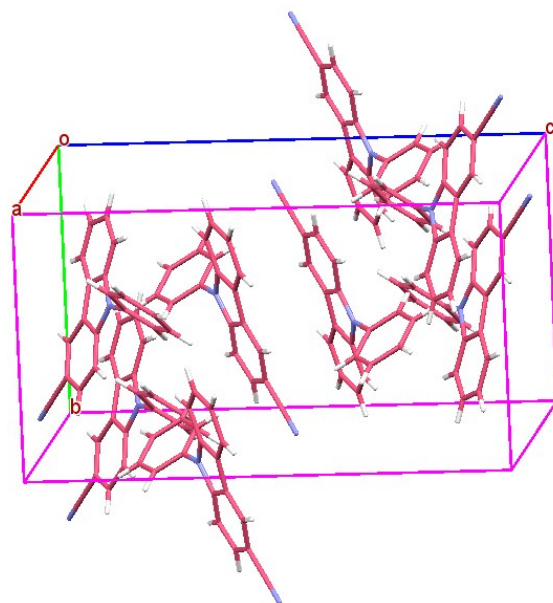

**Figure S12e** The unit cell of 3CN single crystal.

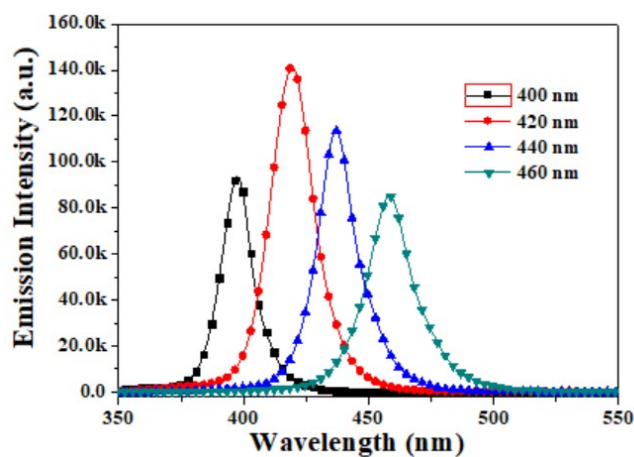

**Figure S13** The spectra of 400, 420, 440, and 460 nm visible-light detected by CCD spectrometer.

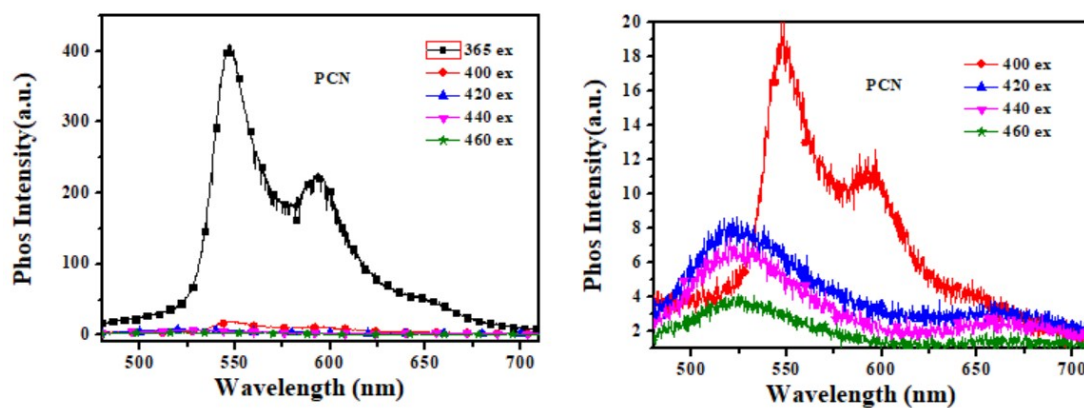

**Figure S14a** RTP spectra of PCN crystalline powder under the excitation of 365-460 nm. (The right side focuses on the curves of 400-460nm excitation.)

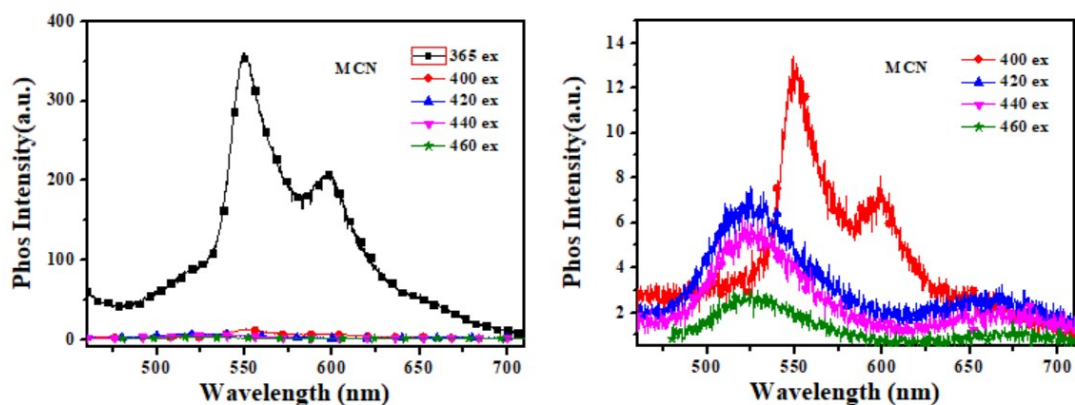

**Figure S14b** RTP spectra of MCN crystalline powder under the excitation of 365-460 nm. (The right side focuses on the curves of 400-460nm excitation.)

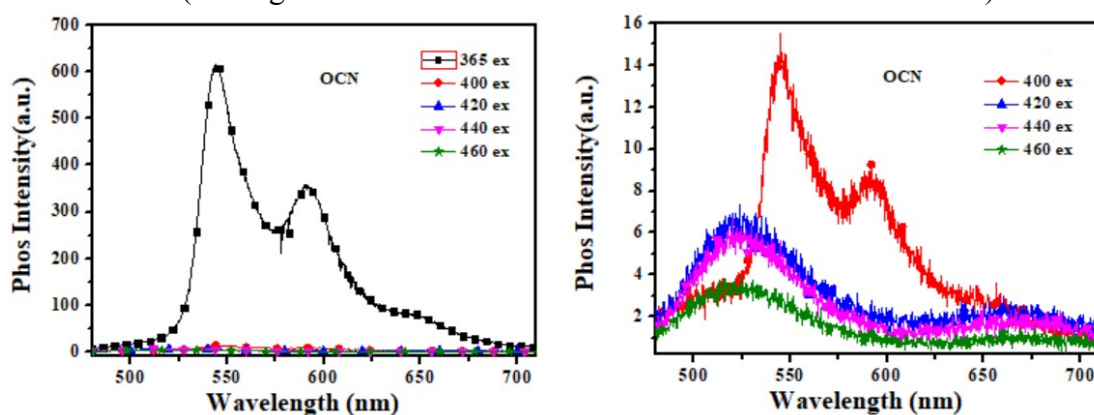

**Figure S14c** RTP spectra of OCN crystalline powder under the excitation of 365-460 nm. (The right side focuses on the curves of 400-460nm excitation.)

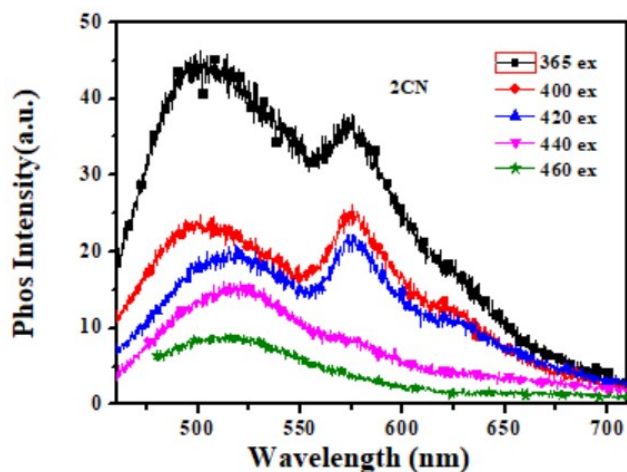

**Figure S14d** RTP spectra of 2CN crystalline powder under the excitation of 365-460 nm. (The right side focuses on the curves of 400-460nm excitation.)

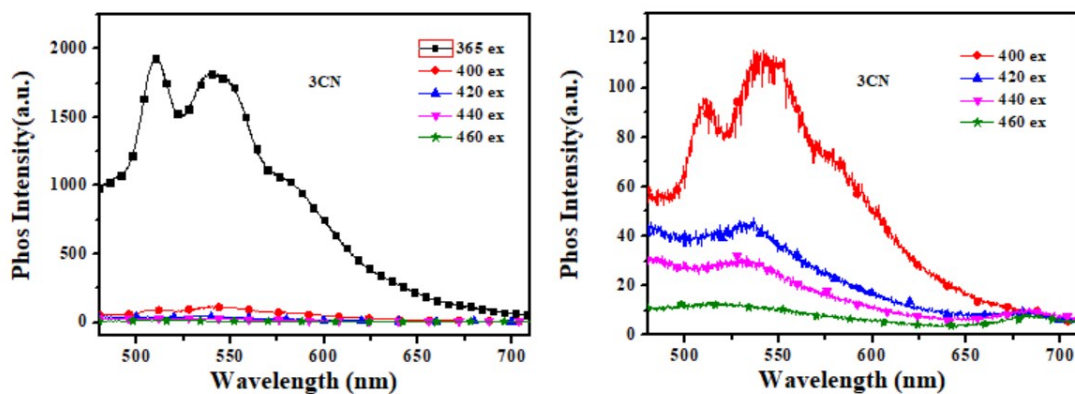

**Figure S14e** RTP spectra of 3CN crystalline powder under the excitation of 365-460 nm. (The right side focuses on the curves of 400-460nm excitation.)

|                     | PCN                 | MCN        | OCN       | 2CN       | 3CN        |
|---------------------|---------------------|------------|-----------|-----------|------------|
| 365 nm<br>UV on     |                     |            |           |           |            |
| 365 nm<br>UV off    | <br>$\tau_p$ 215 ms | <br>261 ms | <br>83 ms | <br>23 ms | <br>347 ms |
| 400 nm<br>light off | <br>166 ms          | <br>129 ms | <br>44 ms | <br>66 ms | <br>111 ms |
| 420 nm<br>light off | <br>69 ms           | <br>16 ms  | <br>8 ms  | <br>27 ms | <br>118 ms |
| 440 nm<br>light off | <br>19 ms           | <br>17 ms  | <br>8 ms  | <br>13 ms | <br>102 ms |
| 460 nm<br>light off | <br>9 ms            | <br>9 ms   | <br>5 ms  | <br>11 ms | <br>30 ms  |

**Figure S15** Photoluminescence photos of XCN crystalline powders upon exciting with 365 nm UV light and removing UV and visible excitation light. The labeled number is the RTP lifetimes ( $\tau$  in ms) under the excitation of different UV and visible light.

### 3. Tables

**Table S1a** Single crystal structural parameters of PCN.

| Compound reference                                              | colorless PCN crystal                                       |
|-----------------------------------------------------------------|-------------------------------------------------------------|
| Chemical formula                                                | C <sub>38</sub> H <sub>24</sub> N <sub>4</sub>              |
| Formula weight                                                  | 536.61                                                      |
| Crystal system                                                  | Monoclinic                                                  |
| <i>a</i> /Å                                                     | 15.265(8)                                                   |
| <i>b</i> /Å                                                     | 8.089(4)                                                    |
| <i>c</i> /Å                                                     | 22.642(12)                                                  |
| <i>α</i> /°                                                     | 90.00                                                       |
| <i>β</i> /°                                                     | 92.613(11)                                                  |
| <i>γ</i> /°                                                     | 90                                                          |
| Unit cell volume/ Å <sup>3</sup>                                | 2793(3)                                                     |
| Temperature/K                                                   | 100                                                         |
| Space group                                                     | P2(1)/c                                                     |
| Z                                                               | 8                                                           |
| Density (calculated) /g cm <sup>-3</sup>                        | 1.276                                                       |
| F(000)                                                          | 1120.0                                                      |
| Theta range for data collection                                 | 2.290 to 24.995 deg.                                        |
| Index ranges                                                    | -15<= <i>h</i> <=18, -9<= <i>k</i> <=9, -26<= <i>l</i> <=25 |
| Absorption correction                                           | Semi-empirical from equivalents                             |
| Max. and min. transmission                                      | 0.984 and 0.988                                             |
| Refinement method                                               | Full-matrix least-squares on <i>F</i> <sup>2</sup>          |
| Goodness-of-fit on <i>F</i> <sup>2</sup>                        | 0.993                                                       |
| Final <i>R</i> <sub>I</sub> values ( <i>I</i> > 2σ( <i>I</i> )) | 0.0457                                                      |
| Final <i>wR</i> ( <i>F</i> <sup>2</sup> ) values (all data)     | 0.1276                                                      |
| CCDC number                                                     | 193260                                                      |

**Table S1b** Single crystal structural parameters of MCN.

| Compound reference | colorless MCN crystal                          |
|--------------------|------------------------------------------------|
| Chemical formula   | C <sub>19</sub> H <sub>12</sub> N <sub>2</sub> |
| Formula weight     | 268.31                                         |
| Crystal system     | Monoclinic                                     |
| <i>a</i> /Å        | 10.2050(3)                                     |
| <i>b</i> /Å        | 15.8800(5)                                     |
| <i>c</i> /Å        | 8.5080(7)                                      |
| <i>α</i> /°        | 90.00                                          |
| <i>β</i> /°        | 92.80(4)                                       |

|                                             |                                    |
|---------------------------------------------|------------------------------------|
| $\gamma/^\circ$                             | 90.00                              |
| Unit cell volume/ $\text{\AA}^3$            | 1377.12(13)                        |
| Temperature/K                               | 293                                |
| Space group                                 | P21/c                              |
| Z                                           | 4                                  |
| Density (calculated) /g cm <sup>-3</sup>    | 1.294                              |
| F(000)                                      | 560.0                              |
| Theta range for data collection             | 2.00 to 25.09 deg.                 |
| Index ranges                                | -12<=h<=10, -15<=k<=18, -10<=l<=10 |
| Reflections measured                        | 6921                               |
| Independent reflections                     | 2444                               |
| $R_{int}$                                   | 0.1004                             |
| Completeness to theta = 25.09°              | 99.9 %                             |
| Absorption correction                       | Semi-empirical from equivalents    |
| Max. and min. transmission                  | 0.9870 and 0.9780                  |
| Refinement method                           | Full-matrix least-squares on $F^2$ |
| Data / restraints / parameters              | 2444 / 0 / 190                     |
| Goodness-of-fit on $F^2$                    | 0.964                              |
| Final $R_I$ values ( $I > 2\sigma(I)$ )     | 0.0636                             |
| Final $wR(F^2)$ values ( $I > 2\sigma(I)$ ) | 0.1199                             |
| Final $R_I$ values (all data)               | 0.2031                             |
| Final $wR(F^2)$ values (all data)           | 0.1715                             |
| CCDC number                                 | 1918561                            |

**Table S1c** Single crystal structural parameters of OCN.

|                                          |                                                |
|------------------------------------------|------------------------------------------------|
| Compound reference                       | colorless OCN crystal                          |
| Chemical formula                         | C <sub>19</sub> H <sub>12</sub> N <sub>2</sub> |
| Formula weight                           | 268.32                                         |
| Crystal system                           | orthorhombic                                   |
| $a/\text{\AA}$                           | 14.7314(14)                                    |
| $b/\text{\AA}$                           | 24.585(2)                                      |
| $c/\text{\AA}$                           | 8.0451(8)                                      |
| $\alpha/^\circ$                          | 90.00                                          |
| $\beta/^\circ$                           | 90.00                                          |
| $\gamma/^\circ$                          | 90.00                                          |
| Unit cell volume/ $\text{\AA}^3$         | 2913.7(5)                                      |
| Temperature/K                            | 296                                            |
| Space group                              | I 2 -2c                                        |
| Z                                        | 8                                              |
| Density (calculated) /g cm <sup>-3</sup> | 1.223                                          |
| F(000)                                   | 1120                                           |
| Index ranges                             | -19<=h<=18, -32<=k<=24, -10<=l<=10             |

|                                         |                                    |
|-----------------------------------------|------------------------------------|
| Absorption correction                   | Semi-empirical from equivalents    |
| Max. and min. transmission              | 0.984 and 0.988                    |
| Refinement method                       | Full-matrix least-squares on $F^2$ |
| Data / restraints / parameters          | 3248 / 1 / 190                     |
| Goodness-of-fit on $F^2$                | 0.968                              |
| Final $R_I$ values ( $I > 2\sigma(I)$ ) | 0.0411                             |
| Final $R_I$ values (all data)           | 0.1137                             |
| CCDC number                             | 1918562                            |

**Table S1d** Single crystal structural parameters of 2CN.

| Compound reference                          | colorless 2CN crystal                                              |
|---------------------------------------------|--------------------------------------------------------------------|
| Chemical formula                            | $C_{19}H_{12}N_2$                                                  |
| Formula weight                              | 268.32                                                             |
| Crystal system                              | Monoclinic                                                         |
| $a/\text{\AA}$                              | 11.1664(15)                                                        |
| $b/\text{\AA}$                              | 11.040(4)                                                          |
| $c/\text{\AA}$                              | 11.208(4)                                                          |
| $\alpha/^\circ$                             | 90.00                                                              |
| $\beta/^\circ$                              | 98.792(6)                                                          |
| $\gamma/^\circ$                             | 90.00                                                              |
| Unit cell volume/ $\text{\AA}^3$            | 1365.4(7)                                                          |
| Temperature/K                               | 100                                                                |
| Space group                                 | P2(1)/c                                                            |
| Z                                           | 4                                                                  |
| Density (calculated) / $\text{g cm}^{-3}$   | 1.305                                                              |
| F(000)                                      | 560.0                                                              |
| Theta range for data collection             | 1.85 to 24.99 deg.                                                 |
| Index ranges                                | $-10 \leq h \leq 13$ , $-13 \leq k \leq 11$ , $-12 \leq l \leq 13$ |
| Reflections measured                        | 6715                                                               |
| Independent reflections                     | 2400                                                               |
| $R_{int}$                                   | 0.0451                                                             |
| Completeness to theta = 24.99°              | 99.9 %                                                             |
| Absorption correction                       | Semi-empirical from equivalents                                    |
| Max. and min. transmission                  | 0.9869 and 0.9786                                                  |
| Refinement method                           | Full-matrix least-squares on $F^2$                                 |
| Data / restraints / parameters              | 2400 / 0 / 191                                                     |
| Goodness-of-fit on $F^2$                    | 1.004                                                              |
| Final $R_I$ values ( $I > 2\sigma(I)$ )     | 0.0424                                                             |
| Final $wR(F^2)$ values ( $I > 2\sigma(I)$ ) | 0.0843                                                             |
| Final $R_I$ values (all data)               | 0.0723                                                             |
| Final $wR(F^2)$ values (all data)           | 0.0942                                                             |
| CCDC number                                 | 1917793                                                            |

**Table S1e** Single crystal structural parameters of 3CN.

| Compound reference                                                            | colorless 3CN crystal                                        |
|-------------------------------------------------------------------------------|--------------------------------------------------------------|
| Chemical formula                                                              | C <sub>19</sub> H <sub>12</sub> N <sub>2</sub>               |
| Formula weight                                                                | 268.31                                                       |
| Crystal system                                                                | Monoclinic                                                   |
| <i>a</i> /Å                                                                   | 13.648(3)                                                    |
| <i>b</i> /Å                                                                   | 10.5450(10)                                                  |
| <i>c</i> /Å                                                                   | 18.9249(8)                                                   |
| $\alpha$ /°                                                                   | 90.00                                                        |
| $\beta$ /°                                                                    | 92.28(3)                                                     |
| $\gamma$ /°                                                                   | 90.00                                                        |
| Unit cell volume/ Å <sup>3</sup>                                              | 2721.4(6)                                                    |
| Temperature/K                                                                 | 100                                                          |
| Space group                                                                   | C2/c                                                         |
| Z                                                                             | 8                                                            |
| Density (calculated) /g cm <sup>-3</sup>                                      | 1.310                                                        |
| F(000)                                                                        | 1120                                                         |
| Theta range for data collection                                               | 2.15 to 25.00 deg.                                           |
| Index ranges                                                                  | -16<= <i>h</i> <=15, -7<= <i>k</i> <=12, -21<= <i>l</i> <=22 |
| Reflections measured                                                          | 6431                                                         |
| Independent reflections                                                       | 2387                                                         |
| <i>R</i> <sub>int</sub>                                                       | 0.0369                                                       |
| Completeness to theta = 25.00°                                                | 99.2 %                                                       |
| Absorption correction                                                         | Semi-empirical from equivalents                              |
| Max. and min. transmission                                                    | 0.9838 and 0.9777                                            |
| Refinement method                                                             | Full-matrix least-squares on <i>F</i> <sup>2</sup>           |
| Data / restraints / parameters                                                | 2387 / 0 / 179                                               |
| Goodness-of-fit on <i>F</i> <sup>2</sup>                                      | 1.086                                                        |
| Final <i>R</i> <sub>1</sub> values ( <i>I</i> > 2σ( <i>I</i> ))               | 0.0499                                                       |
| Final <i>wR</i> ( <i>F</i> <sup>2</sup> ) values ( <i>I</i> > 2σ( <i>I</i> )) | 0.1323                                                       |
| Final <i>R</i> <sub>1</sub> values (all data)                                 | 0.0736                                                       |
| Final <i>wR</i> ( <i>F</i> <sup>2</sup> ) values (all data)                   | 0.1476                                                       |
| CCDC number                                                                   | 1918555                                                      |



**Table S2** The NTOs of XCN.

| NAME | MOLECULE                                                                            | HOMO                                                                                | LUMO                                                                                  |
|------|-------------------------------------------------------------------------------------|-------------------------------------------------------------------------------------|---------------------------------------------------------------------------------------|
| PCN  | 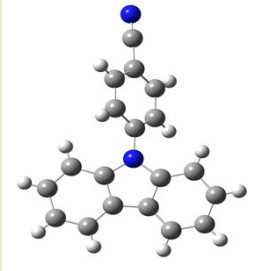   |    |    |
| MCN  |    |    |    |
| OCN  |   |   |   |
| 2CN  |  |  |  |

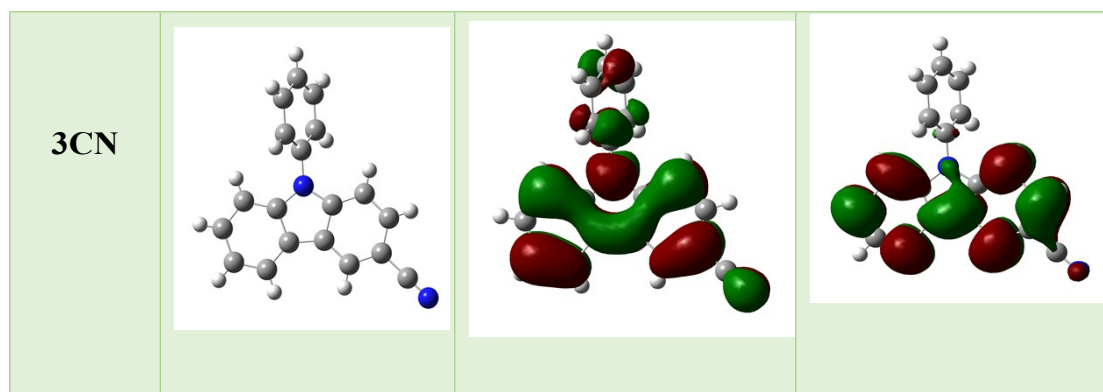

**Table S3a** The singlet and triplet excited state transition configurations of the PCN from single crystal revealed by TD-DFT calculations. The matched excited states that contain the same orbital transition components of  $S_1$  and  $|S_1-T_n| < 0.3$  eV were highlighted in red. (for the upper interacted pair in Figure 5)

|                  | n         | Energy           | Orbitals           | Transition  |
|------------------|-----------|------------------|--------------------|-------------|
| $S_n$            | $S_1$     | 3.6573 eV        | HOMO -> LUMO+1     | 0.989908922 |
| $T_n$            | $T_1$     | 3.1875 eV        | HOMO-13 -> LUMO+7  | 0.020624805 |
|                  |           |                  | HOMO-10 -> LUMO+1  | 0.111665928 |
|                  |           |                  | HOMO-1 -> LUMO+1   | 0.788366131 |
|                  | $T_2$     | 3.2256 eV        | HOMO-15 -> LUMO+4  | 0.024513408 |
|                  |           |                  | HOMO-11 -> LUMO    | 0.138211789 |
|                  |           |                  | HOMO-2 -> LUMO     | 0.76120525  |
|                  | $T_3$     | 3.2404 eV        | HOMO-12 -> LUMO+8  | 0.039564845 |
|                  |           |                  | HOMO-9 -> LUMO+2   | 0.123444867 |
|                  |           |                  | HOMO -> LUMO+2     | 0.721248541 |
|                  | $T_4$     | 3.3204 eV        | HOMO -> LUMO+5     | 0.03641221  |
|                  |           |                  | HOMO-14 -> LUMO+16 | 0.025669248 |
|                  |           |                  | HOMO-7 -> LUMO+6   | 0.027018826 |
|                  |           |                  | HOMO-7 -> LUMO+13  | 0.021565491 |
|                  |           |                  | HOMO-4 -> LUMO+4   | 0.274125697 |
|                  |           |                  | HOMO-4 -> LUMO+6   | 0.37672936  |
|                  |           |                  | HOMO-4 -> LUMO+7   | 0.022945104 |
|                  | $T_5$     | 3.3239 eV        | HOMO-1 -> LUMO+10  | 0.110873405 |
|                  |           |                  | HOMO-17 -> LUMO+15 | 0.030514381 |
|                  |           |                  | HOMO-8 -> LUMO+3   | 0.047765223 |
|                  |           |                  | HOMO-8 -> LUMO+12  | 0.024784285 |
| HOMO-5 -> LUMO+3 |           |                  | 0.660721106        |             |
| HOMO-2 -> LUMO+3 |           |                  | 0.037741034        |             |
| $T_6$            | 3.3249 eV | HOMO-2 -> LUMO+9 | 0.119394298        |             |
|                  |           |                  | HOMO-6 -> LUMO+5   | 0.0435125   |

|  |                 |           |                   |             |
|--|-----------------|-----------|-------------------|-------------|
|  |                 |           | HOMO-6 -> LUMO+14 | 0.020168353 |
|  |                 |           | HOMO-3 -> LUMO+5  | 0.597127776 |
|  |                 |           | HOMO-3 -> LUMO+7  | 0.048105816 |
|  |                 |           | HOMO -> LUMO+5    | 0.043418151 |
|  |                 |           | HOMO -> LUMO+11   | 0.112461274 |
|  | T <sub>7</sub>  | 3.4314 eV | HOMO-6 -> LUMO+11 | 0.029616912 |
|  |                 |           | HOMO-3 -> LUMO+5  | 0.038536432 |
|  |                 |           | HOMO -> LUMO+1    | 0.031330051 |
|  |                 |           | HOMO -> LUMO+2    | 0.029758241 |
|  |                 |           | HOMO -> LUMO+5    | 0.723027175 |
|  |                 |           | HOMO -> LUMO+7    | 0.059781904 |
|  | T <sub>8</sub>  | 3.4742 eV | HOMO-8 -> LUMO+9  | 0.032681018 |
|  |                 |           | HOMO-5 -> LUMO+3  | 0.033493896 |
|  |                 |           | HOMO-2 -> LUMO+3  | 0.843129037 |
|  | T <sub>9</sub>  | 3.4952 eV | HOMO-7 -> LUMO+10 | 0.032543107 |
|  |                 |           | HOMO-1 -> LUMO+4  | 0.365068035 |
|  |                 |           | HOMO-1 -> LUMO+6  | 0.464995105 |
|  |                 |           | HOMO-1 -> LUMO+7  | 0.023405825 |
|  | T <sub>10</sub> | 3.6638 eV | HOMO -> LUMO+1    | 0.942921514 |
|  |                 |           | HOMO -> LUMO+5    | 0.039683079 |
|  | T <sub>11</sub> | 3.7330 eV | HOMO-1 -> LUMO    | 0.991598114 |
|  | T <sub>12</sub> | 3.8293 eV | HOMO -> LUMO      | 0.996872    |
|  | T <sub>13</sub> | 3.9764 eV | HOMO-10 -> LUMO+7 | 0.024650881 |
|  |                 |           | HOMO-4 -> LUMO+1  | 0.148327258 |
|  |                 |           | HOMO-1 -> LUMO+2  | 0.029660737 |
|  |                 |           | HOMO-1 -> LUMO+5  | 0.102949069 |
|  |                 |           | HOMO-1 -> LUMO+7  | 0.582573768 |
|  | T <sub>14</sub> | 3.9796 eV | HOMO-10 -> LUMO+1 | 0.029587714 |
|  |                 |           | HOMO-4 -> LUMO+1  | 0.663505921 |
|  |                 |           | HOMO-1 -> LUMO+5  | 0.026394829 |
|  |                 |           | HOMO-1 -> LUMO+7  | 0.148556103 |
|  | T <sub>15</sub> | 4.0090 eV | HOMO-11 -> LUMO   | 0.020543645 |
|  |                 |           | HOMO-11 -> LUMO+4 | 0.027626602 |
|  |                 |           | HOMO-2 -> LUMO+4  | 0.587874931 |
|  |                 |           | HOMO-2 -> LUMO+6  | 0.235902067 |
|  | T <sub>16</sub> | 4.0322 eV | HOMO-16 -> LUMO+7 | 0.02004002  |
|  |                 |           | HOMO-13 -> LUMO+7 | 0.076745784 |
|  |                 |           | HOMO-10 -> LUMO+1 | 0.222791475 |
|  |                 |           | HOMO-4 -> LUMO+1  | 0.063810209 |
|  |                 |           | HOMO-3 -> LUMO+1  | 0.273030941 |

|  |                 |           |                   |             |
|--|-----------------|-----------|-------------------|-------------|
|  |                 |           | HOMO-3 -> LUMO+2  | 0.031415218 |
|  |                 |           | HOMO-1 -> LUMO+1  | 0.067315143 |
|  |                 |           | HOMO-1 -> LUMO+13 | 0.021611205 |
|  |                 |           | HOMO -> LUMO+8    | 0.030277683 |
|  |                 |           | HOMO -> LUMO+11   | 0.02738268  |
|  | T <sub>17</sub> | 4.0403 eV | HOMO-13 -> LUMO+7 | 0.04639058  |
|  |                 |           | HOMO-10 -> LUMO+1 | 0.137592088 |
|  |                 |           | HOMO-4 -> LUMO+1  | 0.026033056 |
|  |                 |           | HOMO-3 -> LUMO+1  | 0.259473672 |
|  |                 |           | HOMO-3 -> LUMO+2  | 0.043778405 |
|  |                 |           | HOMO-3 -> LUMO+5  | 0.033862429 |
|  |                 |           | HOMO-1 -> LUMO+1  | 0.043247405 |
|  |                 |           | HOMO -> LUMO+8    | 0.176976802 |
|  |                 |           | HOMO -> LUMO+11   | 0.069504833 |
|  | T <sub>18</sub> | 4.0451 eV | HOMO-15 -> LUMO+4 | 0.094569005 |
|  |                 |           | HOMO-15 -> LUMO+6 | 0.052022477 |
|  |                 |           | HOMO-11 -> LUMO   | 0.293868445 |
|  |                 |           | HOMO-5 -> LUMO    | 0.219466375 |
|  |                 |           | HOMO-2 -> LUMO    | 0.10765728  |
|  |                 |           | HOMO-2 -> LUMO+4  | 0.04749362  |
|  |                 |           | HOMO-2 -> LUMO+12 | 0.042649522 |
|  | T <sub>19</sub> | 4.0527 eV | HOMO-12 -> LUMO+8 | 0.061236001 |
|  |                 |           | HOMO-9 -> LUMO+2  | 0.123773026 |
|  |                 |           | HOMO-9 -> LUMO+8  | 0.035420573 |
|  |                 |           | HOMO-3 -> LUMO+1  | 0.122690765 |
|  |                 |           | HOMO-3 -> LUMO+2  | 0.055231585 |
|  |                 |           | HOMO -> LUMO+2    | 0.05359538  |
|  |                 |           | HOMO -> LUMO+8    | 0.430814749 |
|  | T <sub>20</sub> | 4.0658 eV | HOMO-12 -> LUMO+8 | 0.145767602 |
|  |                 |           | HOMO-9 -> LUMO+2  | 0.224798535 |
|  |                 |           | HOMO-6 -> LUMO+11 | 0.020044024 |
|  |                 |           | HOMO-3 -> LUMO+1  | 0.140821245 |
|  |                 |           | HOMO -> LUMO+2    | 0.095283586 |
|  |                 |           | HOMO -> LUMO+8    | 0.199749922 |
|  |                 |           | HOMO -> LUMO+14   | 0.036628418 |
|  | T <sub>21</sub> | 4.0738 eV | HOMO-15 -> LUMO+4 | 0.031330051 |
|  |                 |           | HOMO-11 -> LUMO   | 0.08910109  |
|  |                 |           | HOMO-5 -> LUMO    | 0.503767069 |
|  |                 |           | HOMO-5 -> LUMO+3  | 0.059781904 |
|  |                 |           | HOMO-4 -> LUMO    | 0.157966963 |

|                   |                 |           |                   |             |
|-------------------|-----------------|-----------|-------------------|-------------|
|                   |                 |           | HOMO-2 -> LUMO    | 0.024257234 |
|                   |                 |           | HOMO-2 -> LUMO+9  | 0.040237171 |
|                   | T <sub>22</sub> | 4.0998 eV | HOMO-11 -> LUMO   | 0.023709709 |
|                   |                 |           | HOMO-5 -> LUMO    | 0.0852845   |
|                   |                 |           | HOMO-4 -> LUMO    | 0.833882808 |
|                   | T <sub>23</sub> | 4.1142 eV | HOMO-6 -> LUMO+5  | 0.034974835 |
|                   |                 |           | HOMO-3 -> LUMO+1  | 0.179844034 |
|                   |                 |           | HOMO-3 -> LUMO+2  | 0.16097138  |
|                   |                 |           | HOMO-3 -> LUMO+5  | 0.17119441  |
|                   |                 |           | HOMO -> LUMO+8    | 0.062565994 |
|                   |                 |           | HOMO -> LUMO+11   | 0.268439299 |
|                   | T <sub>24</sub> | 4.1199 eV | HOMO-2 -> LUMO+1  | 0.978740405 |
|                   | T <sub>25</sub> | 4.1429 eV | HOMO-8 -> LUMO+3  | 0.108196216 |
|                   |                 |           | HOMO-8 -> LUMO+12 | 0.025896328 |
|                   |                 |           | HOMO-5 -> LUMO    | 0.10758305  |
|                   |                 |           | HOMO-5 -> LUMO+3  | 0.13718322  |
|                   |                 |           | HOMO-2 -> LUMO+9  | 0.450091744 |
|                   |                 |           | HOMO-1 -> LUMO+3  | 0.033405955 |
|                   |                 |           | HOMO-1 -> LUMO+10 | 0.027289152 |
|                   | T <sub>26</sub> | 4.1439 eV | HOMO-7 -> LUMO+4  | 0.033883251 |
| HOMO-7 -> LUMO+6  |                 |           | 0.047296577       |             |
| HOMO-7 -> LUMO+13 |                 |           | 0.021441063       |             |
| HOMO-4 -> LUMO+4  |                 |           | 0.06444768        |             |
| HOMO-4 -> LUMO+6  |                 |           | 0.070703041       |             |
| HOMO-3 -> LUMO+2  |                 |           | 0.053687091       |             |
| HOMO-2 -> LUMO+9  |                 |           | 0.034432128       |             |
| HOMO-1 -> LUMO+2  |                 |           | 0.06802885        |             |
| HOMO-1 -> LUMO+3  |                 |           | 0.044988001       |             |
| HOMO-1 -> LUMO+9  |                 |           | 0.025864477       |             |
| HOMO-1 -> LUMO+10 |                 |           | 0.367893264       |             |

**Table S3b** The singlet and triplet excited state transition configurations of the MCN from single crystal revealed by TD-DFT calculations. The matched excited states that contain the same orbital transition components of S<sub>1</sub> and |S<sub>1</sub>-T<sub>n</sub>| < 0.3 eV were highlighted in red. (for the upper interacted pair in Figure 5)

|                | n              | Energy    | Orbitals          | Transition |
|----------------|----------------|-----------|-------------------|------------|
| S <sub>n</sub> | S <sub>1</sub> | 3.3343 eV | HOMO -> LUMO+1    | 0.990134   |
| T <sub>n</sub> | T <sub>1</sub> | 3.0751 eV | HOMO-10 -> LUMO+1 | 0.067602   |
|                |                |           | HOMO -> LUMO+1    | 0.860856   |

|                 |           |                   |          |
|-----------------|-----------|-------------------|----------|
| T <sub>2</sub>  | 3.1424 eV | HOMO-11 -> LUMO   | 0.0941   |
|                 |           | HOMO-1 -> LUMO    | 0.824688 |
| T <sub>3</sub>  | 3.2895 eV | HOMO-9 -> LUMO+2  | 0.157843 |
|                 |           | HOMO-2 -> LUMO+2  | 0.673078 |
|                 |           | HOMO-2 -> LUMO+7  | 0.022659 |
| T <sub>4</sub>  | 3.3550 eV | HOMO-6 -> LUMO+8  | 0.026982 |
|                 |           | HOMO-3 -> LUMO+2  | 0.031757 |
|                 |           | HOMO-3 -> LUMO+6  | 0.02837  |
|                 |           | HOMO-3 -> LUMO+7  | 0.148175 |
|                 |           | HOMO-3 -> LUMO+8  | 0.430945 |
|                 |           | HOMO -> LUMO+7    | 0.02749  |
|                 |           | HOMO -> LUMO+8    | 0.080096 |
| T <sub>5</sub>  | 3.3615 eV | HOMO -> LUMO+11   | 0.082004 |
|                 |           | HOMO-5 -> LUMO+3  | 0.30948  |
|                 |           | HOMO-5 -> LUMO+6  | 0.169875 |
|                 |           | HOMO-5 -> LUMO+7  | 0.036943 |
|                 |           | HOMO-2 -> LUMO    | 0.043784 |
|                 |           | HOMO-2 -> LUMO+3  | 0.105809 |
|                 |           | HOMO-2 -> LUMO+6  | 0.04984  |
| T <sub>6</sub>  | 3.3653 eV | HOMO-2 -> LUMO+9  | 0.070861 |
|                 |           | HOMO-7 -> LUMO+5  | 0.038464 |
|                 |           | HOMO-4 -> LUMO+5  | 0.588678 |
|                 |           | HOMO-4 -> LUMO+6  | 0.060998 |
|                 |           | HOMO-1 -> LUMO+5  | 0.133541 |
| T <sub>7</sub>  | 3.4734 eV | HOMO-1 -> LUMO+10 | 0.085864 |
|                 |           | HOMO-5 -> LUMO+3  | 0.110102 |
|                 |           | HOMO-5 -> LUMO+6  | 0.061299 |
|                 |           | HOMO-2 -> LUMO    | 0.144625 |
|                 |           | HOMO-2 -> LUMO+1  | 0.032748 |
|                 |           | HOMO-2 -> LUMO+3  | 0.299244 |
| T <sub>8</sub>  | 3.4902 eV | HOMO-2 -> LUMO+6  | 0.150755 |
|                 |           | HOMO-3 -> LUMO+8  | 0.044934 |
|                 |           | HOMO -> LUMO+2    | 0.549236 |
|                 |           | HOMO -> LUMO+4    | 0.044176 |
|                 |           | HOMO -> LUMO+7    | 0.067609 |
| T <sub>9</sub>  | 3.5257 eV | HOMO -> LUMO+8    | 0.197871 |
|                 |           | HOMO-7 -> LUMO+10 | 0.031495 |
|                 |           | HOMO-4 -> LUMO+5  | 0.118011 |
| T <sub>10</sub> | 3.5619 eV | HOMO-1 -> LUMO+5  | 0.711911 |
|                 |           | HOMO-15 -> LUMO+4 | 0.026524 |

|  |                 |           |                   |          |
|--|-----------------|-----------|-------------------|----------|
|  |                 |           | HOMO-13 -> LUMO+1 | 0.023806 |
|  |                 |           | HOMO-12 -> LUMO+1 | 0.022016 |
|  |                 |           | HOMO-10 -> LUMO+1 | 0.05074  |
|  |                 |           | HOMO-2 -> LUMO+1  | 0.204723 |
|  |                 |           | HOMO -> LUMO+1    | 0.059154 |
|  |                 |           | HOMO -> LUMO+2    | 0.097629 |
|  |                 |           | HOMO -> LUMO+4    | 0.313664 |
|  |                 |           | HOMO -> LUMO+6    | 0.032855 |
|  |                 |           | HOMO -> LUMO+8    | 0.030224 |
|  | T <sub>11</sub> | 3.5942 eV | HOMO-2 -> LUMO    | 0.121702 |
|  |                 |           | HOMO-2 -> LUMO+1  | 0.407434 |
|  |                 |           | HOMO -> LUMO+2    | 0.174711 |
|  |                 |           | HOMO -> LUMO+4    | 0.045192 |
|  |                 |           | HOMO -> LUMO+7    | 0.029695 |
|  |                 |           | HOMO -> LUMO+8    | 0.12949  |
|  | T <sub>12</sub> | 3.6140 eV | HOMO-2 -> LUMO+1  | 0.05416  |
|  |                 |           | HOMO -> LUMO      | 0.843752 |
|  |                 |           | HOMO -> LUMO+8    | 0.028141 |
|  | T <sub>13</sub> | 3.6154 eV | HOMO-10 -> LUMO+1 | 0.020386 |
|  |                 |           | HOMO-2 -> LUMO    | 0.396317 |
|  |                 |           | HOMO-2 -> LUMO+3  | 0.060191 |
|  |                 |           | HOMO-2 -> LUMO+6  | 0.038442 |
|  |                 |           | HOMO -> LUMO      | 0.067624 |
|  |                 |           | HOMO -> LUMO+2    | 0.106667 |
|  |                 |           | HOMO -> LUMO+4    | 0.025142 |
|  |                 |           | HOMO -> LUMO+6    | 0.024651 |
|  |                 |           | HOMO -> LUMO+7    | 0.05391  |
|  |                 |           | HOMO -> LUMO+8    | 0.097382 |
|  | T <sub>14</sub> | 3.6286 eV | HOMO-2 -> LUMO    | 0.204058 |
|  |                 |           | HOMO-2 -> LUMO+1  | 0.240749 |
|  |                 |           | HOMO-2 -> LUMO+3  | 0.051784 |
|  |                 |           | HOMO-2 -> LUMO+6  | 0.03045  |
|  |                 |           | HOMO -> LUMO      | 0.065479 |
|  |                 |           | HOMO -> LUMO+2    | 0.049795 |
|  |                 |           | HOMO -> LUMO+4    | 0.061769 |
|  |                 |           | HOMO -> LUMO+6    | 0.033246 |
|  |                 |           | HOMO -> LUMO+7    | 0.041035 |
|  |                 |           | HOMO -> LUMO+8    | 0.051379 |
|  | T <sub>15</sub> | 3.6375 eV | HOMO-14 -> LUMO   | 0.086686 |
|  |                 |           | HOMO-14 -> LUMO+3 | 0.025783 |

|  |                 |           |                   |          |
|--|-----------------|-----------|-------------------|----------|
|  |                 |           | HOMO-11 -> LUMO   | 0.106657 |
|  |                 |           | HOMO-2 -> LUMO    | 0.042056 |
|  |                 |           | HOMO-1 -> LUMO    | 0.078543 |
|  |                 |           | HOMO-1 -> LUMO+3  | 0.223393 |
|  |                 |           | HOMO-1 -> LUMO+4  | 0.052767 |
|  |                 |           | HOMO-1 -> LUMO+6  | 0.191172 |
|  | T <sub>16</sub> | 3.7274 eV | HOMO-3 -> LUMO+1  | 0.930084 |
|  |                 |           | HOMO-13 -> LUMO+2 | 0.024381 |
|  |                 |           | HOMO-13 -> LUMO+7 | 0.02662  |
|  |                 |           | HOMO-12 -> LUMO+7 | 0.043306 |
|  |                 |           | HOMO-9 -> LUMO+2  | 0.18786  |
|  | T <sub>17</sub> | 3.7489 eV | HOMO-3 -> LUMO+1  | 0.040487 |
|  |                 |           | HOMO-2 -> LUMO+2  | 0.208968 |
|  |                 |           | HOMO-2 -> LUMO+4  | 0.035389 |
|  |                 |           | HOMO-2 -> LUMO+7  | 0.229476 |
|  |                 |           | HOMO-2 -> LUMO+8  | 0.04658  |
|  | T <sub>18</sub> | 3.8105 eV | HOMO-1 -> LUMO+1  | 0.979916 |
|  | T <sub>19</sub> | 3.8532 eV | HOMO-4 -> LUMO    | 0.960886 |
|  |                 |           | HOMO-3 -> LUMO    | 0.02254  |
|  | T <sub>20</sub> | 3.9135 eV | HOMO-3 -> LUMO+2  | 0.899409 |
|  |                 |           | HOMO-3 -> LUMO+8  | 0.021815 |
|  |                 |           | HOMO-13 -> LUMO+1 | 0.097038 |
|  |                 |           | HOMO-12 -> LUMO+1 | 0.118458 |
|  |                 |           | HOMO-10 -> LUMO+1 | 0.314678 |
|  | T <sub>21</sub> | 3.9279 eV | HOMO -> LUMO+1    | 0.023779 |
|  |                 |           | HOMO -> LUMO+4    | 0.19669  |
|  |                 |           | HOMO -> LUMO+6    | 0.044545 |
|  |                 |           | HOMO -> LUMO+7    | 0.02325  |
|  |                 |           | HOMO-11 -> LUMO   | 0.046275 |
|  | T <sub>22</sub> | 3.9446 eV | HOMO-5 -> LUMO    | 0.350737 |
|  |                 |           | HOMO-3 -> LUMO    | 0.475196 |
|  |                 |           | HOMO-1 -> LUMO+3  | 0.030224 |
|  |                 |           | HOMO-14 -> LUMO   | 0.103995 |
|  |                 |           | HOMO-11 -> LUMO   | 0.176228 |
|  |                 |           | HOMO-5 -> LUMO    | 0.059161 |
|  | T <sub>23</sub> | 3.9760 eV | HOMO-3 -> LUMO    | 0.3573   |
|  |                 |           | HOMO-1 -> LUMO+3  | 0.10855  |
|  |                 |           | HOMO-1 -> LUMO+6  | 0.068828 |
|  |                 |           | HOMO-5 -> LUMO+2  | 0.047333 |
|  | T <sub>24</sub> | 3.9969 eV | HOMO-1 -> LUMO+2  | 0.897693 |



|                  |                 |           |                   |          |
|------------------|-----------------|-----------|-------------------|----------|
|                  | T <sub>25</sub> | 4.0092 eV | HOMO-14 -> LUMO   | 0.078376 |
|                  |                 |           | HOMO-11 -> LUMO   | 0.074074 |
|                  |                 |           | HOMO-5 -> LUMO    | 0.53373  |
|                  |                 |           | HOMO-5 -> LUMO+1  | 0.021095 |
|                  |                 |           | HOMO-3 -> LUMO    | 0.134608 |
|                  |                 |           | HOMO-1 -> LUMO+3  | 0.044934 |
|                  |                 |           | HOMO-1 -> LUMO+6  | 0.029871 |
|                  | T <sub>26</sub> | 4.0210 eV | HOMO-13 -> LUMO+2 | 0.020293 |
|                  |                 |           | HOMO-9 -> LUMO+2  | 0.254341 |
|                  |                 |           | HOMO-5 -> LUMO+1  | 0.130234 |
|                  |                 |           | HOMO-5 -> LUMO+2  | 0.02576  |
|                  |                 |           | HOMO-2 -> LUMO+4  | 0.057027 |
|                  |                 |           | HOMO-2 -> LUMO+7  | 0.25815  |
|                  |                 |           | HOMO-2 -> LUMO+8  | 0.04585  |
| HOMO-1 -> LUMO+2 | 0.049342        |           |                   |          |

**Table S3c** The singlet and triplet excited state transition configurations of the OCN from single crystal revealed by TD-DFT calculations. The matched excited states that contain the same orbital transition components of S<sub>1</sub> and |S<sub>1</sub>-T<sub>n</sub>| < 0.3 eV were highlighted in red. (for the upper interacted pair in Figure 5)

|                  | n              | Energy        | Orbitals          | Transition  |
|------------------|----------------|---------------|-------------------|-------------|
| S <sub>n</sub>   | S <sub>1</sub> | 3.1569 eV     | HOMO -> LUMO+2    | 0.990078    |
|                  |                |               | HOMO -> LUMO+1    | 0.168954845 |
| T <sub>n</sub>   | T <sub>1</sub> | 3.0065 eV     | HOMO -> LUMO+2    | 0.915386    |
|                  | T <sub>2</sub> | 3.1089 eV     | HOMO-12 -> LUMO   | 0.03573     |
|                  |                |               | HOMO-3 -> LUMO    | 0.810035    |
|                  |                |               | HOMO-3 -> LUMO+3  | 0.033675    |
|                  |                |               | HOMO-1 -> LUMO    | 0.055738    |
|                  | T <sub>3</sub> | 3.1744 eV     | HOMO-10 -> LUMO+1 | 0.059175    |
|                  |                |               | HOMO-4 -> LUMO+7  | 0.020645    |
|                  |                |               | HOMO-3 -> LUMO+1  | 0.027683    |
|                  |                |               | HOMO-1 -> LUMO+1  | 0.784754    |
|                  |                |               | HOMO-1 -> LUMO+4  | 0.030564    |
|                  | T <sub>4</sub> | 3.2308 eV     | HOMO-5 -> LUMO+2  | 0.022485    |
|                  |                |               | HOMO-5 -> LUMO+4  | 0.158394    |
|                  |                |               | HOMO-5 -> LUMO+5  | 0.135721    |
|                  |                |               | HOMO-5 -> LUMO+6  | 0.39117     |
| HOMO-3 -> LUMO+9 |                |               | 0.084996          |             |
| T <sub>5</sub>   | 3.2316 eV      | HOMO-9 -> 231 | 0.022126          |             |

|  |                 |           |                   |          |
|--|-----------------|-----------|-------------------|----------|
|  |                 |           | HOMO-6 -> LUMO+8  | 0.038776 |
|  |                 |           | HOMO-2 -> LUMO+2  | 0.024798 |
|  |                 |           | HOMO-2 -> LUMO+8  | 0.710098 |
|  |                 |           | HOMO -> LUMO+8    | 0.022748 |
|  |                 |           | HOMO -> LUMO+11   | 0.098532 |
|  | T <sub>6</sub>  | 3.2450 eV | HOMO-7 -> LUMO+7  | 0.03337  |
|  |                 |           | HOMO-7 -> LUMO+13 | 0.020337 |
|  |                 |           | HOMO-4 -> LUMO+7  | 0.689725 |
|  |                 |           | HOMO-1 -> LUMO+1  | 0.032065 |
|  |                 |           | HOMO-1 -> LUMO+7  | 0.029539 |
|  |                 |           | HOMO-1 -> LUMO+10 | 0.092949 |
|  | T <sub>7</sub>  | 3.2897 eV | HOMO -> LUMO      | 0.986394 |
|  |                 |           | HOMO-14 -> LUMO+5 | 0.044665 |
|  |                 |           | HOMO-14 -> LUMO+6 | 0.027303 |
|  |                 |           | HOMO-11 -> LUMO+2 | 0.085913 |
|  |                 |           | HOMO-9 -> LUMO+2  | 0.022817 |
|  |                 |           | HOMO-3 -> LUMO+6  | 0.023766 |
|  |                 |           | HOMO -> LUMO+2    | 0.046885 |
|  |                 |           | HOMO -> LUMO+4    | 0.0621   |
|  |                 |           | HOMO -> LUMO+5    | 0.243658 |
|  |                 |           | HOMO -> LUMO+6    | 0.120816 |
|  |                 |           | HOMO -> LUMO+8    | 0.172848 |
|  |                 |           | HOMO-8 -> LUMO+9  | 0.027448 |
|  |                 |           | HOMO-3 -> LUMO+2  | 0.06097  |
|  |                 |           | HOMO-3 -> LUMO+3  | 0.104928 |
|  |                 |           | HOMO-3 -> LUMO+4  | 0.13053  |
|  |                 |           | HOMO-3 -> LUMO+5  | 0.110986 |
|  |                 |           | HOMO-3 -> LUMO+6  | 0.313268 |
|  |                 |           | HOMO -> LUMO+5    | 0.024642 |
|  |                 |           | HOMO-7 -> LUMO+10 | 0.034406 |
|  |                 |           | HOMO-4 -> LUMO+7  | 0.030022 |
|  |                 |           | HOMO-3 -> LUMO+7  | 0.025124 |
|  |                 |           | HOMO-1 -> LUMO+1  | 0.020845 |
|  |                 |           | HOMO-1 -> LUMO+4  | 0.058742 |
|  |                 |           | HOMO-1 -> LUMO+5  | 0.023091 |
|  |                 |           | HOMO-1 -> LUMO+7  | 0.728376 |
|  |                 |           | HOMO-2 -> LUMO+2  | 0.943718 |
|  |                 |           | HOMO-2 -> LUMO+8  | 0.02395  |
|  |                 |           | HOMO-14 -> LUMO+5 | 0.029132 |
|  |                 |           | HOMO-11 -> LUMO+2 | 0.084905 |
|  | T <sub>10</sub> | 3.4607 eV |                   |          |
|  | T <sub>11</sub> | 3.4741 eV |                   |          |
|  | T <sub>12</sub> | 3.5135 eV |                   |          |

|  |                 |           |                   |          |
|--|-----------------|-----------|-------------------|----------|
|  |                 |           | HOMO-9 -> LUMO+2  | 0.030199 |
|  |                 |           | HOMO-6 -> LUMO+11 | 0.024847 |
|  |                 |           | HOMO -> LUMO+5    | 0.025992 |
|  |                 |           | HOMO -> LUMO+6    | 0.033941 |
|  |                 |           | HOMO -> LUMO+8    | 0.641527 |
|  | T <sub>13</sub> | 3.5163 eV | HOMO-3 -> LUMO    | 0.023618 |
|  |                 |           | HOMO-3 -> LUMO+3  | 0.0221   |
|  |                 |           | HOMO-2 -> LUMO    | 0.85978  |
|  | T <sub>14</sub> | 3.5346 eV | HOMO-17 -> LUMO+3 | 0.103604 |
|  |                 |           | HOMO-16 -> LUMO   | 0.100477 |
|  |                 |           | HOMO-16 -> LUMO+3 | 0.021536 |
|  |                 |           | HOMO-12 -> LUMO   | 0.13439  |
|  |                 |           | HOMO-3 -> LUMO+3  | 0.213205 |
|  |                 |           | HOMO-3 -> LUMO+4  | 0.022126 |
|  |                 |           | HOMO-3 -> LUMO+6  | 0.043124 |
|  |                 |           | HOMO-2 -> LUMO    | 0.099102 |
|  |                 |           | HOMO-1 -> LUMO    | 0.151162 |
|  | T <sub>15</sub> | 3.5571 eV | HOMO-10 -> LUMO+1 | 0.039055 |
|  |                 |           | HOMO-5 -> LUMO    | 0.026381 |
|  |                 |           | HOMO-3 -> LUMO    | 0.078313 |
|  |                 |           | HOMO-3 -> LUMO+3  | 0.030396 |
|  |                 |           | HOMO-1 -> LUMO    | 0.651945 |
|  |                 |           | HOMO-1 -> LUMO+4  | 0.027219 |
|  | T <sub>16</sub> | 3.5581 eV | HOMO-15 -> LUMO+4 | 0.069527 |
|  |                 |           | HOMO-15 -> LUMO+5 | 0.029846 |
|  |                 |           | HOMO-13 -> LUMO+1 | 0.087697 |
|  |                 |           | HOMO-13 -> LUMO+4 | 0.033241 |
|  |                 |           | HOMO-10 -> LUMO+1 | 0.229097 |
|  |                 |           | HOMO-1 -> LUMO    | 0.105157 |
|  |                 |           | HOMO-1 -> LUMO+1  | 0.091566 |
|  |                 |           | HOMO-1 -> LUMO+4  | 0.132098 |
|  |                 |           | HOMO-1 -> LUMO+5  | 0.057576 |
|  |                 |           | HOMO-1 -> LUMO+7  | 0.05395  |
|  | T <sub>17</sub> | 3.5741 eV | HOMO -> LUMO+1    | 0.996928 |
|  | T <sub>18</sub> | 3.6201 eV | HOMO-5 -> LUMO    | 0.899623 |
|  |                 |           | HOMO-4 -> LUMO    | 0.034706 |
|  |                 |           | HOMO-1 -> LUMO    | 0.026986 |
|  | T <sub>19</sub> | 3.6905 eV | HOMO-3 -> LUMO+2  | 0.036213 |
|  |                 |           | HOMO-1 -> LUMO+2  | 0.92597  |
|  | T <sub>20</sub> | 3.7231 eV | HOMO-4 -> LUMO+1  | 0.907312 |

|  |                 |           |                   |          |
|--|-----------------|-----------|-------------------|----------|
|  |                 |           | HOMO-3 -> LUMO+1  | 0.045705 |
|  | T <sub>21</sub> | 3.7333 eV | HOMO-11 -> LUMO+2 | 0.110647 |
|  |                 |           | HOMO-9 -> LUMO+2  | 0.035288 |
|  |                 |           | HOMO-5 -> LUMO+2  | 0.032579 |
|  |                 |           | HOMO-3 -> LUMO+2  | 0.479455 |
|  |                 |           | HOMO-1 -> LUMO+2  | 0.045258 |
|  |                 |           | HOMO -> LUMO+4    | 0.022945 |
|  |                 |           | HOMO -> LUMO+5    | 0.090032 |
|  |                 |           | HOMO -> LUMO+6    | 0.0502   |
|  |                 |           | HOMO -> LUMO+8    | 0.020523 |
|  | T <sub>22</sub> | 3.7402 eV | HOMO-4 -> LUMO+1  | 0.046433 |
|  |                 |           | HOMO-3 -> LUMO+1  | 0.866665 |
|  |                 |           | HOMO-2 -> LUMO+1  | 0.020451 |
|  |                 |           | HOMO-1 -> LUMO+1  | 0.022206 |
|  | T <sub>23</sub> | 3.7591 eV | HOMO-11 -> LUMO+2 | 0.191296 |
|  |                 |           | HOMO-9 -> LUMO+2  | 0.063453 |
|  |                 |           | HOMO-5 -> LUMO+2  | 0.034144 |
|  |                 |           | HOMO-3 -> LUMO+2  | 0.364078 |
|  |                 |           | HOMO -> LUMO+4    | 0.031838 |
|  |                 |           | HOMO -> LUMO+5    | 0.114232 |
|  |                 |           | HOMO -> LUMO+6    | 0.050785 |
|  |                 |           | HOMO -> LUMO+8    | 0.024735 |
|  | T <sub>24</sub> | 3.8114 eV | HOMO-16 -> LUMO   | 0.149102 |
|  |                 |           | HOMO-12 -> LUMO   | 0.225389 |
|  |                 |           | HOMO-3 -> LUMO+3  | 0.403705 |
|  |                 |           | HOMO-3 -> LUMO+4  | 0.020084 |
|  |                 |           | HOMO-3 -> LUMO+6  | 0.032375 |
|  |                 |           | HOMO-1 -> LUMO+3  | 0.032994 |
|  | T <sub>25</sub> | 3.8168 eV | HOMO-3 -> LUMO+1  | 0.024465 |
|  |                 |           | HOMO-2 -> LUMO+1  | 0.970865 |
|  | T <sub>26</sub> | 3.8519 eV | HOMO-5 -> LUMO    | 0.036218 |
|  |                 |           | HOMO-4 -> LUMO    | 0.962661 |

**Table S3d** The singlet and triplet excited state transition configurations of the 2CN from single crystal revealed by TD-DFT calculations. The matched excited states that contain the same orbital transition components of S<sub>1</sub> and |S<sub>1</sub>-T<sub>n</sub>| < 0.3 eV were highlighted in red. (for the upper interacted pair in Figure 5)

|                | n              | Energy    | Orbitals     | Transition  |
|----------------|----------------|-----------|--------------|-------------|
| S <sub>n</sub> | S <sub>1</sub> | 3.5832 eV | HOMO -> LUMO | 0.814981445 |

|                  |                |                   |                  |             |
|------------------|----------------|-------------------|------------------|-------------|
|                  |                |                   | HOMO -> LUMO+1   | 0.168954845 |
| T <sub>n</sub>   | T <sub>1</sub> | 3.0024 eV         | HOMO-4 -> LUMO+1 | 0.110816904 |
|                  |                |                   | HOMO-4 -> LUMO+2 | 0.225227873 |
|                  |                |                   | HOMO-3 -> LUMO+1 | 0.45907362  |
|                  |                |                   | HOMO-3 -> LUMO+2 | 0.025859928 |
|                  |                |                   | HOMO-2 -> LUMO+1 | 0.030489682 |
|                  | T <sub>2</sub> | 3.0166 eV         | HOMO-5 -> LUMO   | 0.725747424 |
|                  |                |                   | HOMO-2 -> LUMO   | 0.134722023 |
|                  |                |                   | HOMO-2 -> LUMO+9 | 0.027584307 |
|                  | T <sub>3</sub> | 3.0353 eV         | HOMO-4 -> LUMO+1 | 0.333401448 |
|                  |                |                   | HOMO-3 -> LUMO+2 | 0.4522005   |
|                  |                |                   | HOMO-2 -> LUMO+2 | 0.036148227 |
|                  |                |                   | HOMO -> LUMO+11  | 0.022607885 |
|                  | T <sub>4</sub> | 3.0948 eV         | HOMO-5 -> LUMO   | 0.129448896 |
|                  |                |                   | HOMO-3 -> LUMO   | 0.050867741 |
|                  |                |                   | HOMO-2 -> LUMO   | 0.698916645 |
|                  |                |                   | HOMO-1 -> LUMO   | 0.050759352 |
|                  | T <sub>5</sub> | 3.1133 eV         | HOMO-1 -> LUMO+1 | 0.240901287 |
|                  |                |                   | HOMO-1 -> LUMO+2 | 0.145627251 |
|                  |                |                   | HOMO -> LUMO+1   | 0.509504746 |
|                  | T <sub>6</sub> | 3.1600 eV         | HOMO-1 -> LUMO+1 | 0.26509393  |
|                  |                |                   | HOMO-1 -> LUMO+2 | 0.074783914 |
|                  |                |                   | HOMO -> LUMO+1   | 0.088831125 |
|                  |                |                   | HOMO -> LUMO+2   | 0.510757245 |
|                  | T <sub>7</sub> | 3.5883 eV         | HOMO -> LUMO     | 0.95579138  |
|                  | T <sub>8</sub> | 3.6983 eV         | HOMO-1 -> LUMO   | 0.095922    |
|                  |                |                   | HOMO-1 -> LUMO+1 | 0.258020545 |
|                  |                |                   | HOMO-1 -> LUMO+2 | 0.094499434 |
|                  |                |                   | HOMO -> LUMO     | 0.022459282 |
|                  |                |                   | HOMO -> LUMO+1   | 0.266829735 |
|                  |                |                   | HOMO -> LUMO+2   | 0.234297506 |
|                  | T <sub>9</sub> | 3.7449 eV         | HOMO-2 -> LUMO   | 0.049524339 |
|                  |                |                   | HOMO-1 -> LUMO   | 0.781900135 |
| HOMO-1 -> LUMO+1 |                |                   | 0.089811696      |             |
| HOMO -> LUMO+2   |                |                   | 0.048653282      |             |
| T <sub>10</sub>  | 3.8053 eV      | HOMO-12 -> LUMO+6 | 0.020072065      |             |
|                  |                | HOMO-12 -> LUMO+8 | 0.035170824      |             |
|                  |                | HOMO-10 -> LUMO+5 | 0.130877512      |             |
|                  |                | HOMO-1 -> LUMO+1  | 0.023683585      |             |
|                  |                | HOMO-1 -> LUMO+2  | 0.145616458      |             |

|                 |                 |                  |                   |             |
|-----------------|-----------------|------------------|-------------------|-------------|
|                 |                 |                  | HOMO-1 -> LUMO+5  | 0.02159042  |
|                 |                 |                  | HOMO-1 -> LUMO+7  | 0.03847538  |
|                 |                 |                  | HOMO-1 -> LUMO+8  | 0.041305128 |
|                 |                 |                  | HOMO -> LUMO+2    | 0.032441139 |
|                 |                 |                  | HOMO -> LUMO+7    | 0.020337411 |
|                 |                 |                  | HOMO -> LUMO+8    | 0.169396922 |
|                 | T <sub>11</sub> | 3.8173 eV        | HOMO-13 -> LUMO+8 | 0.083378945 |
|                 |                 |                  | HOMO-12 -> LUMO+8 | 0.041957251 |
|                 |                 |                  | HOMO-10 -> LUMO+5 | 0.074127901 |
|                 |                 |                  | HOMO-9 -> LUMO+6  | 0.027429504 |
|                 |                 |                  | HOMO-8 -> LUMO+7  | 0.022620645 |
|                 |                 |                  | HOMO-1 -> LUMO+2  | 0.037242663 |
|                 |                 |                  | HOMO-1 -> LUMO+7  | 0.077846688 |
|                 |                 |                  | HOMO-1 -> LUMO+8  | 0.055838136 |
|                 |                 |                  | HOMO -> LUMO+2    | 0.134410755 |
|                 |                 |                  | HOMO -> LUMO+5    | 0.026514439 |
|                 |                 |                  | HOMO -> LUMO+6    | 0.126444147 |
|                 |                 |                  | HOMO -> LUMO+7    | 0.05484672  |
|                 | T <sub>12</sub> | 3.8338 eV        | HOMO-11 -> LUMO+3 | 0.02603762  |
|                 |                 |                  | HOMO-11 -> LUMO+4 | 0.071759873 |
|                 |                 |                  | HOMO-9 -> LUMO+6  | 0.026823912 |
|                 |                 |                  | HOMO-2 -> LUMO+3  | 0.114414145 |
|                 |                 |                  | HOMO-1 -> LUMO+1  | 0.021669456 |
|                 |                 |                  | HOMO-1 -> LUMO+2  | 0.21134101  |
|                 |                 |                  | HOMO-1 -> LUMO+7  | 0.035687233 |
|                 |                 |                  | HOMO -> LUMO+1    | 0.037823501 |
|                 |                 |                  | HOMO -> LUMO+2    | 0.042177697 |
|                 |                 |                  | HOMO -> LUMO+8    | 0.041685394 |
|                 | T <sub>13</sub> | 3.8347 eV        | HOMO-14 -> LUMO+3 | 0.025592269 |
|                 |                 |                  | HOMO-14 -> LUMO+9 | 0.0226845   |
|                 |                 |                  | HOMO-11 -> LUMO+3 | 0.043418151 |
|                 |                 |                  | HOMO-11 -> LUMO+4 | 0.122255235 |
|                 |                 |                  | HOMO-7 -> LUMO+4  | 0.02008008  |
|                 |                 |                  | HOMO-2 -> LUMO+3  | 0.192014045 |
|                 |                 |                  | HOMO-1 -> LUMO+2  | 0.135949837 |
|                 |                 |                  | HOMO -> LUMO+1    | 0.021903245 |
| HOMO -> LUMO+2  |                 |                  | 0.031565794       |             |
| HOMO -> LUMO+8  |                 |                  | 0.023561863       |             |
| T <sub>14</sub> | 3.8717 eV       | HOMO-4 -> LUMO   | 0.031340065       |             |
|                 |                 | HOMO-4 -> LUMO+1 | 0.020096115       |             |

|  |                 |           |                   |             |
|--|-----------------|-----------|-------------------|-------------|
|  |                 |           | HOMO-3 -> LUMO    | 0.834967954 |
|  |                 |           | HOMO-2 -> LUMO    | 0.05916112  |
|  | T <sub>15</sub> | 3.9359 eV | HOMO-6 -> LUMO+1  | 0.028222128 |
|  |                 |           | HOMO-4 -> LUMO+1  | 0.098976903 |
|  |                 |           | HOMO-4 -> LUMO+2  | 0.122690765 |
|  |                 |           | HOMO-3 -> LUMO    | 0.067190448 |
|  |                 |           | HOMO-3 -> LUMO+1  | 0.320144016 |
|  |                 |           | HOMO-3 -> LUMO+2  | 0.062806768 |
|  |                 |           | HOMO-2 -> LUMO+1  | 0.052689072 |
|  | T <sub>16</sub> | 4.0279 eV | HOMO-15 -> LUMO+2 | 0.026243405 |
|  |                 |           | HOMO-6 -> LUMO+1  | 0.052786503 |
|  |                 |           | HOMO-4 -> LUMO+1  | 0.22704365  |
|  |                 |           | HOMO-4 -> LUMO+2  | 0.044712461 |
|  |                 |           | HOMO-3 -> LUMO+2  | 0.174262465 |
|  |                 |           | HOMO-2 -> LUMO+1  | 0.08522669  |
|  |                 |           | HOMO -> LUMO+10   | 0.036137473 |
|  |                 |           | HOMO -> LUMO+13   | 0.027088609 |
|  | T <sub>17</sub> | 4.0418 eV | HOMO-7 -> LUMO    | 0.035139005 |
|  |                 |           | HOMO-5 -> LUMO    | 0.033846816 |
|  |                 |           | HOMO-4 -> LUMO    | 0.028824005 |
|  |                 |           | HOMO-4 -> LUMO+1  | 0.055464482 |
|  |                 |           | HOMO-3 -> LUMO+1  | 0.045614081 |
|  |                 |           | HOMO-2 -> LUMO+1  | 0.394662817 |
|  |                 |           | HOMO-2 -> LUMO+9  | 0.124460583 |
|  |                 |           | HOMO-2 -> LUMO+12 | 0.03864756  |
|  | T <sub>18</sub> | 4.0580 eV | HOMO-6 -> LUMO+1  | 0.020495026 |
|  |                 |           | HOMO-4 -> LUMO    | 0.694501837 |
|  |                 |           | HOMO-2 -> LUMO+1  | 0.06617522  |
|  |                 |           | HOMO-1 -> LUMO+10 | 0.022966531 |
|  |                 |           | HOMO -> LUMO+10   | 0.024296897 |
|  | T <sub>19</sub> | 4.0750 eV | HOMO-17 -> LUMO   | 0.050365032 |
|  |                 |           | HOMO-14 -> LUMO   | 0.026065011 |
|  |                 |           | HOMO-11 -> LUMO+4 | 0.022505933 |
|  |                 |           | HOMO-8 -> LUMO    | 0.028293447 |
|  |                 |           | HOMO-7 -> LUMO    | 0.08686112  |
|  |                 |           | HOMO-5 -> LUMO+12 | 0.045264387 |
|  |                 |           | HOMO-2 -> LUMO+1  | 0.133861728 |
|  |                 |           | HOMO-2 -> LUMO+9  | 0.046500301 |
|  |                 |           | HOMO-2 -> LUMO+12 | 0.133158962 |
|  |                 |           | HOMO-1 -> LUMO+10 | 0.029432232 |

|                  |                 |            |                   |             |
|------------------|-----------------|------------|-------------------|-------------|
|                  | T <sub>20</sub> | 4.0876 eV  | HOMO-15 -> LUMO+1 | 0.02977288  |
|                  |                 |            | HOMO-6 -> LUMO+2  | 0.07881244  |
|                  |                 |            | HOMO-4 -> LUMO    | 0.165577106 |
|                  |                 |            | HOMO-4 -> LUMO+1  | 0.038887027 |
|                  |                 |            | HOMO-3 -> LUMO+13 | 0.025610371 |
|                  |                 |            | HOMO-2 -> LUMO+1  | 0.045952993 |
|                  |                 |            | HOMO-1 -> LUMO+10 | 0.068842762 |
|                  |                 |            | HOMO-1 -> LUMO+13 | 0.035229197 |
|                  |                 |            | HOMO -> LUMO+10   | 0.02981682  |
|                  |                 |            | HOMO -> LUMO+11   | 0.040509965 |
|                  |                 |            | HOMO -> LUMO+14   | 0.074389959 |
|                  | T <sub>21</sub> | 4.1137 eV  | HOMO-17 -> LUMO   | 0.020499075 |
|                  |                 |            | HOMO-16 -> LUMO+1 | 0.02690736  |
|                  |                 |            | HOMO-9 -> LUMO+6  | 0.022936536 |
|                  |                 |            | HOMO-4 -> LUMO    | 0.035064816 |
|                  |                 |            | HOMO-4 -> LUMO+2  | 0.126253125 |
|                  |                 |            | HOMO-2 -> LUMO+1  | 0.030100765 |
|                  |                 |            | HOMO-2 -> LUMO+3  | 0.022155125 |
|                  |                 |            | HOMO-2 -> LUMO+9  | 0.036352865 |
|                  |                 |            | HOMO-1 -> LUMO+10 | 0.022336525 |
|                  |                 |            | HOMO-1 -> LUMO+11 | 0.054568865 |
|                  |                 |            | HOMO -> LUMO+10   | 0.050695648 |
|                  | HOMO -> LUMO+11 | 0.07242818 |                   |             |
|                  | T <sub>22</sub> | 4.1173 eV  | HOMO-17 -> LUMO   | 0.048778138 |
|                  |                 |            | HOMO-14 -> LUMO+3 | 0.038270378 |
|                  |                 |            | HOMO-11 -> LUMO+4 | 0.05184844  |
|                  |                 |            | HOMO-5 -> LUMO    | 0.023181351 |
|                  |                 |            | HOMO-4 -> LUMO+2  | 0.077499845 |
|                  |                 |            | HOMO-2 -> LUMO+1  | 0.099591845 |
|                  |                 |            | HOMO-2 -> LUMO+3  | 0.071706845 |
|                  |                 |            | HOMO-2 -> LUMO+9  | 0.142524605 |
|                  |                 |            | HOMO-1 -> LUMO+11 | 0.032890995 |
|                  |                 |            | HOMO -> LUMO+11   | 0.06741792  |
|                  | T <sub>23</sub> | 4.1240 eV  | HOMO-13 -> LUMO+7 | 0.024129651 |
|                  |                 |            | HOMO-9 -> LUMO+6  | 0.027928298 |
|                  |                 |            | HOMO-8 -> LUMO+6  | 0.022071005 |
|                  |                 |            | HOMO-6 -> LUMO+1  | 0.02438957  |
|                  |                 |            | HOMO-6 -> LUMO+10 | 0.023897352 |
|                  |                 |            | HOMO-4 -> LUMO+2  | 0.036834408 |
| HOMO-3 -> LUMO+1 |                 |            | 0.049757506       |             |



|                 |                  |                  |                   |             |                   |             |
|-----------------|------------------|------------------|-------------------|-------------|-------------------|-------------|
|                 |                  |                  | HOMO-3 -> LUMO+2  | 0.031948864 |                   |             |
|                 |                  |                  | HOMO-1 -> LUMO+10 | 0.0840582   |                   |             |
|                 |                  |                  | HOMO -> LUMO+11   | 0.091746145 |                   |             |
|                 | T <sub>24</sub>  | 4.1611 eV        | HOMO-10 -> LUMO+5 | 0.052994657 |                   |             |
|                 |                  |                  | HOMO-6 -> LUMO+1  | 0.032217373 |                   |             |
|                 |                  |                  | HOMO-6 -> LUMO+11 | 0.026902721 |                   |             |
|                 |                  |                  | HOMO-4 -> LUMO+1  | 0.029069427 |                   |             |
|                 |                  |                  | HOMO-4 -> LUMO+2  | 0.231662631 |                   |             |
|                 |                  |                  | HOMO-3 -> LUMO+1  | 0.033302643 |                   |             |
|                 |                  |                  | HOMO-3 -> LUMO+2  | 0.079816106 |                   |             |
|                 |                  |                  | HOMO-1 -> LUMO+11 | 0.020592322 |                   |             |
|                 |                  |                  | HOMO-1 -> LUMO+14 | 0.02024072  |                   |             |
|                 |                  |                  | HOMO -> LUMO+5    | 0.056052216 |                   |             |
|                 |                  |                  | HOMO -> LUMO+11   | 0.028809601 |                   |             |
|                 |                  |                  | HOMO -> LUMO+13   | 0.045156135 |                   |             |
|                 |                  |                  | T <sub>25</sub>   | 4.2307 eV   | HOMO-10 -> LUMO+5 | 0.032126055 |
|                 |                  |                  |                   |             | HOMO-1 -> LUMO+5  | 0.163901026 |
|                 | HOMO-1 -> LUMO+6 | 0.050403125      |                   |             |                   |             |
|                 | HOMO -> LUMO+5   | 0.396601992      |                   |             |                   |             |
|                 | HOMO -> LUMO+6   | 0.156195783      |                   |             |                   |             |
| HOMO -> LUMO+7  | 0.042649522      |                  |                   |             |                   |             |
| T <sub>26</sub> | 4.2449 eV        | HOMO-3 -> LUMO+2 | 0.087855936       |             |                   |             |
|                 |                  | HOMO-2 -> LUMO+2 | 0.866559795       |             |                   |             |
|                 |                  | HOMO-1 -> LUMO+2 | 0.022408445       |             |                   |             |

**Table S3e** The singlet and triplet excited state transition configurations of the 3CN from single crystal revealed by TD-DFT calculations. The matched excited states that contain the same orbital transition components of S<sub>1</sub> and |S<sub>1</sub>-T<sub>n</sub>| < 0.3 eV were highlighted in red. (for the upper interacted pair in Figure 5)

|                | n              | Energy    | Orbitals         | Transition  |
|----------------|----------------|-----------|------------------|-------------|
| S <sub>n</sub> | S <sub>1</sub> | 3.9085 eV | HOMO-2 -> LUMO+1 | 0.0534449   |
|                |                |           | HOMO-1 -> LUMO   | 0.0784476   |
|                |                |           | HOMO -> LUMO     | 0.6266625   |
|                |                |           | HOMO -> LUMO+1   | 0.144002    |
| T <sub>n</sub> | T <sub>1</sub> | 3.2314 eV | HOMO-5 -> LUMO   | 0.02686562  |
|                |                |           | HOMO-5 -> LUMO+1 | 0.036132096 |
|                |                |           | HOMO-4 -> LUMO   | 0.09122429  |
|                |                |           | HOMO-4 -> LUMO+1 | 0.065225496 |
|                |                |           | HOMO-4 -> LUMO+3 | 0.028771207 |

|                  |                  |                |                  |             |
|------------------|------------------|----------------|------------------|-------------|
|                  |                  |                | HOMO-3 -> LUMO   | 0.021197405 |
|                  |                  |                | HOMO-3 -> LUMO+2 | 0.125690952 |
|                  |                  |                | HOMO-1 -> LUMO+5 | 0.060795845 |
|                  |                  |                | HOMO -> LUMO     | 0.052962106 |
|                  |                  |                | HOMO -> LUMO+1   | 0.076073402 |
|                  |                  |                | HOMO -> LUMO+3   | 0.061523304 |
|                  | T <sub>2</sub>   | 3.2514 eV      | HOMO-7 -> LUMO+2 | 0.030563809 |
|                  |                  |                | HOMO-5 -> LUMO+2 | 0.022675981 |
|                  |                  |                | HOMO-4 -> LUMO   | 0.022774048 |
|                  |                  |                | HOMO-4 -> LUMO+2 | 0.059229936 |
|                  |                  |                | HOMO-3 -> LUMO   | 0.038414376 |
|                  |                  |                | HOMO-3 -> LUMO+1 | 0.082946645 |
|                  |                  |                | HOMO-3 -> LUMO+2 | 0.181864805 |
|                  |                  |                | HOMO-1 -> LUMO+3 | 0.08176968  |
|                  |                  |                | HOMO-1 -> LUMO+4 | 0.022493205 |
|                  |                  |                | HOMO-1 -> LUMO+5 | 0.045989379 |
|                  |                  |                | HOMO-1 -> LUMO+9 | 0.033122232 |
|                  |                  |                | HOMO -> LUMO+2   | 0.063553255 |
|                  |                  |                | HOMO -> LUMO+5   | 0.034463626 |
|                  |                  |                | T <sub>3</sub>   | 3.2651 eV   |
|                  | HOMO-5 -> LUMO+1 | 0.122472903    |                  |             |
|                  | HOMO-5 -> LUMO+4 | 0.02856528     |                  |             |
|                  | HOMO-4 -> LUMO   | 0.067285793    |                  |             |
|                  | HOMO-4 -> LUMO+1 | 0.074482561    |                  |             |
|                  | HOMO-2 -> LUMO   | 0.038875873    |                  |             |
|                  | HOMO-2 -> LUMO+1 | 0.030662785    |                  |             |
|                  | HOMO-2 -> LUMO+3 | 0.042305587    |                  |             |
|                  | HOMO-2 -> LUMO+4 | 0.092975344    |                  |             |
|                  | HOMO-2 -> LUMO+8 | 0.029548805    |                  |             |
|                  | HOMO -> LUMO+4   | 0.02827442     |                  |             |
|                  | T <sub>4</sub>   | 3.3448 eV      | HOMO-4 -> LUMO   | 0.026367265 |
|                  |                  |                | HOMO-2 -> LUMO+1 | 0.124340871 |
|                  |                  |                | HOMO-2 -> LUMO+2 | 0.02401117  |
| HOMO-1 -> LUMO   |                  |                | 0.135241603      |             |
| HOMO-1 -> LUMO+1 |                  |                | 0.04274888       |             |
| HOMO -> LUMO     |                  |                | 0.325156608      |             |
| HOMO -> LUMO+1   |                  |                | 0.097726205      |             |
| HOMO -> LUMO+2   |                  |                | 0.050333299      |             |
| T <sub>5</sub>   | 3.3770 eV        | HOMO-5 -> LUMO | 0.038953987      |             |
|                  |                  | HOMO-2 -> LUMO | 0.37134962       |             |

|                    |                |           |                    |             |
|--------------------|----------------|-----------|--------------------|-------------|
|                    |                |           | HOMO-2 -> LUMO+1   | 0.142994824 |
|                    |                |           | HOMO-1 -> LUMO+1   | 0.07434368  |
|                    |                |           | HOMO -> LUMO       | 0.03538332  |
|                    |                |           | HOMO -> LUMO+1     | 0.149462314 |
|                    | T <sub>6</sub> | 3.3962 eV | HOMO-1 -> LUMO     | 0.024279265 |
|                    |                |           | HOMO-1 -> LUMO+1   | 0.096553757 |
|                    |                |           | HOMO-1 -> LUMO+2   | 0.532140545 |
|                    |                |           | HOMO -> LUMO+1     | 0.03256352  |
|                    |                |           | HOMO -> LUMO+2     | 0.151184007 |
|                    | T <sub>7</sub> | 3.6386 eV | HOMO-10 -> LUMO+10 | 0.02290228  |
|                    |                |           | HOMO-9 -> LUMO+10  | 0.038614205 |
|                    |                |           | HOMO-8 -> LUMO+11  | 0.039920077 |
|                    |                |           | HOMO-5 -> LUMO     | 0.028973059 |
|                    |                |           | HOMO-4 -> LUMO+1   | 0.032696359 |
|                    |                |           | HOMO-2 -> LUMO+3   | 0.0718205   |
|                    |                |           | HOMO-1 -> LUMO+3   | 0.070936378 |
|                    |                |           | HOMO-1 -> LUMO+4   | 0.04122469  |
|                    |                |           | HOMO -> LUMO+2     | 0.040299605 |
|                    |                |           | HOMO -> LUMO+3     | 0.079488819 |
|                    |                |           | HOMO -> LUMO+4     | 0.047604637 |
|                    |                |           | HOMO -> LUMO+5     | 0.098319517 |
|                    | T <sub>8</sub> | 3.6521 eV | HOMO-13 -> LUMO+6  | 0.071881153 |
|                    |                |           | HOMO-12 -> LUMO+6  | 0.021250973 |
|                    |                |           | HOMO-11 -> LUMO+5  | 0.029344954 |
|                    |                |           | HOMO-11 -> LUMO+9  | 0.079904029 |
|                    |                |           | HOMO-3 -> LUMO+2   | 0.071162554 |
|                    |                |           | HOMO-1 -> LUMO+3   | 0.061362051 |
|                    |                |           | HOMO-1 -> LUMO+5   | 0.224932659 |
|                    |                |           | HOMO -> LUMO+2     | 0.023535821 |
|                    |                |           | HOMO -> LUMO+3     | 0.041639208 |
|                    |                |           | HOMO -> LUMO+4     | 0.047228938 |
|                    | T <sub>9</sub> | 3.6580 eV | HOMO -> LUMO+5     | 0.037177191 |
|                    |                |           | HOMO-14 -> LUMO+7  | 0.022455043 |
| HOMO-14 -> LUMO+11 |                |           | 0.024354245        |             |
| HOMO-12 -> LUMO+7  |                |           | 0.028498394        |             |
| HOMO-12 -> LUMO+8  |                |           | 0.048186497        |             |
| HOMO-10 -> LUMO+7  |                |           | 0.03301936         |             |
| HOMO-9 -> LUMO+7   |                |           | 0.036747605        |             |
| HOMO-5 -> LUMO+1   |                |           | 0.040401874        |             |
| HOMO-4 -> LUMO     | 0.03661218     |           |                    |             |

|                   |                 |           |                    |             |
|-------------------|-----------------|-----------|--------------------|-------------|
|                   |                 |           | HOMO-2 -> LUMO+4   | 0.194475898 |
|                   |                 |           | HOMO-2 -> LUMO+8   | 0.023427466 |
|                   |                 |           | HOMO-1 -> LUMO+4   | 0.02876641  |
|                   |                 |           | HOMO -> LUMO+3     | 0.076143629 |
|                   |                 |           | HOMO -> LUMO+4     | 0.024477994 |
|                   | T <sub>10</sub> | 3.7399 eV | HOMO-14 -> LUMO+11 | 0.026583568 |
|                   |                 |           | HOMO-10 -> LUMO+10 | 0.026791495 |
|                   |                 |           | HOMO-9 -> LUMO+10  | 0.07886009  |
|                   |                 |           | HOMO-8 -> LUMO+11  | 0.052526887 |
|                   |                 |           | HOMO-6 -> LUMO+10  | 0.039553594 |
|                   |                 |           | HOMO-4 -> LUMO     | 0.031130115 |
|                   |                 |           | HOMO-1 -> LUMO+1   | 0.03053909  |
|                   |                 |           | HOMO-1 -> LUMO+3   | 0.03125     |
|                   |                 |           | HOMO -> LUMO+3     | 0.028689706 |
|                   |                 |           | HOMO -> LUMO+10    | 0.028886465 |
|                   |                 |           | HOMO -> LUMO+11    | 0.073076645 |
|                   | T <sub>11</sub> | 3.7647 eV | HOMO-13 -> LUMO+6  | 0.083378945 |
|                   |                 |           | HOMO-11 -> LUMO+5  | 0.041957251 |
|                   |                 |           | HOMO-11 -> LUMO+9  | 0.074127901 |
|                   |                 |           | HOMO-7 -> LUMO+6   | 0.020466691 |
|                   |                 |           | HOMO-3 -> LUMO+2   | 0.092863261 |
|                   |                 |           | HOMO-1 -> LUMO+5   | 0.049467706 |
|                   |                 |           | HOMO-1 -> LUMO+9   | 0.156341136 |
|                   |                 |           | HOMO -> LUMO+2     | 0.022361895 |
|                   |                 |           | HOMO -> LUMO+3     | 0.034948392 |
|                   |                 |           | HOMO -> LUMO+9     | 0.046305331 |
|                   | T <sub>12</sub> | 3.7746 eV | HOMO-14 -> LUMO+7  | 0.021652805 |
|                   |                 |           | HOMO-14 -> LUMO+8  | 0.026206762 |
|                   |                 |           | HOMO-12 -> LUMO+4  | 0.033111938 |
|                   |                 |           | HOMO-12 -> LUMO+7  | 0.022024807 |
|                   |                 |           | HOMO-9 -> LUMO+7   | 0.027233112 |
|                   |                 |           | HOMO-5 -> LUMO     | 0.09895021  |
|                   |                 |           | HOMO-5 -> LUMO+1   | 0.053451421 |
|                   |                 |           | HOMO-4 -> LUMO     | 0.025646595 |
|                   |                 |           | HOMO-4 -> LUMO+1   | 0.045638247 |
|                   |                 |           | HOMO-2 -> LUMO+3   | 0.052475041 |
| HOMO-2 -> LUMO+4  |                 |           | 0.087554386        |             |
| HOMO-2 -> LUMO+8  |                 |           | 0.08862892         |             |
| HOMO-2 -> LUMO+11 |                 |           | 0.024129651        |             |
| HOMO -> LUMO+4    |                 |           | 0.029782642        |             |

|  |                  |             |                  |             |
|--|------------------|-------------|------------------|-------------|
|  |                  |             | HOMO -> LUMO+8   | 0.047876557 |
|  | T <sub>13</sub>  | 4.0154 eV   | HOMO-5 -> LUMO+3 | 0.04003884  |
|  |                  |             | HOMO-4 -> LUMO+3 | 0.09996709  |
|  |                  |             | HOMO-3 -> LUMO+5 | 0.125921693 |
|  |                  |             | HOMO-3 -> LUMO+9 | 0.022603632 |
|  |                  |             | HOMO-1 -> LUMO   | 0.074389959 |
|  |                  |             | HOMO-1 -> LUMO+1 | 0.037642192 |
|  |                  |             | HOMO-1 -> LUMO+3 | 0.034050061 |
|  |                  |             | HOMO-1 -> LUMO+5 | 0.061712871 |
|  |                  |             | HOMO -> LUMO     | 0.027028125 |
|  |                  |             | HOMO -> LUMO+1   | 0.064706434 |
|  |                  |             | HOMO -> LUMO+3   | 0.138306442 |
|  |                  |             | HOMO -> LUMO+4   | 0.024142834 |
|  |                  |             | T <sub>14</sub>  | 4.0377 eV   |
|  | HOMO-4 -> LUMO+1 | 0.031385146 |                  |             |
|  | HOMO-4 -> LUMO+3 | 0.023613991 |                  |             |
|  | HOMO-1 -> LUMO   | 0.253244211 |                  |             |
|  | HOMO-1 -> LUMO+1 | 0.12393229  |                  |             |
|  | HOMO-1 -> LUMO+2 | 0.079648387 |                  |             |
|  | HOMO-1 -> LUMO+3 | 0.023535821 |                  |             |
|  | HOMO -> LUMO     | 0.07872512  |                  |             |
|  | T <sub>15</sub>  | 4.0645 eV   | HOMO -> LUMO+2   | 0.022087816 |
|  |                  |             | HOMO-5 -> LUMO+5 | 0.024116472 |
|  |                  |             | HOMO-4 -> LUMO+3 | 0.021337648 |
|  |                  |             | HOMO-4 -> LUMO+5 | 0.064756807 |
|  |                  |             | HOMO-3 -> LUMO+3 | 0.178431432 |
|  |                  |             | HOMO-3 -> LUMO+4 | 0.053719864 |
|  |                  |             | HOMO-3 -> LUMO+5 | 0.090874371 |
|  |                  |             | HOMO-3 -> LUMO+9 | 0.05766408  |
|  |                  |             | HOMO-2 -> LUMO+5 | 0.032742405 |
|  |                  |             | HOMO-1 -> LUMO+3 | 0.023315042 |
|  |                  |             | HOMO -> LUMO+5   | 0.196526882 |
|  | HOMO -> LUMO+9   | 0.04529448  |                  |             |
|  | T <sub>16</sub>  | 4.1150 eV   | HOMO-5 -> LUMO+3 | 0.025249539 |
|  |                  |             | HOMO-5 -> LUMO+4 | 0.051174403 |
|  |                  |             | HOMO-4 -> LUMO+4 | 0.028393445 |
|  |                  |             | HOMO-2 -> LUMO   | 0.065413445 |
|  |                  |             | HOMO-2 -> LUMO+1 | 0.091412328 |
|  |                  |             | HOMO-1 -> LUMO+1 | 0.0335405   |
|  |                  |             | HOMO-1 -> LUMO+2 | 0.074498    |

|  |                  |             |                   |             |                  |             |
|--|------------------|-------------|-------------------|-------------|------------------|-------------|
|  |                  |             | HOMO -> LUMO      | 0.04831697  |                  |             |
|  |                  |             | HOMO -> LUMO+1    | 0.205748295 |                  |             |
|  |                  |             | HOMO -> LUMO+2    | 0.072923805 |                  |             |
|  | T <sub>17</sub>  | 4.1195 eV   | HOMO-5 -> LUMO+3  | 0.059740418 |                  |             |
|  |                  |             | HOMO-5 -> LUMO+4  | 0.159104405 |                  |             |
|  |                  |             | HOMO-5 -> LUMO+8  | 0.033282    |                  |             |
|  |                  |             | HOMO-4 -> LUMO+4  | 0.071245575 |                  |             |
|  |                  |             | HOMO-3 -> LUMO+2  | 0.024191201 |                  |             |
|  |                  |             | HOMO-2 -> LUMO+2  | 0.05285801  |                  |             |
|  |                  |             | HOMO-2 -> LUMO+8  | 0.030395917 |                  |             |
|  |                  |             | HOMO-2 -> LUMO+12 | 0.024579879 |                  |             |
|  |                  |             | HOMO-1 -> LUMO+1  | 0.02271433  |                  |             |
|  |                  |             | HOMO-1 -> LUMO+2  | 0.054906352 |                  |             |
|  |                  |             | HOMO -> LUMO+1    | 0.042824938 |                  |             |
|  |                  |             | HOMO -> LUMO+2    | 0.104662275 |                  |             |
|  |                  |             | T <sub>18</sub>   | 4.1264 eV   | HOMO-5 -> LUMO+4 | 0.040254194 |
|  |                  |             |                   |             | HOMO-3 -> LUMO+2 | 0.022319619 |
|  | HOMO-2 -> LUMO   | 0.124031882 |                   |             |                  |             |
|  | HOMO-2 -> LUMO+2 | 0.020495026 |                   |             |                  |             |
|  | HOMO-1 -> LUMO   | 0.03484272  |                   |             |                  |             |
|  | HOMO-1 -> LUMO+2 | 0.070050245 |                   |             |                  |             |
|  | HOMO -> LUMO     | 0.164795405 |                   |             |                  |             |
|  | HOMO -> LUMO+1   | 0.107379048 |                   |             |                  |             |
|  | HOMO -> LUMO+2   | 0.198903859 |                   |             |                  |             |
|  | T <sub>19</sub>  | 4.1861 eV   | HOMO-5 -> LUMO+4  | 0.027378    |                  |             |
|  |                  |             | HOMO-2 -> LUMO    | 0.23875432  |                  |             |
|  |                  |             | HOMO-2 -> LUMO+1  | 0.304106407 |                  |             |
|  |                  |             | HOMO-2 -> LUMO+2  | 0.046952737 |                  |             |
|  |                  |             | HOMO-2 -> LUMO+7  | 0.030910925 |                  |             |
|  |                  |             | HOMO-1 -> LUMO    | 0.040418931 |                  |             |
|  |                  |             | HOMO-1 -> LUMO+1  | 0.023078113 |                  |             |
|  |                  |             | HOMO -> LUMO      | 0.043559713 |                  |             |
|  |                  |             | HOMO -> LUMO+1    | 0.026101555 |                  |             |
|  |                  |             | HOMO -> LUMO+7    | 0.032589045 |                  |             |
|  | T <sub>20</sub>  | 4.2249 eV   | HOMO-6 -> LUMO+10 | 0.024059405 |                  |             |
|  |                  |             | HOMO-3 -> LUMO    | 0.022277383 |                  |             |
|  |                  |             | HOMO-3 -> LUMO+1  | 0.027223778 |                  |             |
|  |                  |             | HOMO-2 -> LUMO+12 | 0.032430951 |                  |             |
|  |                  |             | HOMO-1 -> LUMO+3  | 0.022842394 |                  |             |
|  |                  |             | HOMO -> LUMO      | 0.050995405 |                  |             |

|                   |                 |           |                   |             |
|-------------------|-----------------|-----------|-------------------|-------------|
|                   |                 |           | HOMO -> LUMO+2    | 0.025750882 |
|                   |                 |           | HOMO -> LUMO+4    | 0.040470125 |
|                   |                 |           | HOMO -> LUMO+5    | 0.039121639 |
|                   |                 |           | HOMO -> LUMO+7    | 0.062636762 |
|                   |                 |           | HOMO -> LUMO+8    | 0.025814464 |
|                   |                 |           | HOMO -> LUMO+11   | 0.03563916  |
|                   |                 |           | HOMO -> LUMO+12   | 0.041287885 |
|                   |                 |           | HOMO -> LUMO+14   | 0.0647928   |
|                   | T <sub>21</sub> | 4.2534 eV | HOMO-13 -> LUMO+6 | 0.051315265 |
|                   |                 |           | HOMO-7 -> LUMO+6  | 0.020535538 |
|                   |                 |           | HOMO-3 -> LUMO+2  | 0.074004739 |
|                   |                 |           | HOMO-3 -> LUMO+5  | 0.020208541 |
|                   |                 |           | HOMO-1 -> LUMO+5  | 0.021123346 |
|                   |                 |           | HOMO-1 -> LUMO+9  | 0.133086723 |
|                   |                 |           | HOMO-1 -> LUMO+13 | 0.103021683 |
|                   |                 |           | HOMO -> LUMO+2    | 0.052650125 |
|                   |                 |           | HOMO -> LUMO+4    | 0.02635808  |
|                   |                 |           | HOMO -> LUMO+5    | 0.027107233 |
|                   |                 |           | HOMO -> LUMO+9    | 0.040112449 |
|                   |                 |           | HOMO -> LUMO+13   | 0.047315032 |
|                   | T <sub>22</sub> | 4.2592 eV | HOMO-12 -> LUMO+7 | 0.020438376 |
|                   |                 |           | HOMO-5 -> LUMO+1  | 0.0220542   |
|                   |                 |           | HOMO-5 -> LUMO+4  | 0.090951125 |
|                   |                 |           | HOMO-4 -> LUMO+3  | 0.025483789 |
|                   |                 |           | HOMO-4 -> LUMO+4  | 0.035128402 |
|                   |                 |           | HOMO-2 -> LUMO+4  | 0.057684458 |
|                   |                 |           | HOMO-2 -> LUMO+8  | 0.075567169 |
|                   |                 |           | HOMO-2 -> LUMO+12 | 0.040949496 |
|                   |                 |           | HOMO-2 -> LUMO+14 | 0.044515312 |
|                   |                 |           | HOMO -> LUMO      | 0.039155213 |
|                   |                 |           | HOMO -> LUMO+8    | 0.031135106 |
|                   |                 |           | HOMO -> LUMO+12   | 0.047179776 |
|                   | T <sub>23</sub> | 4.2777    | HOMO-11 -> LUMO+6 | 0.03942432  |
| HOMO-11 -> LUMO+9 |                 |           | 0.028651392       |             |
| HOMO-1 -> LUMO    |                 |           | 0.092209357       |             |
| HOMO-1 -> LUMO+1  |                 |           | 0.104205255       |             |
| HOMO-1 -> LUMO+6  |                 |           | 0.365238951       |             |
| HOMO-1 -> LUMO+7  |                 |           | 0.026348897       |             |
| HOMO -> LUMO+1    |                 |           | 0.026625089       |             |
| HOMO -> LUMO+6    |                 |           | 0.161414256       |             |

|  |                 |           |                   |             |
|--|-----------------|-----------|-------------------|-------------|
|  | T <sub>24</sub> | 4.2832 eV | HOMO-1 -> LUMO    | 0.226895425 |
|  |                 |           | HOMO-1 -> LUMO+1  | 0.322195754 |
|  |                 |           | HOMO-1 -> LUMO+2  | 0.023622685 |
|  |                 |           | HOMO-1 -> LUMO+6  | 0.124880029 |
|  |                 |           | HOMO -> LUMO      | 0.033846816 |
|  |                 |           | HOMO -> LUMO+1    | 0.069407928 |
|  |                 |           | HOMO -> LUMO+6    | 0.048180288 |
|  | T <sub>25</sub> | 4.3432 eV | HOMO-12 -> LUMO+7 | 0.032865352 |
|  |                 |           | HOMO-2 -> LUMO    | 0.031741921 |
|  |                 |           | HOMO-2 -> LUMO+1  | 0.060246147 |
|  |                 |           | HOMO-2 -> LUMO+7  | 0.245112013 |
|  |                 |           | HOMO-1 -> LUMO+7  | 0.061012231 |
|  |                 |           | HOMO-1 -> LUMO+11 | 0.020592322 |
|  |                 |           | HOMO -> LUMO+7    | 0.153004056 |
|  |                 |           | HOMO -> LUMO+8    | 0.020490977 |
|  |                 |           | HOMO -> LUMO+10   | 0.023449117 |
|  |                 |           | HOMO -> LUMO+11   | 0.061755037 |
|  | T <sub>26</sub> | 4.3589 eV | HOMO-3 -> LUMO    | 0.05707469  |
|  |                 |           | HOMO-3 -> LUMO+1  | 0.02594642  |
|  |                 |           | HOMO-2 -> LUMO    | 0.045138106 |
|  |                 |           | HOMO-2 -> LUMO+7  | 0.048959463 |
|  |                 |           | HOMO-2 -> LUMO+8  | 0.020856989 |
|  |                 |           | HOMO-2 -> LUMO+10 | 0.027321869 |
|  |                 |           | HOMO-1 -> LUMO+10 | 0.061586461 |
|  |                 |           | HOMO -> LUMO+10   | 0.265997592 |
|  |                 |           | HOMO -> LUMO+11   | 0.038547538 |

**Table S4a** The singlet and triplet excited state transition configurations of the PCN from single crystal revealed by TD-DFT calculations. The matched excited states that contain the same orbital transition components of S<sub>1</sub> and |S<sub>1</sub>-T<sub>n</sub>| < 0.3 eV were highlighted in red. (for the bottom interacted pair in Figure 5)

|                | n              | Energy    | Orbitals        | Transition  |
|----------------|----------------|-----------|-----------------|-------------|
| S <sub>n</sub> | S <sub>1</sub> | 3.4639 eV | HOMO-1 ->LUMO   | 0.596429    |
|                |                |           | HOMO ->LUMO+1   | 0.395196    |
| T <sub>n</sub> | T <sub>1</sub> | 3.0335 eV | HOMO-7 ->LUMO   | 0.029272321 |
|                |                |           | HOMO-6 ->LUMO+1 | 0.031440289 |
|                |                |           | HOMO-1 ->LUMO+1 | 0.392232245 |
|                |                |           | HOMO ->LUMO     | 0.477420833 |
|                | T <sub>2</sub> | 3.0344 eV | HOMO-7 ->LUMO+1 | 0.028070282 |



|                 |           |  |                 |             |
|-----------------|-----------|--|-----------------|-------------|
|                 |           |  | HOMO-6 ->LUMO   | 0.032538005 |
|                 |           |  | HOMO-1 ->LUMO   | 0.462298817 |
|                 |           |  | HOMO ->LUMO+1   | 0.407198977 |
| T <sub>3</sub>  | 3.3077 eV |  | HOMO-5 ->LUMO+4 | 0.022075207 |
|                 |           |  | HOMO-3 ->LUMO+4 | 0.256270723 |
|                 |           |  | HOMO-3 ->LUMO+5 | 0.046689568 |
|                 |           |  | HOMO-2 ->LUMO+4 | 0.314614849 |
|                 |           |  | HOMO-2 ->LUMO+5 | 0.037625731 |
|                 |           |  | HOMO-1 ->LUMO+6 | 0.022561128 |
|                 |           |  | HOMO-1 ->LUMO+7 | 0.036272018 |
|                 |           |  | HOMO ->LUMO+7   | 0.040623901 |
| T <sub>4</sub>  | 3.3079 eV |  | HOMO-4 ->LUMO+5 | 0.023099602 |
|                 |           |  | HOMO-3 ->LUMO+4 | 0.05379856  |
|                 |           |  | HOMO-3 ->LUMO+5 | 0.296850535 |
|                 |           |  | HOMO-2 ->LUMO+4 | 0.032369857 |
|                 |           |  | HOMO-2 ->LUMO+5 | 0.27242533  |
|                 |           |  | HOMO-1 ->LUMO+6 | 0.036369045 |
|                 |           |  | HOMO-1 ->LUMO+7 | 0.022586626 |
|                 |           |  | HOMO ->LUMO+6   | 0.04066952  |
| T <sub>5</sub>  | 3.5308 eV |  | HOMO-1 ->LUMO+4 | 0.315805834 |
|                 |           |  | HOMO-1 ->LUMO+5 | 0.10448849  |
|                 |           |  | HOMO ->LUMO+4   | 0.408517605 |
| T <sub>6</sub>  | 3.5308 eV |  | HOMO-1 ->LUMO+4 | 0.106380394 |
|                 |           |  | HOMO-1 ->LUMO+5 | 0.315583346 |
|                 |           |  | HOMO ->LUMO+5   | 0.406639656 |
| T <sub>7</sub>  | 3.6220 eV |  | HOMO-1 ->LUMO   | 0.470566407 |
|                 |           |  | HOMO ->LUMO+1   | 0.512436385 |
| T <sub>8</sub>  | 3.6225 eV |  | HOMO-1 ->LUMO+1 | 0.526851125 |
|                 |           |  | HOMO ->LUMO     | 0.454409511 |
| T <sub>9</sub>  | 3.7211 eV |  | HOMO-3 ->LUMO+1 | 0.364948418 |
|                 |           |  | HOMO-3 ->LUMO+4 | 0.024336592 |
|                 |           |  | HOMO-2 ->LUMO   | 0.541590689 |
|                 |           |  | HOMO-2 ->LUMO+5 | 0.023151216 |
| T <sub>10</sub> | 3.7214 eV |  | HOMO-3 ->LUMO   | 0.536295818 |
|                 |           |  | HOMO-3 ->LUMO+5 | 0.02608328  |
|                 |           |  | HOMO-2 ->LUMO+1 | 0.370367818 |
|                 |           |  | HOMO-2 ->LUMO+4 | 0.02441608  |
| T <sub>11</sub> | 3.7766 eV |  | HOMO-1 ->LUMO+3 | 0.360349562 |
|                 |           |  | HOMO ->LUMO+2   | 0.560867587 |
| T <sub>12</sub> | 3.7789 eV |  | HOMO-1 ->LUMO+2 | 0.542381955 |

|  |                 |           |                  |             |
|--|-----------------|-----------|------------------|-------------|
|  |                 |           | HOMO ->LUMO+3    | 0.378380403 |
|  | T <sub>13</sub> | 3.9729 eV | HOMO-11 ->LUMO+3 | 0.026019367 |
|  |                 |           | HOMO-10 ->LUMO+2 | 0.028627459 |
|  |                 |           | HOMO-8 ->LUMO    | 0.023596609 |
|  |                 |           | HOMO-7 ->LUMO    | 0.035960256 |
|  |                 |           | HOMO-6 ->LUMO+1  | 0.049228944 |
|  |                 |           | HOMO-3 ->LUMO    | 0.354246279 |
|  |                 |           | HOMO-2 ->LUMO+1  | 0.42502356  |
|  | T <sub>14</sub> | 3.9750 eV | HOMO-6 ->LUMO    | 0.030184245 |
|  |                 |           | HOMO-3 ->LUMO+1  | 0.537933409 |
|  |                 |           | HOMO-2 ->LUMO    | 0.334087728 |
|  | T <sub>15</sub> | 3.9889 eV | HOMO-11 ->LUMO+2 | 0.11098645  |
|  |                 |           | HOMO-10 ->LUMO+3 | 0.10719376  |
|  |                 |           | HOMO-9 ->LUMO    | 0.071759873 |
|  |                 |           | HOMO-8 ->LUMO+1  | 0.068679592 |
|  |                 |           | HOMO-7 ->LUMO+1  | 0.154190151 |
|  |                 |           | HOMO-6 ->LUMO    | 0.18363012  |
|  |                 |           | HOMO-3 ->LUMO+1  | 0.050358685 |
|  |                 |           | HOMO-2 ->LUMO    | 0.078677511 |
|  |                 |           | HOMO-1 ->LUMO    | 0.032727053 |
|  |                 |           | HOMO ->LUMO+1    | 0.044676583 |
|  | T <sub>16</sub> | 3.9896 eV | HOMO-11 ->LUMO+3 | 0.094769165 |
|  |                 |           | HOMO-10 ->LUMO+2 | 0.104561645 |
|  |                 |           | HOMO-9 ->LUMO+1  | 0.063424973 |
|  |                 |           | HOMO-8 ->LUMO    | 0.064304152 |
|  |                 |           | HOMO-7 ->LUMO    | 0.146470369 |
|  |                 |           | HOMO-6 ->LUMO+1  | 0.154545761 |
|  |                 |           | HOMO-3 ->LUMO    | 0.063988954 |
|  |                 |           | HOMO-2 ->LUMO+1  | 0.1573605   |
|  |                 |           | HOMO-1 ->LUMO+1  | 0.037444898 |
|  |                 |           | HOMO ->LUMO      | 0.029846131 |
|  | T <sub>17</sub> | 4.1518 eV | HOMO-5 ->LUMO+5  | 0.040174786 |
|  |                 |           | HOMO-4 ->LUMO+5  | 0.057895239 |
|  |                 |           | HOMO-3 ->LUMO+5  | 0.098089063 |
|  |                 |           | HOMO-2 ->LUMO+5  | 0.0820125   |
|  |                 |           | HOMO-1 ->LUMO+6  | 0.187272    |
|  |                 |           | HOMO-1 ->LUMO+7  | 0.091463645 |
|  |                 |           | HOMO ->LUMO+6    | 0.177226765 |
|  |                 |           | HOMO ->LUMO+7    | 0.104680577 |
|  | T <sub>18</sub> | 4.1520 eV | HOMO-5 ->LUMO+4  | 0.059747331 |

|  |                 |           |                  |             |
|--|-----------------|-----------|------------------|-------------|
|  |                 |           | HOMO-4 ->LUMO+4  | 0.038591976 |
|  |                 |           | HOMO-3 ->LUMO+4  | 0.085168899 |
|  |                 |           | HOMO-2 ->LUMO+4  | 0.095213752 |
|  |                 |           | HOMO-1 ->LUMO+6  | 0.091301191 |
|  |                 |           | HOMO-1 ->LUMO+7  | 0.187210805 |
|  |                 |           | HOMO ->LUMO+6    | 0.104680577 |
|  |                 |           | HOMO ->LUMO+7    | 0.177441159 |
|  | T <sub>19</sub> | 4.2973 eV | HOMO-1 ->LUMO+2  | 0.415306752 |
|  |                 |           | HOMO ->LUMO+3    | 0.575986445 |
|  | T <sub>20</sub> | 4.2987 eV | HOMO-1 ->LUMO+3  | 0.591045409 |
|  |                 |           | HOMO ->LUMO+2    | 0.394325282 |
|  | T <sub>21</sub> | 4.3855 eV | HOMO-3 ->LUMO+3  | 0.237677546 |
|  |                 |           | HOMO-2 ->LUMO+2  | 0.52005721  |
|  |                 |           | HOMO-1 ->LUMO+9  | 0.033050205 |
|  |                 |           | HOMO ->LUMO+8    | 0.032060184 |
|  | T <sub>22</sub> | 4.3864 eV | HOMO-3 ->LUMO+2  | 0.521935445 |
|  |                 |           | HOMO-2 ->LUMO+3  | 0.2429045   |
|  |                 |           | HOMO-1 ->LUMO+8  | 0.02977288  |
|  |                 |           | HOMO ->LUMO+9    | 0.031330051 |
|  | T <sub>23</sub> | 4.4192 eV | HOMO-11 ->LUMO+3 | 0.026110695 |
|  |                 |           | HOMO-10 ->LUMO+2 | 0.029437085 |
|  |                 |           | HOMO-9 ->LUMO+4  | 0.020689848 |
|  |                 |           | HOMO-5 ->LUMO+7  | 0.066517634 |
|  |                 |           | HOMO-4 ->LUMO+6  | 0.068405607 |
|  |                 |           | HOMO-3 ->LUMO+3  | 0.06019756  |
|  |                 |           | HOMO-3 ->LUMO+12 | 0.040983845 |
|  |                 |           | HOMO-2 ->LUMO+2  | 0.146654448 |
|  |                 |           | HOMO-2 ->LUMO+13 | 0.04158728  |
|  |                 |           | HOMO-1 ->LUMO+9  | 0.143155303 |
|  |                 |           | HOMO ->LUMO+8    | 0.138917205 |
|  | T <sub>24</sub> | 4.4196 eV | HOMO-11 ->LUMO+2 | 0.02807976  |
|  |                 |           | HOMO-10 ->LUMO+3 | 0.027687751 |
|  |                 |           | HOMO-9 ->LUMO+5  | 0.021164474 |
|  |                 |           | HOMO-7 ->LUMO+4  | 0.020244744 |
|  |                 |           | HOMO-5 ->LUMO+6  | 0.06386738  |
|  |                 |           | HOMO-4 ->LUMO+7  | 0.064232448 |
|  |                 |           | HOMO-3 ->LUMO+2  | 0.140736346 |
|  |                 |           | HOMO-3 ->LUMO+13 | 0.042264874 |
|  |                 |           | HOMO-2 ->LUMO+3  | 0.057081447 |
|  |                 |           | HOMO-2 ->LUMO+12 | 0.043241523 |

|  |                 |           |                 |             |
|--|-----------------|-----------|-----------------|-------------|
|  | T <sub>25</sub> | 4.6117 eV | HOMO-1 ->LUMO+8 | 0.139043738 |
|  |                 |           | HOMO ->LUMO+9   | 0.14558408  |
|  |                 |           | HOMO-1 ->LUMO+4 | 0.423089607 |
|  |                 |           | HOMO-1 ->LUMO+5 | 0.080737693 |
|  |                 |           | HOMO ->LUMO+4   | 0.443757363 |
|  |                 |           | HOMO ->LUMO+5   | 0.050155779 |
|  | T <sub>26</sub> | 4.6119 eV | HOMO-1 ->LUMO+4 | 0.080424562 |
|  |                 |           | HOMO-1 ->LUMO+5 | 0.422960834 |
|  |                 |           | HOMO ->LUMO+4   | 0.049940641 |
|  |                 |           | HOMO ->LUMO+5   | 0.44443592  |

**Table S4b** The singlet and triplet excited state transition configurations of the MCN from single crystal revealed by TD-DFT calculations. The matched excited states that contain the same orbital transition components of S<sub>1</sub> and |S<sub>1</sub>-T<sub>n</sub>| < 0.3 eV were highlighted in red. (for the bottom interacted pair in Figure 5)

|                   | n              | Energy    | Orbitals           | Transition  |
|-------------------|----------------|-----------|--------------------|-------------|
|                   | S <sub>1</sub> | 3.4114 eV | HOMO -> LUMO+1     | 0.98470964  |
| T <sub>n</sub>    | T <sub>1</sub> | 3.1322 eV | HOMO-10 -> LUMO+1  | 0.090806173 |
|                   |                |           | HOMO -> LUMO+1     | 0.830683162 |
|                   |                |           | HOMO -> LUMO+4     | 0.02556965  |
|                   | T <sub>2</sub> | 3.1812 eV | HOMO-9 -> LUMO+2   | 0.1088671   |
|                   |                |           | HOMO-1 -> LUMO     | 0.0360085   |
|                   |                |           | HOMO-1 -> LUMO+2   | 0.7674862   |
|                   | T <sub>3</sub> | 3.1951 eV | HOMO-11 -> LUMO    | 0.1065096   |
|                   |                |           | HOMO-2 -> LUMO     | 0.7775294   |
|                   |                |           | HOMO-2 -> LUMO+5   | 0.0254838   |
|                   | T <sub>4</sub> | 3.3626 eV | HOMO-17 -> LUMO+16 | 0.0229537   |
|                   |                |           | HOMO-8 -> LUMO+3   | 0.0361267   |
|                   |                |           | HOMO-5 -> LUMO+3   | 0.5605287   |
|                   |                |           | HOMO-5 -> LUMO+4   | 0.0423172   |
|                   |                |           | HOMO-5 -> LUMO+5   | 0.0254657   |
|                   |                |           | HOMO-2 -> LUMO+3   | 0.1595899   |
|                   |                |           | HOMO-2 -> LUMO+9   | 0.0870363   |
|                   | T <sub>5</sub> | 3.3653 eV | HOMO-15 -> LUMO+18 | 0.0227058   |
|                   |                |           | HOMO-7 -> LUMO+6   | 0.0413626   |
| HOMO-4 -> LUMO+6  |                |           | 0.5744848          |             |
| HOMO-4 -> LUMO+7  |                |           | 0.0716538          |             |
| HOMO-1 -> LUMO+6  |                |           | 0.1435194          |             |
| HOMO-1 -> LUMO+10 |                |           | 0.0875711          |             |

|                   |                 |                   |                   |           |
|-------------------|-----------------|-------------------|-------------------|-----------|
|                   | T <sub>6</sub>  | 3.3668 eV         | HOMO-6 -> LUMO+8  | 0.0376971 |
|                   |                 |                   | HOMO-3 -> LUMO+8  | 0.6604682 |
|                   |                 |                   | HOMO -> LUMO+8    | 0.1324683 |
|                   |                 |                   | HOMO -> LUMO+11   | 0.085988  |
|                   | T <sub>7</sub>  | 3.5133 eV         | HOMO-8 -> LUMO+9  | 0.0288048 |
|                   |                 |                   | HOMO-5 -> LUMO+3  | 0.1429841 |
|                   |                 |                   | HOMO-2 -> LUMO+3  | 0.6861593 |
|                   |                 |                   | HOMO-2 -> LUMO+4  | 0.0559987 |
|                   | T <sub>8</sub>  | 3.5213 eV         | HOMO-7 -> LUMO+10 | 0.0302285 |
|                   |                 |                   | HOMO-4 -> LUMO+6  | 0.1291336 |
|                   |                 |                   | HOMO-1 -> LUMO+6  | 0.7465198 |
|                   | T <sub>9</sub>  | 3.5294 eV         | HOMO-6 -> LUMO+11 | 0.0300615 |
|                   |                 |                   | HOMO-3 -> LUMO+8  | 0.111751  |
|                   |                 |                   | HOMO -> LUMO      | 0.0451081 |
|                   |                 |                   | HOMO -> LUMO+4    | 0.0492729 |
|                   |                 |                   | HOMO -> LUMO+8    | 0.6953507 |
|                   | T <sub>10</sub> | 3.6155 eV         | HOMO-16 -> LUMO+4 | 0.054807  |
|                   |                 |                   | HOMO-13 -> LUMO+1 | 0.0553846 |
|                   |                 |                   | HOMO-13 -> LUMO+4 | 0.037549  |
|                   |                 |                   | HOMO-10 -> LUMO+1 | 0.1131548 |
| HOMO-10 -> LUMO+4 |                 |                   | 0.0204182         |           |
| HOMO -> LUMO      |                 |                   | 0.0419978         |           |
| HOMO -> LUMO+1    |                 |                   | 0.0974611         |           |
| HOMO -> LUMO+3    |                 |                   | 0.0434182         |           |
| HOMO -> LUMO+4    |                 |                   | 0.4606464         |           |
| HOMO -> LUMO+8    |                 |                   | 0.024642          |           |
| T <sub>11</sub>   | 3.6400 eV       | HOMO -> LUMO      | 0.8647703         |           |
|                   |                 | HOMO -> LUMO+8    | 0.0526566         |           |
| T <sub>12</sub>   | 3.6613 eV       | HOMO-15 -> LUMO+7 | 0.0285653         |           |
|                   |                 | HOMO-12 -> LUMO+2 | 0.078511          |           |
|                   |                 | HOMO-12 -> LUMO+7 | 0.0679109         |           |
|                   |                 | HOMO-9 -> LUMO+2  | 0.1322522         |           |
|                   |                 | HOMO-9 -> LUMO+7  | 0.0270793         |           |
|                   |                 | HOMO-1 -> LUMO+2  | 0.1428451         |           |
|                   |                 | HOMO-1 -> LUMO+7  | 0.4303879         |           |
| T <sub>13</sub>   | 3.6736 eV       | HOMO-17 -> LUMO+5 | 0.0237402         |           |
|                   |                 | HOMO-14 -> LUMO   | 0.0823531         |           |
|                   |                 | HOMO-14 -> LUMO+5 | 0.0727788         |           |
|                   |                 | HOMO-11 -> LUMO   | 0.1216527         |           |
|                   |                 | HOMO-11 -> LUMO+5 | 0.029166          |           |

|  |                 |           |                   |           |
|--|-----------------|-----------|-------------------|-----------|
|  |                 |           | HOMO-2 -> LUMO    | 0.106528  |
|  |                 |           | HOMO-2 -> LUMO+2  | 0.0263719 |
|  |                 |           | HOMO-2 -> LUMO+5  | 0.4214905 |
|  |                 |           | HOMO -> LUMO      | 0.0383645 |
|  | T <sub>14</sub> | 3.7202 eV | HOMO -> LUMO+2    | 0.9894306 |
|  | T <sub>15</sub> | 3.7555 eV | HOMO-1 -> LUMO    | 0.9412743 |
|  | T <sub>16</sub> | 3.8283 eV | HOMO-3 -> LUMO+1  | 0.9555978 |
|  | T <sub>17</sub> | 3.8487 eV | HOMO-1 -> LUMO+1  | 0.9952912 |
|  | T <sub>18</sub> | 3.8703 eV | HOMO-2 -> LUMO    | 0.0427664 |
|  |                 |           | HOMO-2 -> LUMO+2  | 0.918907  |
|  | T <sub>19</sub> | 3.8988 eV | HOMO-2 -> LUMO+1  | 0.9859169 |
|  | T <sub>20</sub> | 3.9126 eV | HOMO-4 -> LUMO    | 0.0468915 |
|  |                 |           | HOMO-4 -> LUMO+2  | 0.8905252 |
|  |                 |           | HOMO-1 -> LUMO+7  | 0.0250253 |
|  | T <sub>21</sub> | 3.9415 eV | HOMO-5 -> LUMO    | 0.8872985 |
|  |                 |           | HOMO-5 -> LUMO+2  | 0.0205599 |
|  |                 |           | HOMO-2 -> LUMO+5  | 0.0327066 |
|  | T <sub>22</sub> | 3.9472 eV | HOMO-13 -> LUMO+1 | 0.1403122 |
|  |                 |           | HOMO-11 -> LUMO+1 | 0.0284173 |
|  |                 |           | HOMO-10 -> LUMO+1 | 0.3662824 |
|  |                 |           | HOMO-3 -> LUMO+1  | 0.0245178 |
|  |                 |           | HOMO -> LUMO+1    | 0.0227783 |
|  |                 |           | HOMO -> LUMO+3    | 0.0276736 |
|  |                 |           | HOMO -> LUMO+4    | 0.2744664 |
|  | T <sub>23</sub> | 3.9809 eV | HOMO-3 -> LUMO    | 0.9581432 |
|  | T <sub>24</sub> | 4.0022 eV | HOMO-12 -> LUMO+2 | 0.1213964 |
|  | T <sub>25</sub> | 4.0189 eV | HOMO-9 -> LUMO+2  | 0.3012277 |
|  |                 |           | HOMO-4 -> LUMO+2  | 0.0396549 |
|  |                 |           | HOMO-1 -> LUMO+7  | 0.3846697 |
|  | T <sub>26</sub> | 4.0706 eV | HOMO-3 -> LUMO+2  | 0.9906689 |

**Table S4c** The singlet and triplet excited state transition configurations of the OCN from single crystal revealed by TD-DFT calculations. The matched excited states that contain the same orbital transition components of S<sub>1</sub> and |S<sub>1</sub>-T<sub>n</sub>| < 0.3 eV were highlighted in red. (for the bottom interacted pair in Figure 5)

|                | n              | Energy    | Orbitals        | Transition  |
|----------------|----------------|-----------|-----------------|-------------|
| S <sub>n</sub> | S <sub>1</sub> | 2.7256 eV | HOMO -> LUMO    | 0.99913248  |
| T <sub>n</sub> | T <sub>1</sub> | 2.7255 eV | HOMO-22 -> LUMO | 0.021057624 |
|                |                |           | HOMO-6 -> LUMO  | 0.903275523 |

|                 |           |  |                    |             |
|-----------------|-----------|--|--------------------|-------------|
|                 |           |  | HOMO-6 -> LUMO+3   | 0.021736125 |
| T <sub>2</sub>  | 2.9890 eV |  | HOMO-22 -> LUMO    | 0.021057624 |
|                 |           |  | HOMO-6 -> LUMO     | 0.903275523 |
|                 |           |  | HOMO-6 -> LUMO+3   | 0.021736125 |
| T <sub>3</sub>  | 3.0225 eV |  | HOMO-1 -> LUMO     | 0.972928802 |
|                 |           |  | HOMO-1 -> LUMO+2   | 0.023531482 |
| T <sub>4</sub>  | 3.0574 eV |  | HOMO-16 -> LUMO+1  | 0.020697986 |
|                 |           |  | HOMO-3 -> LUMO     | 0.055617795 |
|                 |           |  | HOMO-3 -> LUMO+1   | 0.810162663 |
|                 |           |  | HOMO-3 -> LUMO+5   | 0.022518664 |
| T <sub>5</sub>  | 3.0797 eV |  | HOMO-2 -> LUMO     | 0.955266064 |
| T <sub>6</sub>  | 3.1152 eV |  | HOMO-3 -> LUMO     | 0.89932825  |
|                 |           |  | HOMO-3 -> LUMO+1   | 0.02700488  |
|                 |           |  | HOMO-2 -> LUMO     | 0.030066424 |
| T <sub>7</sub>  | 3.1295 eV |  | HOMO-15 -> LUMO+2  | 0.039812776 |
|                 |           |  | HOMO-1 -> LUMO     | 0.024962717 |
|                 |           |  | HOMO-1 -> LUMO+2   | 0.81971208  |
|                 |           |  | HOMO-1 -> LUMO+6   | 0.041893546 |
| T <sub>8</sub>  | 3.1302 eV |  | HOMO -> LUMO+1     | 0.967078874 |
| T <sub>9</sub>  | 3.2260 eV |  | HOMO-13 -> LUMO+4  | 0.026325946 |
|                 |           |  | HOMO-7 -> LUMO     | 0.025651125 |
|                 |           |  | HOMO-7 -> LUMO+4   | 0.518263805 |
|                 |           |  | HOMO-7 -> LUMO+5   | 0.060649479 |
|                 |           |  | HOMO-6 -> LUMO+4   | 0.026491416 |
|                 |           |  | HOMO-6 -> LUMO+11  | 0.024134045 |
|                 |           |  | HOMO-6 -> LUMO+12  | 0.054100762 |
|                 |           |  | HOMO-5 -> LUMO+8   | 0.107165981 |
| T <sub>10</sub> | 3.2281 eV |  | HOMO-11 -> LUMO+8  | 0.028910506 |
|                 |           |  | HOMO-7 -> LUMO+4   | 0.099181672 |
|                 |           |  | HOMO-5 -> LUMO+7   | 0.04404512  |
|                 |           |  | HOMO-5 -> LUMO+8   | 0.5607405   |
|                 |           |  | HOMO-3 -> LUMO+13  | 0.078614055 |
| T <sub>11</sub> | 3.2332 eV |  | HOMO-10 -> LUMO+9  | 0.038270378 |
|                 |           |  | HOMO-10 -> LUMO+20 | 0.02259938  |
|                 |           |  | HOMO-4 -> LUMO+9   | 0.729003975 |
|                 |           |  | HOMO-1 -> LUMO+9   | 0.024584314 |
|                 |           |  | HOMO-1 -> LUMO+15  | 0.098408225 |
| T <sub>12</sub> | 3.2373 eV |  | HOMO-14 -> 309     | 0.030960673 |
|                 |           |  | HOMO-8 -> LUMO+10  | 0.043890919 |
|                 |           |  | HOMO-2 -> LUMO+10  | 0.697687594 |

|  |                 |           |                    |             |
|--|-----------------|-----------|--------------------|-------------|
|  |                 |           | HOMO -> LUMO+10    | 0.038820125 |
|  |                 |           | HOMO -> LUMO+17    | 0.100486445 |
|  | T <sub>13</sub> | 3.3148 eV | HOMO-4 -> LUMO     | 0.996984963 |
|  | T <sub>14</sub> | 3.3617 eV | HOMO-9 -> LUMO+7   | 0.061719898 |
|  |                 |           | HOMO -> LUMO+2     | 0.55398338  |
|  |                 |           | HOMO -> LUMO+4     | 0.02687953  |
|  |                 |           | HOMO -> LUMO+7     | 0.178407538 |
|  |                 |           | HOMO -> LUMO+8     | 0.02324168  |
|  |                 |           | HOMO -> LUMO+10    | 0.066117025 |
|  | T <sub>15</sub> | 3.3790 eV | HOMO-9 -> LUMO+7   | 0.067021927 |
|  |                 |           | HOMO -> LUMO+2     | 0.422004845 |
|  |                 |           | HOMO -> LUMO+4     | 0.025773581 |
|  |                 |           | HOMO -> LUMO+7     | 0.14587561  |
|  |                 |           | HOMO -> LUMO+8     | 0.02544768  |
|  |                 |           | HOMO -> LUMO+10    | 0.176382362 |
|  | T <sub>16</sub> | 3.3911 eV | HOMO-7 -> LUMO     | 0.024296897 |
|  |                 |           | HOMO-5 -> LUMO     | 0.95615089  |
|  | T <sub>17</sub> | 3.4190 eV | HOMO -> LUMO+3     | 0.965077245 |
|  |                 |           | HOMO -> LUMO+10    | 0.022663205 |
|  | T <sub>18</sub> | 3.4319 eV | HOMO-9 -> LUMO+7   | 0.073827874 |
|  |                 |           | HOMO -> LUMO+4     | 0.025633008 |
|  |                 |           | HOMO -> LUMO+7     | 0.132313968 |
|  |                 |           | HOMO -> LUMO+10    | 0.604758024 |
|  |                 |           | HOMO -> LUMO+11    | 0.022979392 |
|  | T <sub>19</sub> | 3.4507 eV | HOMO-23 -> LUMO+3  | 0.077263805 |
|  |                 |           | HOMO-22 -> LUMO    | 0.077917729 |
|  |                 |           | HOMO-6 -> LUMO     | 0.043459416 |
|  |                 |           | HOMO-6 -> LUMO+3   | 0.419015197 |
|  |                 |           | HOMO-6 -> LUMO+4   | 0.220501123 |
|  | T <sub>20</sub> | 3.4522 eV | HOMO-18 -> LUMO+5  | 0.029568256 |
|  |                 |           | HOMO-19 -> LUMO+1  | 0.028982689 |
|  |                 |           | HOMO-11 -> LUMO+13 | 0.020454554 |
|  |                 |           | HOMO-7 -> LUMO     | 0.232916775 |
|  |                 |           | HOMO-3 -> LUMO+1   | 0.038703184 |
|  |                 |           | HOMO-3 -> LUMO+4   | 0.051417831 |
|  |                 |           | HOMO-3 -> LUMO+5   | 0.194401066 |
|  |                 |           | HOMO-3 -> LUMO+8   | 0.273607634 |
|  | T <sub>21</sub> | 3.4576 eV | HOMO-7 -> LUMO     | 0.689513731 |
|  |                 |           | HOMO-5 -> LUMO     | 0.020951045 |
|  |                 |           | HOMO-3 -> LUMO+5   | 0.055364609 |



|  |                 |           |                    |             |
|--|-----------------|-----------|--------------------|-------------|
|  |                 |           | HOMO-3 -> LUMO+8   | 0.106869891 |
|  | T <sub>22</sub> | 3.4672 eV | HOMO-10 -> LUMO+15 | 0.038558645 |
|  |                 |           | HOMO-4 -> LUMO+9   | 0.021773671 |
|  |                 |           | HOMO-1 -> LUMO+2   | 0.02976312  |
|  |                 |           | HOMO-1 -> LUMO+6   | 0.130754752 |
|  |                 |           | HOMO-1 -> LUMO+9   | 0.70465069  |
|  | T <sub>23</sub> | 3.4874 eV | HOMO-1 -> LUMO+1   | 0.996730805 |
|  | T <sub>24</sub> | 3.4942 eV | HOMO-5 -> LUMO+1   | 0.032364768 |
|  |                 |           | HOMO-2 -> LUMO+1   | 0.947568845 |
|  | T <sub>25</sub> | 3.5123 eV | HOMO-18 -> LUMO+5  | 0.076863363 |
|  |                 |           | HOMO-19 -> LUMO+1  | 0.107675842 |
|  |                 |           | HOMO-16 -> LUMO+1  | 0.073130177 |
|  |                 |           | HOMO-3 -> LUMO+1   | 0.031626125 |
|  |                 |           | HOMO-3 -> LUMO+5   | 0.174605042 |
|  |                 |           | HOMO-3 -> LUMO+7   | 0.032344418 |
|  | T <sub>26</sub> | 3.5162 eV | HOMO-3 -> LUMO+8   | 0.38206037  |
|  |                 |           | HOMO-23 -> LUMO+3  | 0.066963361 |
|  |                 |           | HOMO-22 -> LUMO    | 0.098674589 |
|  |                 |           | HOMO-21 -> LUMO    | 0.023289136 |
|  |                 |           | HOMO-6 -> LUMO+3   | 0.095205025 |
|  |                 |           | HOMO-6 -> LUMO+4   | 0.511384071 |
|  |                 |           | HOMO-6 -> LUMO+5   | 0.06485041  |

**Table S4d** The singlet and triplet excited state transition configurations of the 2CN from single crystal revealed by TD-DFT calculations. The matched excited states that contain the same orbital transition components of S<sub>1</sub> and |S<sub>1</sub>-T<sub>n</sub>| < 0.3 eV were highlighted in red. (for the bottom interacted pair in Figure 5)

|                      | n                    | Energy           | Orbitals               | Transition         |
|----------------------|----------------------|------------------|------------------------|--------------------|
| <b>S<sub>n</sub></b> | <b>S<sub>1</sub></b> | <b>3.5528 eV</b> | <b>HOMO -&gt; LUMO</b> | <b>0.990584426</b> |
| T <sub>n</sub>       | T <sub>1</sub>       | 3.0425 eV        | HOMO-4 -> LUMO+1       | 0.844662034        |
|                      |                      |                  | HOMO-1 -> LUMO+10      | 0.045499378        |
|                      | T <sub>2</sub>       | 3.0435 eV        | HOMO-5 -> LUMO         | 0.811614442        |
|                      |                      |                  | HOMO-3 -> LUMO         | 0.03936818         |
|                      |                      |                  | HOMO-3 -> LUMO+9       | 0.040186125        |
|                      | T <sub>3</sub>       | 3.0459 eV        | HOMO-3 -> LUMO+2       | 0.034447875        |
|                      |                      |                  | HOMO-2 -> LUMO+2       | 0.79776133         |
|                      |                      |                  | HOMO -> LUMO+12        | 0.031385146        |
|                      | T <sub>4</sub>       | 3.1389 eV        | HOMO-5 -> LUMO         | 0.032466616        |
|                      |                      |                  | HOMO-3 -> LUMO         | 0.858416839        |

|                 |           |                   |             |
|-----------------|-----------|-------------------|-------------|
|                 |           | HOMO-2 -> LUMO    | 0.05235848  |
| T <sub>5</sub>  | 3.1634 eV | HOMO-1 -> LUMO+1  | 0.918988359 |
| T <sub>6</sub>  | 3.1912 eV | HOMO -> LUMO+2    | 0.9248272   |
| T <sub>7</sub>  | 3.5544 eV | HOMO -> LUMO      | 0.977202    |
| T <sub>8</sub>  | 3.8116 eV | HOMO-2 -> LUMO    | 0.05852989  |
|                 |           | HOMO-1 -> LUMO    | 0.892314405 |
| T <sub>9</sub>  | 3.8172 eV | HOMO-10 -> LUMO+8 | 0.14527128  |
|                 |           | HOMO-8 -> LUMO+6  | 0.141267386 |
|                 |           | HOMO-8 -> LUMO+7  | 0.077122354 |
|                 |           | HOMO-6 -> LUMO+8  | 0.031440289 |
|                 |           | HOMO-1 -> LUMO    | 0.027626602 |
|                 |           | HOMO -> LUMO+1    | 0.040829389 |
|                 |           | HOMO -> LUMO+6    | 0.051559027 |
|                 |           | HOMO -> LUMO+8    | 0.346644685 |
| T <sub>10</sub> | 3.8356 eV | HOMO-12 -> LUMO+6 | 0.028507944 |
|                 |           | HOMO-12 -> LUMO+7 | 0.037823501 |
|                 |           | HOMO-9 -> LUMO+5  | 0.14795712  |
|                 |           | HOMO-9 -> LUMO+7  | 0.02576904  |
|                 |           | HOMO-7 -> LUMO+6  | 0.022987968 |
|                 |           | HOMO-7 -> LUMO+7  | 0.041922497 |
|                 |           | HOMO-2 -> LUMO    | 0.266785906 |
|                 |           | HOMO-1 -> LUMO+5  | 0.118867128 |
|                 |           | HOMO-1 -> LUMO+6  | 0.081963907 |
|                 |           | HOMO-1 -> LUMO+7  | 0.067955098 |
| T <sub>11</sub> | 3.8387 eV | HOMO-9 -> LUMO+5  | 0.057297895 |
|                 |           | HOMO-3 -> LUMO    | 0.033742824 |
|                 |           | HOMO-2 -> LUMO    | 0.59470418  |
|                 |           | HOMO-1 -> LUMO    | 0.070921312 |
|                 |           | HOMO-1 -> LUMO+5  | 0.046494202 |
|                 |           | HOMO-1 -> LUMO+6  | 0.033055347 |
|                 |           | HOMO-1 -> LUMO+7  | 0.025398072 |
| T <sub>12</sub> | 3.8480 eV | HOMO-15 -> LUMO+3 | 0.070447565 |
|                 |           | HOMO-15 -> LUMO+9 | 0.024248424 |
|                 |           | HOMO-13 -> LUMO+3 | 0.064785601 |
|                 |           | HOMO-13 -> LUMO+4 | 0.160925991 |
|                 |           | HOMO-11 -> LUMO+3 | 0.0441045   |
|                 |           | HOMO-11 -> LUMO+4 | 0.113116705 |
|                 |           | HOMO-3 -> LUMO+3  | 0.367018849 |
| T <sub>13</sub> | 3.9399 eV | HOMO -> LUMO+1    | 0.930357123 |
| T <sub>14</sub> | 4.0749 eV | HOMO-16 -> LUMO+1 | 0.052313186 |

|  |                 |           |                   |             |
|--|-----------------|-----------|-------------------|-------------|
|  |                 |           | HOMO-12 -> LUMO+1 | 0.022163546 |
|  |                 |           | HOMO-7 -> LUMO+1  | 0.151569168 |
|  |                 |           | HOMO-7 -> LUMO+10 | 0.02068578  |
|  |                 |           | HOMO-7 -> LUMO+13 | 0.037286343 |
|  |                 |           | HOMO-4 -> LUMO+1  | 0.04917248  |
|  |                 |           | HOMO-4 -> LUMO+13 | 0.040875123 |
|  |                 |           | HOMO-4 -> LUMO+16 | 0.025159731 |
|  |                 |           | HOMO-1 -> LUMO+10 | 0.252490392 |
|  |                 |           | HOMO-1 -> LUMO+13 | 0.153701857 |
|  | T <sub>15</sub> | 4.0777 eV | HOMO-17 -> LUMO   | 0.042486125 |
|  |                 |           | HOMO-15 -> LUMO   | 0.040823674 |
|  |                 |           | HOMO-13 -> LUMO   | 0.03411272  |
|  |                 |           | HOMO-11 -> LUMO   | 0.087713473 |
|  |                 |           | HOMO-6 -> LUMO+2  | 0.02695842  |
|  |                 |           | HOMO-5 -> LUMO    | 0.044622794 |
|  |                 |           | HOMO-5 -> LUMO+11 | 0.02225628  |
|  |                 |           | HOMO-3 -> LUMO+9  | 0.208903552 |
|  |                 |           | HOMO-3 -> LUMO+11 | 0.089261575 |
|  |                 |           | HOMO-3 -> LUMO+12 | 0.036736762 |
|  |                 |           | HOMO -> LUMO+12   | 0.024398405 |
|  |                 |           | HOMO -> LUMO+14   | 0.02281248  |
|  | T <sub>16</sub> | 4.0810 eV | HOMO-14 -> LUMO+2 | 0.04986482  |
|  |                 |           | HOMO-6 -> LUMO+2  | 0.131779512 |
|  |                 |           | HOMO-6 -> LUMO+14 | 0.025919091 |
|  |                 |           | HOMO-3 -> LUMO+9  | 0.035762077 |
|  |                 |           | HOMO-3 -> LUMO+11 | 0.026284659 |
|  |                 |           | HOMO-2 -> LUMO+2  | 0.029141808 |
|  |                 |           | HOMO-2 -> LUMO+14 | 0.04057261  |
|  |                 |           | HOMO-2 -> LUMO+17 | 0.020861074 |
|  |                 |           | HOMO -> LUMO+11   | 0.064175114 |
|  |                 |           | HOMO -> LUMO+12   | 0.109999261 |
|  |                 |           | HOMO -> LUMO+14   | 0.111836122 |
|  | T <sub>17</sub> | 4.1331 eV | HOMO-17 -> LUMO   | 0.10405922  |
|  |                 |           | HOMO-15 -> LUMO+3 | 0.070928845 |
|  |                 |           | HOMO-15 -> LUMO+9 | 0.028003978 |
|  |                 |           | HOMO-13 -> LUMO+4 | 0.062594296 |
|  |                 |           | HOMO-11 -> LUMO+4 | 0.0528125   |
|  |                 |           | HOMO-11 -> LUMO+9 | 0.026316768 |
|  |                 |           | HOMO-5 -> LUMO    | 0.042032602 |
|  |                 |           | HOMO-5 -> LUMO+11 | 0.029904797 |

|  |                   |             |                    |             |
|--|-------------------|-------------|--------------------|-------------|
|  |                   |             | HOMO-3 -> LUMO+3   | 0.092949473 |
|  |                   |             | HOMO-3 -> LUMO+9   | 0.223325811 |
|  |                   |             | HOMO-3 -> LUMO+15  | 0.045959056 |
|  | T <sub>18</sub>   | 4.1339 eV   | HOMO-16 -> LUMO+1  | 0.096307827 |
|  |                   |             | HOMO-12 -> LUMO+6  | 0.029675352 |
|  |                   |             | HOMO-12 -> LUMO+7  | 0.025556083 |
|  |                   |             | HOMO-12 -> LUMO+10 | 0.022180392 |
|  |                   |             | HOMO-9 -> LUMO+5   | 0.070245016 |
|  |                   |             | HOMO-9 -> LUMO+7   | 0.020681712 |
|  |                   |             | HOMO-7 -> LUMO+10  | 0.044676583 |
|  |                   |             | HOMO-4 -> LUMO+1   | 0.044934024 |
|  |                   |             | HOMO-4 -> LUMO+10  | 0.02522258  |
|  |                   |             | HOMO-4 -> LUMO+13  | 0.047099943 |
|  |                   |             | HOMO-1 -> LUMO+5   | 0.039925728 |
|  |                   |             | HOMO-1 -> LUMO+6   | 0.034542433 |
|  |                   |             | HOMO-1 -> LUMO+10  | 0.255069389 |
|  |                   |             | HOMO-1 -> LUMO+13  | 0.02292797  |
|  |                   |             | HOMO-1 -> LUMO+16  | 0.046848605 |
|  |                   |             | T <sub>19</sub>    | 4.1522 eV   |
|  | HOMO-10 -> LUMO+8 | 0.062934424 |                    |             |
|  | HOMO-8 -> LUMO+6  | 0.05664978  |                    |             |
|  | HOMO-8 -> LUMO+7  | 0.033602689 |                    |             |
|  | HOMO-6 -> LUMO+12 | 0.031180039 |                    |             |
|  | HOMO-2 -> LUMO+2  | 0.05539789  |                    |             |
|  | HOMO-2 -> LUMO+14 | 0.037829002 |                    |             |
|  | HOMO -> LUMO+8    | 0.052916551 |                    |             |
|  | HOMO -> LUMO+11   | 0.106481895 |                    |             |
|  | HOMO -> LUMO+12   | 0.207522589 |                    |             |
|  |                   |             | HOMO -> LUMO+17    | 0.049681824 |
|  | T <sub>20</sub>   | 4.1563 eV   | HOMO-4 -> LUMO     | 0.998030176 |
|  | T <sub>21</sub>   | 4.1796 eV   | HOMO-1 -> LUMO+2   | 0.944157853 |
|  | T <sub>22</sub>   | 4.2450 eV   | HOMO-2 -> LUMO+1   | 0.984934195 |
|  | T <sub>23</sub>   | 4.2793 eV   | HOMO-10 -> LUMO+6  | 0.027387361 |
|  |                   |             | HOMO-10 -> LUMO+7  | 0.022155125 |
|  |                   |             | HOMO -> LUMO+5     | 0.052449127 |
|  |                   |             | HOMO -> LUMO+6     | 0.414268429 |
|  |                   |             | HOMO -> LUMO+7     | 0.305934064 |
|  |                   |             | HOMO -> LUMO+8     | 0.085267981 |
|  | T <sub>24</sub>   | 4.3426 eV   | HOMO-12 -> LUMO+5  | 0.021478354 |
|  |                   |             | HOMO-12 -> LUMO+7  | 0.026912    |

|  |                 |           |                  |             |
|--|-----------------|-----------|------------------|-------------|
|  |                 |           | HOMO-9 -> LUMO+5 | 0.028108205 |
|  |                 |           | HOMO-1 -> LUMO+2 | 0.02063293  |
|  |                 |           | HOMO-1 -> LUMO+4 | 0.028184128 |
|  |                 |           | HOMO-1 -> LUMO+5 | 0.393650645 |
|  |                 |           | HOMO-1 -> LUMO+6 | 0.03869762  |
|  |                 |           | HOMO-1 -> LUMO+7 | 0.306967466 |
|  | T <sub>25</sub> | 4.3616 eV | HOMO-3 -> LUMO+1 | 0.986029245 |
|  | T <sub>26</sub> | 4.3740 eV | HOMO-3 -> LUMO+2 | 0.887884728 |
|  |                 |           | HOMO-3 -> LUMO+4 | 0.033815602 |
|  |                 |           | HOMO-2 -> LUMO+2 | 0.040430305 |

**Table S4e** The singlet and triplet excited state transition configurations of the 3CN from single crystal revealed by TD-DFT calculations. The matched excited states that contain the same orbital transition components of S<sub>1</sub> and |S<sub>1</sub>-T<sub>n</sub>| < 0.3 eV were highlighted in red. (for the bottom interacted pair in Figure 5)

|                | n              | Energy    | Orbitals         | Transition  |
|----------------|----------------|-----------|------------------|-------------|
| S <sub>n</sub> | S <sub>1</sub> | 3.9501 eV | HOMO-2 -> LUMO   | 0.064462042 |
|                |                |           | HOMO-2 -> LUMO+2 | 0.05081672  |
|                |                |           | HOMO -> LUMO     | 0.724928405 |
|                |                |           | HOMO -> LUMO+2   | 0.090363507 |
| T <sub>n</sub> | T <sub>1</sub> | 3.2651 eV | HOMO-5 -> LUMO   | 0.12060925  |
|                |                |           | HOMO-5 -> LUMO+2 | 0.039525473 |
|                |                |           | HOMO-3 -> LUMO   | 0.078479296 |
|                |                |           | HOMO-3 -> LUMO+2 | 0.21687698  |
|                |                |           | HOMO-3 -> LUMO+6 | 0.020539591 |
|                |                |           | HOMO-2 -> LUMO+2 | 0.03050944  |
|                |                |           | HOMO-2 -> LUMO+6 | 0.020148274 |
|                |                |           | HOMO -> LUMO+6   | 0.097682    |
|                |                |           | HOMO -> LUMO+11  | 0.021823783 |
|                | T <sub>2</sub> | 3.2690 eV | HOMO-11 -> LUMO  | 0.02160289  |
|                |                |           | HOMO-5 -> LUMO   | 0.25499797  |
|                |                |           | HOMO-5 -> LUMO+2 | 0.034311521 |
|                |                |           | HOMO-3 -> LUMO+2 | 0.145562497 |
|                |                |           | HOMO-2 -> LUMO   | 0.054926237 |
|                |                |           | HOMO-2 -> LUMO+4 | 0.053543009 |
|                |                |           | HOMO-2 -> LUMO+5 | 0.031948864 |
|                |                |           | HOMO-2 -> LUMO+6 | 0.020268898 |
|                |                |           | HOMO -> LUMO+2   | 0.034552947 |

|  |                |           |                   |             |
|--|----------------|-----------|-------------------|-------------|
|  |                |           | HOMO -> LUMO+6    | 0.042003613 |
|  | T <sub>3</sub> | 3.2719 eV | HOMO-7 -> LUMO+1  | 0.032578834 |
|  |                |           | HOMO-4 -> LUMO+1  | 0.48607828  |
|  |                |           | HOMO-4 -> LUMO+3  | 0.04798802  |
|  |                |           | HOMO-1 -> LUMO+1  | 0.02285522  |
|  |                |           | HOMO-1 -> LUMO+3  | 0.114003125 |
|  |                |           | HOMO-1 -> LUMO+7  | 0.093260167 |
|  |                |           | HOMO-1 -> LUMO+9  | 0.02677298  |
|  | T <sub>4</sub> | 3.3672 eV | HOMO-5 -> LUMO    | 0.025887226 |
|  |                |           | HOMO-3 -> LUMO+2  | 0.0210125   |
|  |                |           | HOMO-2 -> LUMO    | 0.141107969 |
|  |                |           | HOMO-2 -> LUMO+2  | 0.168850227 |
|  |                |           | HOMO -> LUMO      | 0.375393795 |
|  |                |           | HOMO -> LUMO+2    | 0.130744525 |
|  | T <sub>5</sub> | 3.3853 eV | HOMO-5 -> LUMO    | 0.035027751 |
|  |                |           | HOMO-3 -> LUMO+2  | 0.03409705  |
|  |                |           | HOMO-2 -> LUMO    | 0.373317123 |
|  |                |           | HOMO -> LUMO+2    | 0.417789405 |
|  | T <sub>6</sub> | 3.4184 eV | HOMO-4 -> LUMO+1  | 0.026735969 |
|  |                |           | HOMO-1 -> LUMO+1  | 0.843856387 |
|  |                |           | HOMO -> LUMO+1    | 0.02333232  |
|  | T <sub>7</sub> | 3.6463 eV | HOMO-14 -> LUMO+4 | 0.036132096 |
|  |                |           | HOMO-14 -> LUMO+5 | 0.066919453 |
|  |                |           | HOMO-14 -> LUMO+8 | 0.021765325 |
|  |                |           | HOMO-13 -> LUMO+3 | 0.109390354 |
|  |                |           | HOMO-13 -> LUMO+7 | 0.032212296 |
|  |                |           | HOMO-4 -> LUMO+1  | 0.067653133 |
|  |                |           | HOMO-1 -> LUMO+3  | 0.37549778  |
|  | T <sub>8</sub> | 3.6502 eV | HOMO-12 -> LUMO+4 | 0.033810401 |
|  |                |           | HOMO-12 -> LUMO+9 | 0.0400445   |
|  |                |           | HOMO-11 -> LUMO+8 | 0.032385125 |
|  |                |           | HOMO-10 -> LUMO+8 | 0.024628682 |
|  |                |           | HOMO-9 -> LUMO+8  | 0.025434146 |
|  |                |           | HOMO-5 -> LUMO    | 0.044904051 |
|  |                |           | HOMO-2 -> LUMO+4  | 0.116818445 |
|  |                |           | HOMO-2 -> LUMO+5  | 0.050682912 |
|  |                |           | HOMO-1 -> LUMO+3  | 0.0471245   |
|  |                |           | HOMO -> LUMO+4    | 0.055697869 |
|  |                |           | HOMO -> LUMO+5    | 0.021706945 |
|  |                |           | HOMO -> LUMO+6    | 0.070883655 |

|  |                  |             |                    |             |
|--|------------------|-------------|--------------------|-------------|
|  | T <sub>9</sub>   | 3.6648 eV   | HOMO-12 -> LUMO+11 | 0.033966605 |
|  |                  |             | HOMO-10 -> LUMO+10 | 0.02835533  |
|  |                  |             | HOMO-9 -> LUMO+9   | 0.020515277 |
|  |                  |             | HOMO-9 -> LUMO+10  | 0.053844493 |
|  |                  |             | HOMO-8 -> LUMO+10  | 0.04780232  |
|  |                  |             | HOMO-7 -> LUMO+6   | 0.021769498 |
|  |                  |             | HOMO-7 -> LUMO+11  | 0.023099602 |
|  |                  |             | HOMO-6 -> LUMO+10  | 0.022522909 |
|  |                  |             | HOMO-6 -> LUMO+11  | 0.02645     |
|  |                  |             | HOMO-3 -> LUMO+2   | 0.048261031 |
|  |                  |             | HOMO-2 -> LUMO+4   | 0.029340109 |
|  |                  |             | HOMO-2 -> LUMO+6   | 0.061719898 |
|  |                  |             | HOMO -> LUMO+6     | 0.193230578 |
|  |                  |             | HOMO -> LUMO+11    | 0.03516552  |
|  |                  |             | T <sub>10</sub>    | 3.7741 eV   |
|  | HOMO-5 -> LUMO+2 | 0.029403125 |                    |             |
|  | HOMO-3 -> LUMO   | 0.03860309  |                    |             |
|  | HOMO-3 -> LUMO+2 | 0.086869456 |                    |             |
|  | HOMO-2 -> LUMO+4 | 0.035388641 |                    |             |
|  | HOMO-2 -> LUMO+5 | 0.025705514 |                    |             |
|  | HOMO-2 -> LUMO+7 | 0.050619256 |                    |             |
|  | HOMO-2 -> LUMO+9 | 0.0496125   |                    |             |
|  | HOMO -> LUMO+4   | 0.029403125 |                    |             |
|  | HOMO -> LUMO+6   | 0.087320205 |                    |             |
|  | HOMO -> LUMO+11  | 0.072215201 |                    |             |
|  | T <sub>11</sub>  | 3.7859 eV   | HOMO-5 -> LUMO     | 0.10960562  |
|  |                  |             | HOMO-3 -> LUMO+2   | 0.10266793  |
|  |                  |             | HOMO-2 -> LUMO+4   | 0.049536929 |
|  |                  |             | HOMO-2 -> LUMO+5   | 0.030474867 |
|  |                  |             | HOMO-2 -> LUMO+6   | 0.03488497  |
|  |                  |             | HOMO-2 -> LUMO+7   | 0.025651125 |
|  |                  |             | HOMO-2 -> LUMO+11  | 0.03426962  |
|  |                  |             | HOMO -> LUMO+6     | 0.057834005 |
|  |                  |             | HOMO -> LUMO+7     | 0.028236385 |
|  |                  |             | HOMO -> LUMO+9     | 0.046074337 |
|  |                  |             | HOMO -> LUMO+10    | 0.032860225 |
|  | HOMO -> LUMO+11  | 0.037488696 |                    |             |
|  | T <sub>12</sub>  | 3.7902 eV   | HOMO-14 -> LUMO+4  | 0.025416106 |
|  |                  |             | HOMO-14 -> LUMO+5  | 0.044910045 |
|  |                  |             | HOMO-13 -> LUMO+3  | 0.082109729 |

|                   |                  |                 |                   |             |
|-------------------|------------------|-----------------|-------------------|-------------|
|                   |                  |                 | HOMO-4 -> LUMO+1  | 0.245826696 |
|                   |                  |                 | HOMO-1 -> LUMO+3  | 0.072359688 |
|                   |                  |                 | HOMO-1 -> LUMO+5  | 0.037335514 |
|                   |                  |                 | HOMO-1 -> LUMO+7  | 0.208658    |
|                   |                  |                 | HOMO-1 -> LUMO+9  | 0.054087605 |
|                   | T <sub>13</sub>  | 4.0973 eV       | HOMO-3 -> LUMO+6  | 0.064304152 |
|                   |                  |                 | HOMO-2 -> LUMO    | 0.175480728 |
|                   |                  |                 | HOMO-2 -> LUMO+2  | 0.060190621 |
|                   |                  |                 | HOMO -> LUMO      | 0.347011143 |
|                   |                  |                 | HOMO -> LUMO+2    | 0.121347085 |
|                   | T <sub>14</sub>  | 4.1320 eV       | HOMO -> LUMO+10   | 0.022366125 |
|                   |                  |                 | HOMO-5 -> LUMO+4  | 0.192063624 |
|                   |                  |                 | HOMO-5 -> LUMO+5  | 0.100782541 |
|                   |                  |                 | HOMO-5 -> LUMO+7  | 0.066999962 |
|                   |                  |                 | HOMO-5 -> LUMO+9  | 0.040413245 |
|                   |                  |                 | HOMO-2 -> LUMO+2  | 0.025950976 |
|                   |                  |                 | HOMO-2 -> LUMO+7  | 0.027000232 |
|                   |                  |                 | HOMO-2 -> LUMO+9  | 0.041564211 |
|                   |                  |                 | HOMO-2 -> LUMO+12 | 0.062551845 |
|                   |                  |                 | HOMO-2 -> LUMO+14 | 0.02251442  |
|                   |                  |                 | HOMO -> LUMO      | 0.026087848 |
|                   |                  |                 | HOMO -> LUMO+2    | 0.033266522 |
|                   |                  |                 | T <sub>15</sub>   | 4.1340 eV   |
|                   | HOMO -> LUMO+12  | 0.022391512     |                   |             |
|                   | HOMO-7 -> LUMO+1 | 0.022459282     |                   |             |
|                   | HOMO-4 -> LUMO+3 | 0.292643101     |                   |             |
|                   | HOMO-4 -> LUMO+5 | 0.03246152      |                   |             |
|                   | HOMO-4 -> LUMO+7 | 0.173048445     |                   |             |
|                   | HOMO-4 -> LUMO+9 | 0.043329792     |                   |             |
|                   | HOMO-1 -> LUMO+7 | 0.072649096     |                   |             |
|                   | T <sub>16</sub>  | 4.1362 eV       | HOMO-1 -> LUMO+9  | 0.023479445 |
|                   |                  |                 | HOMO-1 -> LUMO+13 | 0.094734339 |
|                   |                  |                 | HOMO-3 -> LUMO+6  | 0.269686368 |
| HOMO-3 -> LUMO+11 |                  |                 | 0.040163448       |             |
| HOMO-2 -> LUMO    |                  |                 | 0.069975405       |             |
| HOMO -> LUMO      |                  |                 | 0.100396805       |             |
| HOMO -> LUMO+4    |                  |                 | 0.039076897       |             |
| HOMO -> LUMO+8    |                  |                 | 0.036379834       |             |
|                   |                  | HOMO -> LUMO+9  | 0.027452931       |             |
|                   |                  | HOMO -> LUMO+11 | 0.03601928        |             |



|  |                 |           |                   |             |
|--|-----------------|-----------|-------------------|-------------|
|  |                 |           | HOMO -> LUMO+12   | 0.026459201 |
|  |                 |           | HOMO -> LUMO+14   | 0.04158728  |
|  | T <sub>17</sub> | 4.1699 eV | HOMO-13 -> LUMO+4 | 0.023449117 |
|  |                 |           | HOMO-13 -> LUMO+5 | 0.041824104 |
|  |                 |           | HOMO-1 -> LUMO+4  | 0.300684615 |
|  |                 |           | HOMO-1 -> LUMO+5  | 0.428886173 |
|  |                 |           | HOMO-1 -> LUMO+7  | 0.023488114 |
|  |                 |           | HOMO-1 -> LUMO+8  | 0.028184128 |
|  |                 |           | HOMO-1 -> LUMO+9  | 0.022285827 |
|  |                 |           | HOMO -> LUMO+5    | 0.026339715 |
|  | T <sub>18</sub> | 4.2055 eV | HOMO-3 -> LUMO+6  | 0.057582605 |
|  |                 |           | HOMO-2 -> LUMO    | 0.027527965 |
|  |                 |           | HOMO-2 -> LUMO+1  | 0.02063293  |
|  |                 |           | HOMO-2 -> LUMO+2  | 0.261726125 |
|  |                 |           | HOMO-2 -> LUMO+4  | 0.021936746 |
|  |                 |           | HOMO-2 -> LUMO+5  | 0.034369176 |
|  |                 |           | HOMO-2 -> LUMO+8  | 0.08206921  |
|  |                 |           | HOMO -> LUMO      | 0.03020882  |
|  |                 |           | HOMO -> LUMO+1    | 0.084444061 |
|  |                 |           | HOMO -> LUMO+2    | 0.037035533 |
|  |                 |           | HOMO -> LUMO+5    | 0.037873024 |
|  |                 |           | HOMO -> LUMO+8    | 0.070530168 |
|  | T <sub>19</sub> | 4.2405 eV | HOMO-5 -> LUMO+4  | 0.10441536  |
|  |                 |           | HOMO-5 -> LUMO+5  | 0.068161704 |
|  |                 |           | HOMO-5 -> LUMO+7  | 0.02522258  |
|  |                 |           | HOMO-4 -> LUMO+3  | 0.026270904 |
|  |                 |           | HOMO-3 -> LUMO+6  | 0.029563393 |
|  |                 |           | HOMO-2 -> LUMO+2  | 0.087119728 |
|  |                 |           | HOMO-1 -> LUMO+3  | 0.022037402 |
|  |                 |           | HOMO -> LUMO+1    | 0.11347848  |
|  |                 |           | HOMO -> LUMO+2    | 0.039222403 |
|  |                 |           | HOMO -> LUMO+4    | 0.066473872 |
|  |                 |           | HOMO -> LUMO+9    | 0.025678312 |
|  | T <sub>20</sub> | 4.2472 eV | HOMO-14 -> LUMO+4 | 0.041207463 |
|  |                 |           | HOMO-14 -> LUMO+5 | 0.070830952 |
|  |                 |           | HOMO-5 -> LUMO+4  | 0.020325312 |
|  |                 |           | HOMO-4 -> LUMO+1  | 0.041581512 |
|  |                 |           | HOMO-4 -> LUMO+3  | 0.145228162 |
|  |                 |           | HOMO-4 -> LUMO+7  | 0.054866594 |
|  |                 |           | HOMO-1 -> LUMO+3  | 0.138148705 |

|                 |                   |                   |                   |             |
|-----------------|-------------------|-------------------|-------------------|-------------|
|                 |                   |                   | HOMO-1 -> LUMO+7  | 0.04512008  |
|                 |                   |                   | HOMO-1 -> LUMO+13 | 0.069908083 |
|                 | T <sub>21</sub>   | 4.2667 eV         | HOMO-3 -> LUMO+6  | 0.153879329 |
|                 |                   |                   | HOMO -> LUMO+1    | 0.450547274 |
|                 |                   |                   | HOMO -> LUMO+6    | 0.039920077 |
|                 |                   |                   | HOMO -> LUMO+11   | 0.033878045 |
|                 |                   |                   | HOMO -> LUMO+12   | 0.021744466 |
|                 |                   |                   | HOMO -> LUMO+14   | 0.027228445 |
|                 |                   |                   | T <sub>22</sub>   | 4.2750 eV   |
|                 | HOMO-5 -> LUMO+5  | 0.036856125       |                   |             |
|                 | HOMO-3 -> LUMO+6  | 0.078123139       |                   |             |
|                 | HOMO-2 -> LUMO+1  | 0.03273217        |                   |             |
|                 | HOMO-2 -> LUMO+4  | 0.076863363       |                   |             |
|                 | HOMO-2 -> LUMO+9  | 0.034416385       |                   |             |
|                 | HOMO-2 -> LUMO+14 | 0.022315394       |                   |             |
|                 | HOMO -> LUMO+1    | 0.231662631       |                   |             |
|                 | HOMO -> LUMO+11   | 0.022829571       |                   |             |
|                 | HOMO -> LUMO+12   | 0.047759042       |                   |             |
|                 | T <sub>23</sub>   | 4.3248 eV         | HOMO-2 -> LUMO+2  | 0.14247122  |
|                 |                   |                   | HOMO-2 -> LUMO+5  | 0.022761245 |
|                 |                   |                   | HOMO-2 -> LUMO+8  | 0.049329405 |
|                 |                   |                   | HOMO-1 -> LUMO    | 0.080769843 |
|                 |                   |                   | HOMO-1 -> LUMO+2  | 0.020738698 |
|                 |                   |                   | HOMO -> LUMO      | 0.03730273  |
|                 |                   |                   | HOMO -> LUMO+1    | 0.023134005 |
|                 |                   |                   | HOMO -> LUMO+3    | 0.038619763 |
|                 |                   |                   | HOMO -> LUMO+4    | 0.021358311 |
|                 |                   |                   | HOMO -> LUMO+5    | 0.036845266 |
|                 |                   |                   | HOMO -> LUMO+6    | 0.020478832 |
|                 |                   |                   | HOMO -> LUMO+8    | 0.054999178 |
| HOMO -> LUMO+9  |                   |                   | 0.029680225       |             |
| HOMO -> LUMO+10 |                   |                   | 0.121110733       |             |
| HOMO -> LUMO+11 |                   |                   | 0.053982408       |             |
| T <sub>24</sub> | 4.3373 eV         | HOMO-2 -> LUMO+2  | 0.036888712       |             |
|                 |                   | HOMO-1 -> LUMO    | 0.686393578       |             |
|                 |                   | HOMO-1 -> LUMO+2  | 0.173684392       |             |
| T <sub>25</sub> | 4.3543 eV         | HOMO-2 -> LUMO    | 0.051880647       |             |
|                 |                   | HOMO-2 -> LUMO+2  | 0.071124833       |             |
|                 |                   | HOMO-2 -> LUMO+8  | 0.056905885       |             |
|                 |                   | HOMO-2 -> LUMO+10 | 0.0340605         |             |

|  |                 |           |                  |             |
|--|-----------------|-----------|------------------|-------------|
|  |                 |           | HOMO -> LUMO+2   | 0.03074704  |
|  |                 |           | HOMO -> LUMO+5   | 0.024033089 |
|  |                 |           | HOMO -> LUMO+9   | 0.032237683 |
|  |                 |           | HOMO -> LUMO+10  | 0.341881805 |
|  |                 |           | HOMO -> LUMO+11  | 0.025592269 |
|  | T <sub>26</sub> | 4.4132 eV | HOMO-2 -> LUMO+4 | 0.026638936 |
|  |                 |           | HOMO-2 -> LUMO+5 | 0.027116547 |
|  |                 |           | HOMO -> LUMO+3   | 0.440804162 |
|  |                 |           | HOMO -> LUMO+4   | 0.257374426 |
|  |                 |           | HOMO -> LUMO+7   | 0.02477538  |

**Table S5** The ellipsoid plot of XCN crystal.

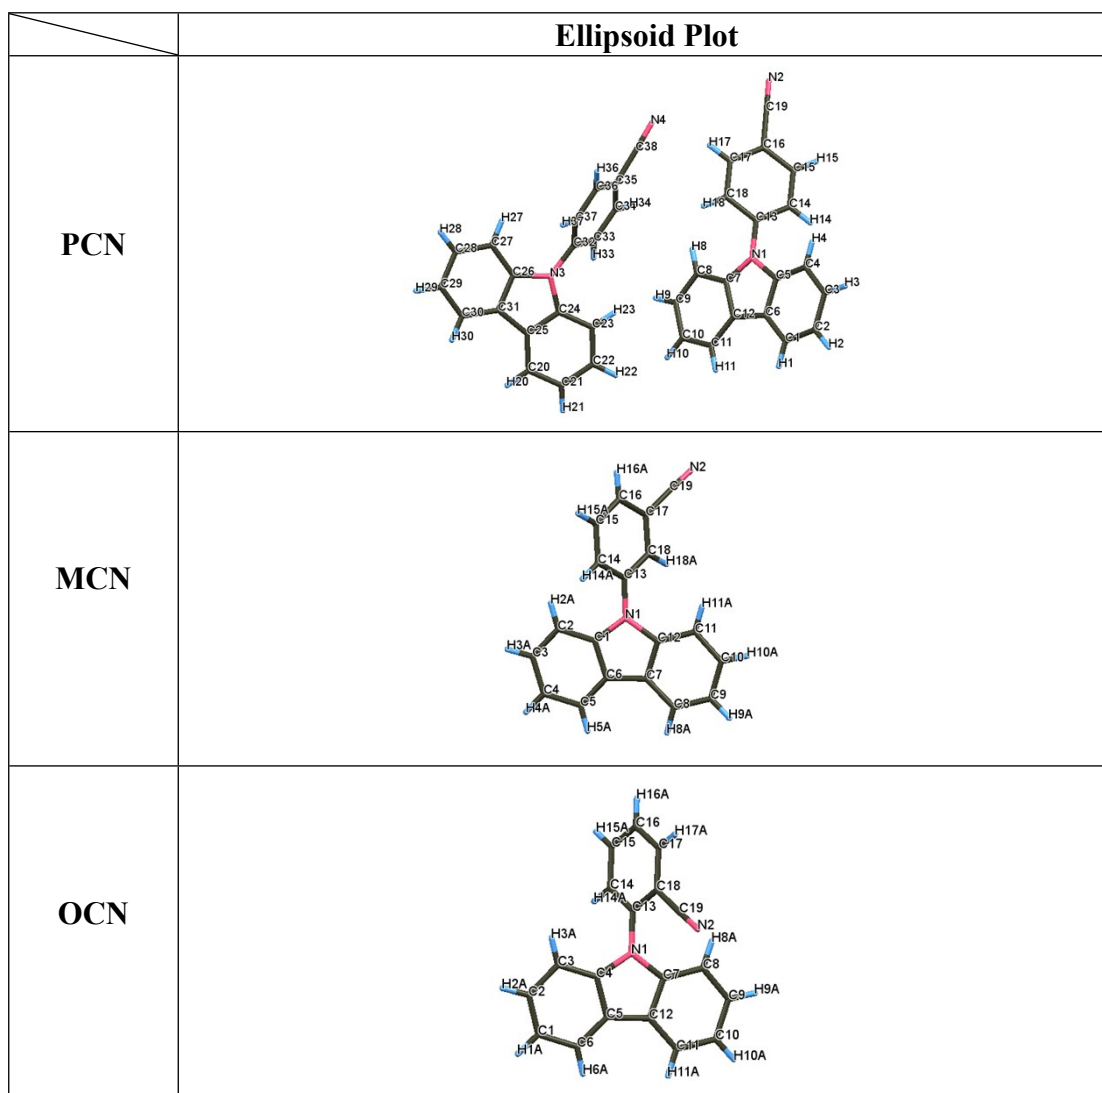

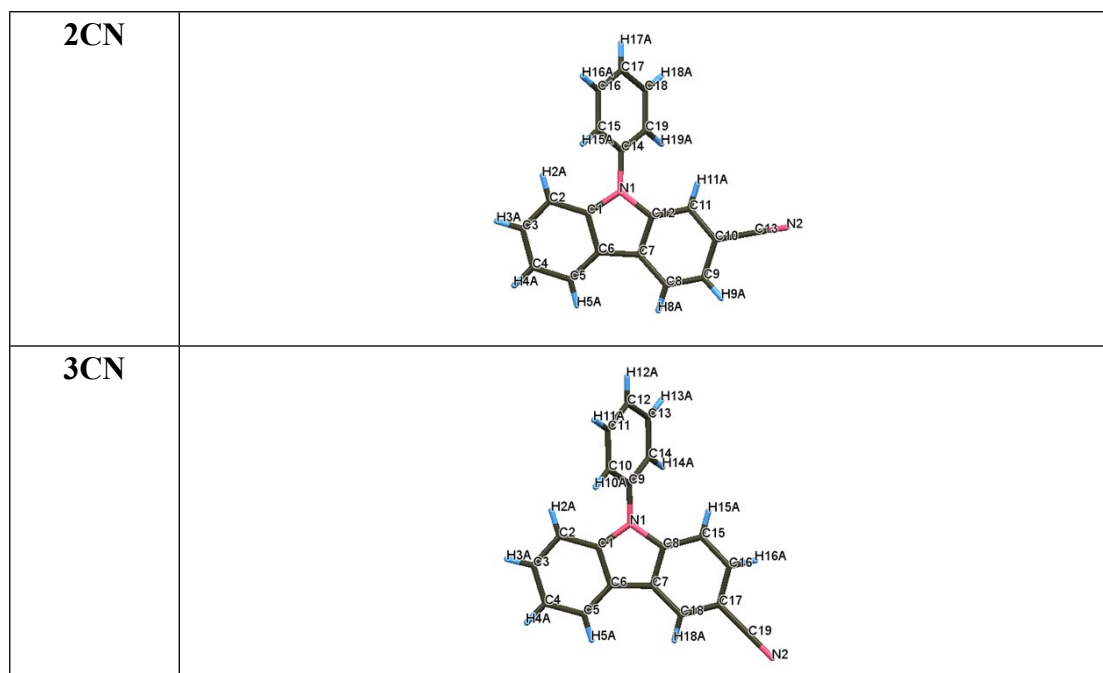

**Table S6a** The bond lengths of PCN in X-ray crystal structure.

| <i>Number</i> | <i>Atom1</i> | <i>Atom2</i> | <i>Cyclicity</i> | <i>Length</i> |
|---------------|--------------|--------------|------------------|---------------|
| 1             | C1           | H1           | acyclic          | 0.95          |
| 2             | C1           | C2           | cyclic           | 1.376(4)      |
| 3             | C1           | C6           | cyclic           | 1.392(3)      |
| 4             | C2           | H2           | acyclic          | 0.95          |
| 5             | C2           | C3           | cyclic           | 1.379(4)      |
| 6             | C3           | H3           | acyclic          | 0.95          |
| 7             | C3           | C4           | cyclic           | 1.373(3)      |
| 8             | C4           | H4           | acyclic          | 0.95          |
| 9             | C4           | C5           | cyclic           | 1.382(3)      |
| 10            | C5           | C6           | cyclic           | 1.391(3)      |
| 11            | C5           | N1           | cyclic           | 1.396(3)      |
| 12            | C6           | C12          | cyclic           | 1.443(3)      |
| 13            | C7           | C8           | cyclic           | 1.393(3)      |
| 14            | C7           | C12          | cyclic           | 1.394(3)      |
| 15            | C7           | N1           | cyclic           | 1.391(3)      |
| 16            | C8           | H8           | acyclic          | 0.95          |
| 17            | C8           | C9           | cyclic           | 1.370(3)      |
| 18            | C9           | H9           | acyclic          | 0.95          |
| 19            | C9           | C10          | cyclic           | 1.385(4)      |
| 20            | C10          | H10          | acyclic          | 0.95          |
| 21            | C10          | C11          | cyclic           | 1.367(4)      |
| 22            | C11          | H11          | acyclic          | 0.95          |
| 23            | C11          | C12          | cyclic           | 1.387(3)      |
| 24            | C13          | C14          | cyclic           | 1.375(3)      |
| 25            | C13          | C18          | cyclic           | 1.381(3)      |

|           |     |     |         |          |
|-----------|-----|-----|---------|----------|
| <b>26</b> | C13 | N1  | acyclic | 1.414(2) |
| <b>27</b> | C14 | H14 | acyclic | 0.95     |
| <b>28</b> | C14 | C15 | cyclic  | 1.367(3) |
| <b>29</b> | C15 | H15 | acyclic | 0.95     |
| <b>30</b> | C15 | C16 | cyclic  | 1.378(3) |
| <b>31</b> | C16 | C17 | cyclic  | 1.367(3) |
| <b>32</b> | C16 | C19 | acyclic | 1.435(3) |
| <b>33</b> | C17 | H17 | acyclic | 0.95     |
| <b>34</b> | C17 | C18 | cyclic  | 1.370(3) |
| <b>35</b> | C18 | H18 | acyclic | 0.95     |
| <b>36</b> | C19 | N2  | acyclic | 1.137(3) |
| <b>37</b> | C20 | H20 | acyclic | 0.95     |
| <b>38</b> | C20 | C21 | cyclic  | 1.370(3) |
| <b>39</b> | C20 | C25 | cyclic  | 1.390(3) |
| <b>40</b> | C21 | H21 | acyclic | 0.95     |
| <b>41</b> | C21 | C22 | cyclic  | 1.386(3) |
| <b>42</b> | C22 | H22 | acyclic | 0.95     |
| <b>43</b> | C22 | C23 | cyclic  | 1.377(3) |
| <b>44</b> | C23 | H23 | acyclic | 0.95     |
| <b>45</b> | C23 | C24 | cyclic  | 1.378(3) |
| <b>46</b> | C24 | C25 | cyclic  | 1.402(3) |
| <b>47</b> | C24 | N3  | cyclic  | 1.392(2) |
| <b>48</b> | C25 | C31 | cyclic  | 1.433(3) |
| <b>49</b> | C26 | C27 | cyclic  | 1.384(3) |
| <b>50</b> | C26 | C31 | cyclic  | 1.397(3) |
| <b>51</b> | C26 | N3  | cyclic  | 1.393(2) |
| <b>52</b> | C27 | H27 | acyclic | 0.95     |
| <b>53</b> | C27 | C28 | cyclic  | 1.375(3) |
| <b>54</b> | C28 | H28 | acyclic | 0.95     |
| <b>55</b> | C28 | C29 | cyclic  | 1.389(3) |
| <b>56</b> | C29 | H29 | acyclic | 0.95     |
| <b>57</b> | C29 | C30 | cyclic  | 1.365(3) |
| <b>58</b> | C30 | H30 | acyclic | 0.95     |
| <b>59</b> | C30 | C31 | cyclic  | 1.380(3) |
| <b>60</b> | C32 | C33 | cyclic  | 1.380(3) |
| <b>61</b> | C32 | C37 | cyclic  | 1.379(3) |
| <b>62</b> | C32 | N3  | acyclic | 1.410(2) |
| <b>63</b> | C33 | H33 | acyclic | 0.95     |
| <b>64</b> | C33 | C34 | cyclic  | 1.366(2) |
| <b>65</b> | C34 | H34 | acyclic | 0.95     |
| <b>66</b> | C34 | C35 | cyclic  | 1.382(3) |
| <b>67</b> | C35 | C36 | cyclic  | 1.381(3) |
| <b>68</b> | C35 | C38 | acyclic | 1.435(2) |
| <b>69</b> | C36 | H36 | acyclic | 0.95     |

|           |     |     |         |          |
|-----------|-----|-----|---------|----------|
| <b>70</b> | C36 | C37 | cyclic  | 1.371(2) |
| <b>71</b> | C37 | H37 | acyclic | 0.95     |
| <b>72</b> | C38 | N4  | acyclic | 1.141(2) |

**Table S6b** The bond lengths of MCN in X-ray crystal structure.

| <b>Number</b> | <b>Atom1</b> | <b>Atom2</b> | <b>Cyclicity</b> | <b>Length</b> |
|---------------|--------------|--------------|------------------|---------------|
| <b>1</b>      | N1           | C1           | cyclic           | 1.383(6)      |
| <b>2</b>      | N1           | C12          | cyclic           | 1.375(5)      |
| <b>3</b>      | N1           | C13          | acyclic          | 1.403(5)      |
| <b>4</b>      | N2           | C19          | acyclic          | 1.130(7)      |
| <b>5</b>      | C1           | C2           | cyclic           | 1.366(6)      |
| <b>6</b>      | C1           | C6           | cyclic           | 1.362(6)      |
| <b>7</b>      | C2           | H2A          | acyclic          | 0.93          |
| <b>8</b>      | C2           | C3           | cyclic           | 1.368(8)      |
| <b>9</b>      | C3           | H3A          | acyclic          | 0.929         |
| <b>10</b>     | C3           | C4           | cyclic           | 1.362(8)      |
| <b>11</b>     | C4           | H4A          | acyclic          | 0.93          |
| <b>12</b>     | C4           | C5           | cyclic           | 1.365(8)      |
| <b>13</b>     | C5           | H5A          | acyclic          | 0.931         |
| <b>14</b>     | C5           | C6           | cyclic           | 1.367(7)      |
| <b>15</b>     | C6           | C7           | cyclic           | 1.415(6)      |
| <b>16</b>     | C7           | C8           | cyclic           | 1.374(6)      |
| <b>17</b>     | C7           | C12          | cyclic           | 1.386(6)      |
| <b>18</b>     | C8           | H8A          | acyclic          | 0.93          |
| <b>19</b>     | C8           | C9           | cyclic           | 1.347(8)      |
| <b>20</b>     | C9           | H9A          | acyclic          | 0.93          |
| <b>21</b>     | C9           | C10          | cyclic           | 1.375(8)      |
| <b>22</b>     | C10          | H10A         | acyclic          | 0.93          |
| <b>23</b>     | C10          | C11          | cyclic           | 1.373(7)      |
| <b>24</b>     | C11          | H11A         | acyclic          | 0.93          |
| <b>25</b>     | C11          | C12          | cyclic           | 1.366(7)      |
| <b>26</b>     | C13          | C14          | cyclic           | 1.386(6)      |
| <b>27</b>     | C13          | C18          | cyclic           | 1.367(7)      |
| <b>28</b>     | C14          | H14A         | acyclic          | 0.93          |
| <b>29</b>     | C14          | C15          | cyclic           | 1.362(6)      |
| <b>30</b>     | C15          | H15A         | acyclic          | 0.929         |
| <b>31</b>     | C15          | C16          | cyclic           | 1.361(7)      |
| <b>32</b>     | C16          | H16A         | acyclic          | 0.93          |
| <b>33</b>     | C16          | C17          | cyclic           | 1.381(6)      |
| <b>34</b>     | C17          | C18          | cyclic           | 1.366(6)      |
| <b>35</b>     | C17          | C19          | acyclic          | 1.408(6)      |
| <b>36</b>     | C18          | H18A         | acyclic          | 0.93          |

**Table S6c** The bond lengths of OCN in X-ray crystal structure.

| <i>Number</i> | <i>Atom1</i> | <i>Atom2</i> | <i>Cyclicity</i> | <i>Length</i> |
|---------------|--------------|--------------|------------------|---------------|
| 1             | C1           | H1A          | acyclic          | 0.93          |
| 2             | C1           | C2           | cyclic           | 1.368(6)      |
| 3             | C1           | C6           | cyclic           | 1.376(5)      |
| 4             | C2           | H2A          | acyclic          | 0.93          |
| 5             | C2           | C3           | cyclic           | 1.387(4)      |
| 6             | C3           | H3A          | acyclic          | 0.93          |
| 7             | C3           | C4           | cyclic           | 1.381(4)      |
| 8             | C4           | C5           | cyclic           | 1.403(4)      |
| 9             | C4           | N1           | cyclic           | 1.401(3)      |
| 10            | C5           | C6           | cyclic           | 1.393(4)      |
| 11            | C5           | C12          | cyclic           | 1.447(4)      |
| 12            | C6           | H6A          | acyclic          | 0.93          |
| 13            | C7           | C8           | cyclic           | 1.386(3)      |
| 14            | C7           | C12          | cyclic           | 1.404(3)      |
| 15            | C7           | N1           | cyclic           | 1.399(3)      |
| 16            | C8           | H8A          | acyclic          | 0.93          |
| 17            | C8           | C9           | cyclic           | 1.381(3)      |
| 18            | C9           | H9A          | acyclic          | 0.93          |
| 19            | C9           | C10          | cyclic           | 1.391(4)      |
| 20            | C10          | H10A         | acyclic          | 0.93          |
| 21            | C10          | C11          | cyclic           | 1.375(5)      |
| 22            | C11          | H11A         | acyclic          | 0.93          |
| 23            | C11          | C12          | cyclic           | 1.399(3)      |
| 24            | C13          | C14          | cyclic           | 1.388(3)      |
| 25            | C13          | C18          | cyclic           | 1.397(3)      |
| 26            | C13          | N1           | acyclic          | 1.415(3)      |
| 27            | C14          | H14A         | acyclic          | 0.93          |
| 28            | C14          | C15          | cyclic           | 1.380(4)      |
| 29            | C15          | H15A         | acyclic          | 0.93          |
| 30            | C15          | C16          | cyclic           | 1.373(4)      |
| 31            | C16          | H16A         | acyclic          | 0.93          |
| 32            | C16          | C17          | cyclic           | 1.372(5)      |
| 33            | C17          | H17A         | acyclic          | 0.93          |
| 34            | C17          | C18          | cyclic           | 1.394(4)      |
| 35            | C18          | C19          | acyclic          | 1.434(4)      |
| 36            | C19          | N2           | acyclic          | 1.143(4)      |

**Table S6d** The bond lengths of 2CN in X-ray crystal structure.

| <i>Number</i> | <i>Atom1</i> | <i>Atom2</i> | <i>Cyclicity</i> | <i>Length</i> |
|---------------|--------------|--------------|------------------|---------------|
|---------------|--------------|--------------|------------------|---------------|

|           |     |      |         |          |
|-----------|-----|------|---------|----------|
| <b>1</b>  | N1  | C1   | cyclic  | 1.387(2) |
| <b>2</b>  | N1  | C12  | cyclic  | 1.386(2) |
| <b>3</b>  | N1  | C14  | acyclic | 1.423(2) |
| <b>4</b>  | N2  | C13  | acyclic | 1.142(3) |
| <b>5</b>  | C1  | C2   | cyclic  | 1.377(3) |
| <b>6</b>  | C1  | C6   | cyclic  | 1.403(2) |
| <b>7</b>  | C2  | H2A  | acyclic | 0.93     |
| <b>8</b>  | C2  | C3   | cyclic  | 1.371(3) |
| <b>9</b>  | C3  | H3A  | acyclic | 0.929    |
| <b>10</b> | C3  | C4   | cyclic  | 1.389(3) |
| <b>11</b> | C4  | H4A  | acyclic | 0.93     |
| <b>12</b> | C4  | C5   | cyclic  | 1.358(3) |
| <b>13</b> | C5  | H5A  | acyclic | 0.93     |
| <b>14</b> | C5  | C6   | cyclic  | 1.393(3) |
| <b>15</b> | C6  | C7   | cyclic  | 1.437(3) |
| <b>16</b> | C7  | C8   | cyclic  | 1.387(2) |
| <b>17</b> | C7  | C12  | cyclic  | 1.408(2) |
| <b>18</b> | C8  | H8A  | acyclic | 0.93     |
| <b>19</b> | C8  | C9   | cyclic  | 1.359(3) |
| <b>20</b> | C9  | H9A  | acyclic | 0.93     |
| <b>21</b> | C9  | C10  | cyclic  | 1.401(3) |
| <b>22</b> | C10 | C11  | cyclic  | 1.384(2) |
| <b>23</b> | C10 | C13  | acyclic | 1.425(3) |
| <b>24</b> | C11 | H11A | acyclic | 0.93     |
| <b>25</b> | C11 | C12  | cyclic  | 1.374(3) |
| <b>26</b> | C14 | C15  | cyclic  | 1.375(3) |
| <b>27</b> | C14 | C19  | cyclic  | 1.373(3) |
| <b>28</b> | C15 | H15A | acyclic | 0.93     |
| <b>29</b> | C15 | C16  | cyclic  | 1.377(3) |
| <b>30</b> | C16 | H16A | acyclic | 0.93     |
| <b>31</b> | C16 | C17  | cyclic  | 1.360(4) |
| <b>32</b> | C17 | H17A | acyclic | 0.93     |
| <b>33</b> | C17 | C18  | cyclic  | 1.365(3) |
| <b>34</b> | C18 | H18A | acyclic | 0.93     |
| <b>35</b> | C18 | C19  | cyclic  | 1.387(3) |
| <b>36</b> | C19 | H19A | acyclic | 0.93     |

**Table S6e** The bond lengths of 3CN in X-ray crystal structure.

| <b>Number</b> | <b>Atom1</b> | <b>Atom2</b> | <b>Cyclicity</b> | <b>Length</b> |
|---------------|--------------|--------------|------------------|---------------|
| <b>1</b>      | C9           | C10          | cyclic           | 1.390(2)      |
| <b>2</b>      | C9           | C14          | cyclic           | 1.390(2)      |
| <b>3</b>      | C9           | N1           | acyclic          | 1.399(2)      |
| <b>4</b>      | C10          | H10A         | acyclic          | 0.93          |



|    |     |      |         |          |
|----|-----|------|---------|----------|
| 5  | C10 | C11  | cyclic  | 1.390(2) |
| 6  | C11 | H11A | acyclic | 0.93     |
| 7  | C11 | C12  | cyclic  | 1.390(3) |
| 8  | C12 | H12A | acyclic | 0.93     |
| 9  | C12 | C13  | cyclic  | 1.390(3) |
| 10 | C13 | H13A | acyclic | 0.929    |
| 11 | C13 | C14  | cyclic  | 1.390(2) |
| 12 | C14 | H14A | acyclic | 0.93     |
| 13 | N1  | C1   | cyclic  | 1.388(3) |
| 14 | N1  | C8   | cyclic  | 1.375(3) |
| 15 | N2  | C19  | acyclic | 1.138(4) |
| 16 | C1  | C2   | cyclic  | 1.373(4) |
| 17 | C1  | C6   | cyclic  | 1.397(3) |
| 18 | C2  | H2A  | acyclic | 0.93     |
| 19 | C2  | C3   | cyclic  | 1.370(4) |
| 20 | C3  | H3A  | acyclic | 0.93     |
| 21 | C3  | C4   | cyclic  | 1.379(4) |
| 22 | C4  | H4A  | acyclic | 0.931    |
| 23 | C4  | C5   | cyclic  | 1.365(4) |
| 24 | C5  | H5A  | acyclic | 0.93     |
| 25 | C5  | C6   | cyclic  | 1.382(4) |
| 26 | C6  | C7   | cyclic  | 1.434(3) |
| 27 | C7  | C8   | cyclic  | 1.407(3) |
| 28 | C7  | C18  | cyclic  | 1.379(3) |
| 29 | C8  | C15  | cyclic  | 1.380(3) |
| 30 | C15 | H15A | acyclic | 0.93     |
| 31 | C15 | C16  | cyclic  | 1.366(3) |
| 32 | C16 | H16A | acyclic | 0.93     |
| 33 | C16 | C17  | cyclic  | 1.391(3) |
| 34 | C17 | C18  | cyclic  | 1.382(3) |
| 35 | C17 | C19  | acyclic | 1.429(4) |
| 36 | C18 | H18A | acyclic | 0.931    |

**Table S7a** The bond angles of PCN in X-ray crystal structure.

| <i>Number</i> | <i>Atom1</i> | <i>Atom2</i> | <i>Atom3</i> | <i>Angle</i> |
|---------------|--------------|--------------|--------------|--------------|
| 1             | H1           | C1           | C2           | 120.8        |
| 2             | H1           | C1           | C6           | 120.8        |
| 3             | C2           | C1           | C6           | 118.3(2)     |
| 4             | C1           | C2           | H2           | 119.4        |
| 5             | C1           | C2           | C3           | 121.3(2)     |
| 6             | H2           | C2           | C3           | 119.3        |
| 7             | C2           | C3           | H3           | 119.3        |
| 8             | C2           | C3           | C4           | 121.3(2)     |

|           |     |     |     |          |
|-----------|-----|-----|-----|----------|
| <b>9</b>  | H3  | C3  | C4  | 119.4    |
| <b>10</b> | C3  | C4  | H4  | 121.2    |
| <b>11</b> | C3  | C4  | C5  | 117.6(2) |
| <b>12</b> | H4  | C4  | C5  | 121.2    |
| <b>13</b> | C4  | C5  | C6  | 121.9(2) |
| <b>14</b> | C4  | C5  | N1  | 129.1(2) |
| <b>15</b> | C6  | C5  | N1  | 108.9(2) |
| <b>16</b> | C1  | C6  | C5  | 119.5(2) |
| <b>17</b> | C1  | C6  | C12 | 133.5(2) |
| <b>18</b> | C5  | C6  | C12 | 107.0(2) |
| <b>19</b> | C8  | C7  | C12 | 121.7(2) |
| <b>20</b> | C8  | C7  | N1  | 129.4(2) |
| <b>21</b> | C12 | C7  | N1  | 108.9(2) |
| <b>22</b> | C7  | C8  | H8  | 121.3    |
| <b>23</b> | C7  | C8  | C9  | 117.4(2) |
| <b>24</b> | H8  | C8  | C9  | 121.3    |
| <b>25</b> | C8  | C9  | H9  | 119.2    |
| <b>26</b> | C8  | C9  | C10 | 121.6(2) |
| <b>27</b> | H9  | C9  | C10 | 119.2    |
| <b>28</b> | C9  | C10 | H10 | 119.6    |
| <b>29</b> | C9  | C10 | C11 | 120.9(2) |
| <b>30</b> | H10 | C10 | C11 | 119.5    |
| <b>31</b> | C10 | C11 | H11 | 120.4    |
| <b>32</b> | C10 | C11 | C12 | 119.1(2) |
| <b>33</b> | H11 | C11 | C12 | 120.4    |
| <b>34</b> | C6  | C12 | C7  | 107.0(2) |
| <b>35</b> | C6  | C12 | C11 | 133.7(2) |
| <b>36</b> | C7  | C12 | C11 | 119.3(2) |
| <b>37</b> | C14 | C13 | C18 | 119.5(2) |
| <b>38</b> | C14 | C13 | N1  | 120.5(2) |
| <b>39</b> | C18 | C13 | N1  | 120.0(2) |
| <b>40</b> | C13 | C14 | H14 | 119.8    |
| <b>41</b> | C13 | C14 | C15 | 120.3(2) |
| <b>42</b> | H14 | C14 | C15 | 119.8    |
| <b>43</b> | C14 | C15 | H15 | 119.9    |
| <b>44</b> | C14 | C15 | C16 | 120.2(2) |
| <b>45</b> | H15 | C15 | C16 | 119.9    |
| <b>46</b> | C15 | C16 | C17 | 119.4(2) |
| <b>47</b> | C15 | C16 | C19 | 120.5(2) |
| <b>48</b> | C17 | C16 | C19 | 120.0(2) |
| <b>49</b> | C16 | C17 | H17 | 119.7    |
| <b>50</b> | C16 | C17 | C18 | 120.8(2) |
| <b>51</b> | H17 | C17 | C18 | 119.6    |
| <b>52</b> | C13 | C18 | C17 | 119.8(2) |

|           |     |     |     |          |
|-----------|-----|-----|-----|----------|
| <b>53</b> | C13 | C18 | H18 | 120.1    |
| <b>54</b> | C17 | C18 | H18 | 120.1    |
| <b>55</b> | C16 | C19 | N2  | 179.2(3) |
| <b>56</b> | C5  | N1  | C7  | 108.2(2) |
| <b>57</b> | C5  | N1  | C13 | 125.4(2) |
| <b>58</b> | C7  | N1  | C13 | 126.0(2) |
| <b>59</b> | H20 | C20 | C21 | 120.6    |
| <b>60</b> | H20 | C20 | C25 | 120.6    |
| <b>61</b> | C21 | C20 | C25 | 118.8(2) |
| <b>62</b> | C20 | C21 | H21 | 119.6    |
| <b>63</b> | C20 | C21 | C22 | 120.8(2) |
| <b>64</b> | H21 | C21 | C22 | 119.6    |
| <b>65</b> | C21 | C22 | H22 | 119.2    |
| <b>66</b> | C21 | C22 | C23 | 121.7(2) |
| <b>67</b> | H22 | C22 | C23 | 119.1    |
| <b>68</b> | C22 | C23 | H23 | 121.3    |
| <b>69</b> | C22 | C23 | C24 | 117.4(2) |
| <b>70</b> | H23 | C23 | C24 | 121.3    |
| <b>71</b> | C23 | C24 | C25 | 121.8(2) |
| <b>72</b> | C23 | C24 | N3  | 129.6(2) |
| <b>73</b> | C25 | C24 | N3  | 108.5(2) |
| <b>74</b> | C20 | C25 | C24 | 119.4(2) |
| <b>75</b> | C20 | C25 | C31 | 133.3(2) |
| <b>76</b> | C24 | C25 | C31 | 107.3(2) |
| <b>77</b> | C27 | C26 | C31 | 121.5(2) |
| <b>78</b> | C27 | C26 | N3  | 129.5(2) |
| <b>79</b> | C31 | C26 | N3  | 109.0(2) |
| <b>80</b> | C26 | C27 | H27 | 121.4    |
| <b>81</b> | C26 | C27 | C28 | 117.2(2) |
| <b>82</b> | H27 | C27 | C28 | 121.4    |
| <b>83</b> | C27 | C28 | H28 | 119.1    |
| <b>84</b> | C27 | C28 | C29 | 121.7(2) |
| <b>85</b> | H28 | C28 | C29 | 119.2    |
| <b>86</b> | C28 | C29 | H29 | 119.7    |
| <b>87</b> | C28 | C29 | C30 | 120.6(2) |
| <b>88</b> | H29 | C29 | C30 | 119.7    |
| <b>89</b> | C29 | C30 | H30 | 120.4    |
| <b>90</b> | C29 | C30 | C31 | 119.1(2) |
| <b>91</b> | H30 | C30 | C31 | 120.4    |
| <b>92</b> | C25 | C31 | C26 | 106.9(2) |
| <b>93</b> | C25 | C31 | C30 | 133.3(2) |
| <b>94</b> | C26 | C31 | C30 | 119.8(2) |
| <b>95</b> | C33 | C32 | C37 | 119.8(2) |
| <b>96</b> | C33 | C32 | N3  | 120.3(2) |

|            |     |     |     |          |
|------------|-----|-----|-----|----------|
| <b>97</b>  | C37 | C32 | N3  | 119.9(2) |
| <b>98</b>  | C32 | C33 | H33 | 120      |
| <b>99</b>  | C32 | C33 | C34 | 119.9(2) |
| <b>100</b> | H33 | C33 | C34 | 120.1    |
| <b>101</b> | C33 | C34 | H34 | 119.9    |
| <b>102</b> | C33 | C34 | C35 | 120.2(2) |
| <b>103</b> | H34 | C34 | C35 | 119.9    |
| <b>104</b> | C34 | C35 | C36 | 120.0(2) |
| <b>105</b> | C34 | C35 | C38 | 120.0(2) |
| <b>106</b> | C36 | C35 | C38 | 120.0(2) |
| <b>107</b> | C35 | C36 | H36 | 120.2    |
| <b>108</b> | C35 | C36 | C37 | 119.5(2) |
| <b>109</b> | H36 | C36 | C37 | 120.3    |
| <b>110</b> | C32 | C37 | C36 | 120.4(2) |
| <b>111</b> | C32 | C37 | H37 | 119.8    |
| <b>112</b> | C36 | C37 | H37 | 119.8    |
| <b>113</b> | C35 | C38 | N4  | 178.5(2) |
| <b>114</b> | C24 | N3  | C26 | 108.2(1) |
| <b>115</b> | C24 | N3  | C32 | 126.0(1) |
| <b>116</b> | C26 | N3  | C32 | 125.4(1) |

**Table S7b** The bond angles of MCN in X-ray crystal structure.

| <b>Number</b> | <b>Atom1</b> | <b>Atom2</b> | <b>Atom3</b> | <b>Angle</b> |
|---------------|--------------|--------------|--------------|--------------|
| <b>1</b>      | C1           | N1           | C12          | 107.4(3)     |
| <b>2</b>      | C1           | N1           | C13          | 124.9(3)     |
| <b>3</b>      | C12          | N1           | C13          | 127.6(3)     |
| <b>4</b>      | N1           | C1           | C2           | 127.7(4)     |
| <b>5</b>      | N1           | C1           | C6           | 109.8(4)     |
| <b>6</b>      | C2           | C1           | C6           | 122.3(4)     |
| <b>7</b>      | C1           | C2           | H2A          | 121.2        |
| <b>8</b>      | C1           | C2           | C3           | 117.8(4)     |
| <b>9</b>      | H2A          | C2           | C3           | 121          |
| <b>10</b>     | C2           | C3           | H3A          | 119.9        |
| <b>11</b>     | C2           | C3           | C4           | 120.2(5)     |
| <b>12</b>     | H3A          | C3           | C4           | 119.8        |
| <b>13</b>     | C3           | C4           | H4A          | 119.2        |
| <b>14</b>     | C3           | C4           | C5           | 121.5(5)     |
| <b>15</b>     | H4A          | C4           | C5           | 119.3        |
| <b>16</b>     | C4           | C5           | H5A          | 120.7        |
| <b>17</b>     | C4           | C5           | C6           | 118.7(5)     |
| <b>18</b>     | H5A          | C5           | C6           | 120.7        |
| <b>19</b>     | C1           | C6           | C5           | 119.4(4)     |
| <b>20</b>     | C1           | C6           | C7           | 107.0(4)     |

|    |      |     |      |          |
|----|------|-----|------|----------|
| 21 | C5   | C6  | C7   | 133.6(4) |
| 22 | C6   | C7  | C8   | 134.1(4) |
| 23 | C6   | C7  | C12  | 107.2(4) |
| 24 | C8   | C7  | C12  | 118.7(4) |
| 25 | C7   | C8  | H8A  | 120.1    |
| 26 | C7   | C8  | C9   | 119.7(5) |
| 27 | H8A  | C8  | C9   | 120.2    |
| 28 | C8   | C9  | H9A  | 119.5    |
| 29 | C8   | C9  | C10  | 120.9(5) |
| 30 | H9A  | C9  | C10  | 119.5    |
| 31 | C9   | C10 | H10A | 119.4    |
| 32 | C9   | C10 | C11  | 121.3(5) |
| 33 | H10A | C10 | C11  | 119.4    |
| 34 | C10  | C11 | H11A | 121.5    |
| 35 | C10  | C11 | C12  | 117.0(4) |
| 36 | H11A | C11 | C12  | 121.6    |
| 37 | N1   | C12 | C7   | 108.6(4) |
| 38 | N1   | C12 | C11  | 128.9(4) |
| 39 | C7   | C12 | C11  | 122.4(4) |
| 40 | N1   | C13 | C14  | 119.8(4) |
| 41 | N1   | C13 | C18  | 119.9(4) |
| 42 | C14  | C13 | C18  | 120.4(4) |
| 43 | C13  | C14 | H14A | 120.7    |
| 44 | C13  | C14 | C15  | 118.5(4) |
| 45 | H14A | C14 | C15  | 120.8    |
| 46 | C14  | C15 | H15A | 118.9    |
| 47 | C14  | C15 | C16  | 122.3(4) |
| 48 | H15A | C15 | C16  | 118.8    |
| 49 | C15  | C16 | H16A | 120.9    |
| 50 | C15  | C16 | C17  | 118.2(4) |
| 51 | H16A | C16 | C17  | 120.9    |
| 52 | C16  | C17 | C18  | 121.0(4) |
| 53 | C16  | C17 | C19  | 118.8(4) |
| 54 | C18  | C17 | C19  | 120.2(4) |
| 55 | C13  | C18 | C17  | 119.6(4) |
| 56 | C13  | C18 | H18A | 120.1    |
| 57 | C17  | C18 | H18A | 120.3    |
| 58 | N2   | C19 | C17  | 178.1(5) |

**Table S7c** The bond angles of OCN in X-ray crystal structure.

| <i>Number</i> | <i>Atom1</i> | <i>Atom2</i> | <i>Atom3</i> | <i>Angle</i> |
|---------------|--------------|--------------|--------------|--------------|
| 1             | H1A          | C1           | C2           | 119.1        |
| 2             | H1A          | C1           | C6           | 119.1        |

|           |      |     |      |          |
|-----------|------|-----|------|----------|
| <b>3</b>  | C2   | C1  | C6   | 121.9(3) |
| <b>4</b>  | C1   | C2  | H2A  | 119.2    |
| <b>5</b>  | C1   | C2  | C3   | 121.6(4) |
| <b>6</b>  | H2A  | C2  | C3   | 119.2    |
| <b>7</b>  | C2   | C3  | H3A  | 121.6    |
| <b>8</b>  | C2   | C3  | C4   | 116.8(3) |
| <b>9</b>  | H3A  | C3  | C4   | 121.6    |
| <b>10</b> | C3   | C4  | C5   | 122.4(3) |
| <b>11</b> | C3   | C4  | N1   | 129.1(2) |
| <b>12</b> | C5   | C4  | N1   | 108.4(2) |
| <b>13</b> | C4   | C5  | C6   | 119.1(3) |
| <b>14</b> | C4   | C5  | C12  | 107.3(2) |
| <b>15</b> | C6   | C5  | C12  | 133.6(3) |
| <b>16</b> | C1   | C6  | C5   | 118.3(3) |
| <b>17</b> | C1   | C6  | H6A  | 120.8    |
| <b>18</b> | C5   | C6  | H6A  | 120.9    |
| <b>19</b> | C8   | C7  | C12  | 122.2(2) |
| <b>20</b> | C8   | C7  | N1   | 129.0(2) |
| <b>21</b> | C12  | C7  | N1   | 108.7(2) |
| <b>22</b> | C7   | C8  | H8A  | 121.3    |
| <b>23</b> | C7   | C8  | C9   | 117.4(2) |
| <b>24</b> | H8A  | C8  | C9   | 121.3    |
| <b>25</b> | C8   | C9  | H9A  | 119.2    |
| <b>26</b> | C8   | C9  | C10  | 121.7(2) |
| <b>27</b> | H9A  | C9  | C10  | 119.2    |
| <b>28</b> | C9   | C10 | H10A | 119.7    |
| <b>29</b> | C9   | C10 | C11  | 120.6(3) |
| <b>30</b> | H10A | C10 | C11  | 119.7    |
| <b>31</b> | C10  | C11 | H11A | 120.3    |
| <b>32</b> | C10  | C11 | C12  | 119.4(3) |
| <b>33</b> | H11A | C11 | C12  | 120.3    |
| <b>34</b> | C5   | C12 | C7   | 106.9(2) |
| <b>35</b> | C5   | C12 | C11  | 134.3(2) |
| <b>36</b> | C7   | C12 | C11  | 118.7(2) |
| <b>37</b> | C14  | C13 | C18  | 119.3(2) |
| <b>38</b> | C14  | C13 | N1   | 120.7(2) |
| <b>39</b> | C18  | C13 | N1   | 120.0(2) |
| <b>40</b> | C13  | C14 | H14A | 120      |
| <b>41</b> | C13  | C14 | C15  | 119.9(2) |
| <b>42</b> | H14A | C14 | C15  | 120.1    |
| <b>43</b> | C14  | C15 | H15A | 119.6    |
| <b>44</b> | C14  | C15 | C16  | 120.8(3) |
| <b>45</b> | H15A | C15 | C16  | 119.6    |
| <b>46</b> | C15  | C16 | H16A | 120      |

|    |      |     |      |          |
|----|------|-----|------|----------|
| 47 | C15  | C16 | C17  | 120.0(3) |
| 48 | H16A | C16 | C17  | 120      |
| 49 | C16  | C17 | H17A | 119.9    |
| 50 | C16  | C17 | C18  | 120.1(3) |
| 51 | H17A | C17 | C18  | 119.9    |
| 52 | C13  | C18 | C17  | 119.8(2) |
| 53 | C13  | C18 | C19  | 120.2(2) |
| 54 | C17  | C18 | C19  | 120.0(2) |
| 55 | C18  | C19 | N2   | 178.3(3) |
| 56 | C4   | N1  | C7   | 108.6(2) |
| 57 | C4   | N1  | C13  | 125.4(2) |
| 58 | C7   | N1  | C13  | 125.2(2) |

**Table S7d** The bond angles of 2CN in X-ray crystal structure.

| <i>Number</i> | <i>Atom1</i> | <i>Atom2</i> | <i>Atom3</i> | <i>Angle</i> |
|---------------|--------------|--------------|--------------|--------------|
| 1             | C1           | N1           | C12          | 108.5(1)     |
| 2             | C1           | N1           | C14          | 124.4(1)     |
| 3             | C12          | N1           | C14          | 126.2(1)     |
| 4             | N1           | C1           | C2           | 129.6(2)     |
| 5             | N1           | C1           | C6           | 109.1(1)     |
| 6             | C2           | C1           | C6           | 121.3(2)     |
| 7             | C1           | C2           | H2A          | 120.8        |
| 8             | C1           | C2           | C3           | 118.3(2)     |
| 9             | H2A          | C2           | C3           | 120.8        |
| 10            | C2           | C3           | H3A          | 119.4        |
| 11            | C2           | C3           | C4           | 121.2(2)     |
| 12            | H3A          | C3           | C4           | 119.4        |
| 13            | C3           | C4           | H4A          | 119.7        |
| 14            | C3           | C4           | C5           | 120.6(2)     |
| 15            | H4A          | C4           | C5           | 119.7        |
| 16            | C4           | C5           | H5A          | 120.1        |
| 17            | C4           | C5           | C6           | 119.8(2)     |
| 18            | H5A          | C5           | C6           | 120.1        |
| 19            | C1           | C6           | C5           | 118.8(2)     |
| 20            | C1           | C6           | C7           | 106.7(1)     |
| 21            | C5           | C6           | C7           | 134.5(2)     |
| 22            | C6           | C7           | C8           | 134.1(2)     |
| 23            | C6           | C7           | C12          | 107.0(1)     |
| 24            | C8           | C7           | C12          | 118.9(2)     |
| 25            | C7           | C8           | H8A          | 120.1        |
| 26            | C7           | C8           | C9           | 119.9(2)     |
| 27            | H8A          | C8           | C9           | 120          |
| 28            | C8           | C9           | H9A          | 119.7        |

|    |      |     |      |          |
|----|------|-----|------|----------|
| 29 | C8   | C9  | C10  | 120.6(2) |
| 30 | H9A  | C9  | C10  | 119.7    |
| 31 | C9   | C10 | C11  | 120.9(2) |
| 32 | C9   | C10 | C13  | 119.6(2) |
| 33 | C11  | C10 | C13  | 119.5(2) |
| 34 | C10  | C11 | H11A | 121.1    |
| 35 | C10  | C11 | C12  | 117.9(2) |
| 36 | H11A | C11 | C12  | 121.1    |
| 37 | N1   | C12 | C7   | 108.7(1) |
| 38 | N1   | C12 | C11  | 129.4(2) |
| 39 | C7   | C12 | C11  | 121.8(2) |
| 40 | N2   | C13 | C10  | 178.1(2) |
| 41 | N1   | C14 | C15  | 119.8(2) |
| 42 | N1   | C14 | C19  | 119.7(2) |
| 43 | C15  | C14 | C19  | 120.5(2) |
| 44 | C14  | C15 | H15A | 120.2    |
| 45 | C14  | C15 | C16  | 119.6(2) |
| 46 | H15A | C15 | C16  | 120.2    |
| 47 | C15  | C16 | H16A | 119.9    |
| 48 | C15  | C16 | C17  | 120.1(2) |
| 49 | H16A | C16 | C17  | 119.9    |
| 50 | C16  | C17 | H17A | 119.8    |
| 51 | C16  | C17 | C18  | 120.6(2) |
| 52 | H17A | C17 | C18  | 119.6    |
| 53 | C17  | C18 | H18A | 120      |
| 54 | C17  | C18 | C19  | 120.0(2) |
| 55 | H18A | C18 | C19  | 120      |
| 56 | C14  | C19 | C18  | 119.2(2) |
| 57 | C14  | C19 | H19A | 120.4    |
| 58 | C18  | C19 | H19A | 120.5    |

**Table S7e** The bond angles of 3CN in X-ray crystal structure.

| <i>Number</i> | <i>Atom1</i> | <i>Atom2</i> | <i>Atom3</i> | <i>Angle</i> |
|---------------|--------------|--------------|--------------|--------------|
| 1             | C10          | C9           | C14          | 120.0(1)     |
| 2             | C10          | C9           | N1           | 120.3(2)     |
| 3             | C14          | C9           | N1           | 119.7(2)     |
| 4             | C9           | C10          | H10A         | 120          |
| 5             | C9           | C10          | C11          | 120.0(2)     |
| 6             | H10A         | C10          | C11          | 120          |
| 7             | C10          | C11          | H11A         | 120          |
| 8             | C10          | C11          | C12          | 120.0(2)     |
| 9             | H11A         | C11          | C12          | 120          |
| 10            | C11          | C12          | H12A         | 120          |
| 11            | C11          | C12          | C13          | 120.0(2)     |



|    |      |     |      |          |
|----|------|-----|------|----------|
| 12 | H12A | C12 | C13  | 120      |
| 13 | C12  | C13 | H13A | 120      |
| 14 | C12  | C13 | C14  | 120.0(2) |
| 15 | H13A | C13 | C14  | 120      |
| 16 | C9   | C14 | C13  | 120.0(2) |
| 17 | C9   | C14 | H14A | 120      |
| 18 | C13  | C14 | H14A | 120      |
| 19 | C9   | N1  | C1   | 125.5(2) |
| 20 | C9   | N1  | C8   | 125.6(2) |
| 21 | C1   | N1  | C8   | 108.8(2) |
| 22 | N1   | C1  | C2   | 128.9(2) |
| 23 | N1   | C1  | C6   | 108.9(2) |
| 24 | C2   | C1  | C6   | 122.2(2) |
| 25 | C1   | C2  | H2A  | 121.6    |
| 26 | C1   | C2  | C3   | 117.0(3) |
| 27 | H2A  | C2  | C3   | 121.5    |
| 28 | C2   | C3  | H3A  | 119      |
| 29 | C2   | C3  | C4   | 121.8(3) |
| 30 | H3A  | C3  | C4   | 119.1    |
| 31 | C3   | C4  | H4A  | 119.4    |
| 32 | C3   | C4  | C5   | 121.0(3) |
| 33 | H4A  | C4  | C5   | 119.5    |
| 34 | C4   | C5  | H5A  | 120.7    |
| 35 | C4   | C5  | C6   | 118.6(3) |
| 36 | H5A  | C5  | C6   | 120.6    |
| 37 | C1   | C6  | C5   | 119.3(2) |
| 38 | C1   | C6  | C7   | 106.7(2) |
| 39 | C5   | C6  | C7   | 134.0(2) |
| 40 | C6   | C7  | C8   | 107.0(2) |
| 41 | C6   | C7  | C18  | 134.0(2) |
| 42 | C8   | C7  | C18  | 118.9(2) |
| 43 | N1   | C8  | C7   | 108.5(2) |
| 44 | N1   | C8  | C15  | 129.5(2) |
| 45 | C7   | C8  | C15  | 122.0(2) |
| 46 | C8   | C15 | H15A | 121      |
| 47 | C8   | C15 | C16  | 118.1(2) |
| 48 | H15A | C15 | C16  | 120.9    |
| 49 | C15  | C16 | H16A | 119.6    |
| 50 | C15  | C16 | C17  | 120.9(2) |
| 51 | H16A | C16 | C17  | 119.5    |
| 52 | C16  | C17 | C18  | 121.0(2) |
| 53 | C16  | C17 | C19  | 119.7(2) |
| 54 | C18  | C17 | C19  | 119.3(2) |
| 55 | C7   | C18 | C17  | 119.1(2) |

|           |     |     |      |          |
|-----------|-----|-----|------|----------|
| <b>56</b> | C7  | C18 | H18A | 120.5    |
| <b>57</b> | C17 | C18 | H18A | 120.5    |
| <b>58</b> | N2  | C19 | C17  | 178.8(3) |

---
